# Supplementary material for: Time-to-event modeling of hypertension reveals the nonexistence of true controls
Source: eLife. 2020 Dec 1;9:e62998. doi: 10.7554/eLife.62998 (PMC7707825; doi:10.7554/eLife.62998)
Supplement: Supplementary file 1. [file elife-62998-supp1.xlsx]

## Sheet: HUFS
Supplementary File 1: Source data for the Howard University Family Study
age (yrs)	weight (lbs)	chloride (mmol/L)	potassium (mmol/L)	low-density lipoprotein cholesterol (mg/dL)	uric acid (mg/dL)	insulin (mIU/L)	hypertension
14	223.6	101	4.4	110	3.6	19.97	0
14	141.8	103	4.3	85	5.8	2.33	0
14	209.8	102.9	4.29	93	4.8	20.12	0
15	135.5	102.1	4.34	94	3.8	13.45	0
15	150.4	102	4.2	101	3.3	9.61	0
15	237.2	99.2	4.26	93	4.6	28.21	0
16	192	99.9	4.37	70	7.4	10.98	0
16	161	97	4.2	100	5.9	4.74	0
17	141.21	102	4	100	4.2	5.03	0
17	211	100	4.2	80	4.2	7.49	0
18	152.2	97.9	4.35	124	3.3	26.14	0
18	148	103.5	4.85	127	5.5	6.88	0
18	142.8	112.2	4.53	85	5.1	19.71	0
18	124	99.1	4.51	81	3.9	1.64	0
18	149	103.6	4.82	49	4.2	17.4	0
18	139	103	4.18	75	5.2	2.33	0
18	176	103	4.48	94	4.2	10.47	0
18	110	101.8	4.43	106	2.8	21.83	0
18	120.6	101.7	4.38	64	3.3	6.06	0
18	193.8	100.6	3.87	100	6.6	9.19	0
18	164.6	103	4.37	96	6.4	3.2	0
18	158.8	101.3	4	130	2.8	9.7	0
19	185.9	100.1	4.29	128	6.1	6.13	0
19	202.4	101.9	4.26	63	4.8	4.55	0
19	170.2	99.9	4.71	81	6	10.79	0
19	198	103.5	4.77	93	4.7	7.01	0
19	134.4	101.2	4.17	77	4.8	8.17	0
19	157.6	103.7	5.27	104	5.4	8.55	0
19	145.4	101.4	4.46	114	3.2	29.32	0
19	113.6	102.8	3.79	64	4.1	22.6	0
19	142.4	101.9	4.92	61	6.8	2.71	0
19	270	104.3	4.14	143	6.1	9.03	0
20	135.6	97.5	5.2	105	3.8	4.64	1
20	171.6	100.9	4.35	61	7.6	3.15	1
20	182.4	99	4.2	158	5.6	10.09	0
20	121.6	98	4.4	124	2.5	16.93	0
20	111.6	108	4.82	108	3.9	8.47	0
20	218.2	84.9	4.21	49	5.7	5.69	0
20	168.2	100.5	3.69	91	4.3	2.5	0
20	146.2	104.5	3.99	98	2.6	8.26	0
20	123.6	104.5	4.29	102	4.3	5.45	0
20	157	98.7	3.8	112	4.3	13.69	0
20	214.2	101.9	4.19	114	4.5	17.71	0
21	181.7	103	4.7	152	5.3	7.33	0
21	163	100	4.4	104	2.5	16.75	0
21	138.5	102.5	4.52	113	5.6	1.75	0
21	98.6	108.2	4.8	65	3.5	13.73	0
21	215.8	99.4	4.05	157	6.3	21.09	0
21	137.6	100	3.69	86	4.4	4.99	0
21	134.2	100.4	4.54	110	4.8	4.63	0
21	246.8	99.3	4.39	222	2.6	15.85	0
21	184.4	98.1	4.66	90	4.8	10.77	0
21	200.2	101.7	4.03	91	2.9	4.77	0
21	160.6	106.1	4.61	104	4.2	15.13	0
21	143.6	101.7	4.18	84	4.7	7.59	0
22	146.4	103	4.1	99	5.5	1.84	0
22	211	100.2	4.45	121	5.3	6.82	0
22	214.8	102.6	4.61	137	5.5	8.21	0
22	250.6	104	4.32	88	4.9	27.51	0
22	249.6	111.4	5.54	78	6.7	16.04	0
22	151.8	98	4.41	77	3.7	4.53	0
22	208.8	99.4	4.69	168	6.9	30.58	0
22	184.4	101.8	4.09	131	5.7	4.05	0
22	147	101.9	4.2	94	3.6	13.7	0
22	165.2	101.9	4.22	85	5	12.08	0
22	209.4	96.7	5.48	191	7.8	8.17	0
22	162	100.9	4.51	103	5.9	9.17	0
23	198	96.7	4.25	148	7.6	10.18	1
23	280.4	101.4	4.62	109	6.5	15.73	1
23	234.4	105.3	3.78	120	5.3	34.29	0
23	157.8	102.3	5.77	167	7.2	5.01	0
23	162.6	102.2	4.86	98	6.7	2.59	0
23	205.4	103.3	4.22	88	4.5	12.27	0
23	163	97.9	4.32	175	5.6	7.26	0
23	168.2	99.9	4.49	170	4.6	9.51	0
24	178.8	100.8	4.42	82	6	3.68	0
24	202.2	100.4	3.95	85	3.2	14.65	0
24	165.4	103.8	4.18	118	5.5	10.55	0
24	228.2	103.2	3.89	130	4.9	9.73	0
24	269.6	102	4.6	122	5.7	14.57	0
24	138.8	99.2	4.31	47	2.7	1.93	0
25	172.3	101	4.4	137	4.6	8.59	0
25	203	103.7	4.61	130	6.8	38.1	0
25	226	103.1	5.01	93	4.4	21.91	0
25	133	100.8	4.75	48	5.2	10.34	0
25	128.6	125.3	5.09	61	7.9	2.94	0
25	156	101.1	4.03	157	2.4	6.2	0
26	311.2	125	5	149	4	9.63	0
26	151.8	84.9	3.37	132	2.6	5.93	0
26	176.3	96.4	4.93	110	5.6	5.62	0
26	192.4	99.3	4.15	99	2.8	12.9	0
26	138.8	100.1	3.91	96	6.3	3.27	0
26	118.6	101.3	3.69	93	3.3	7.14	0
26	199.4	96.4	3.99	69	4.5	34.61	0
26	134.4	102.3	4.49	100	4.2	30.63	0
26	157	101.4	4.85	118	4.9	8.3	0
26	96.6	100.1	4.41	95	5	4.91	0
27	188.6	104.2	4.29	82	5.3	60.85	1
27	139.2	110	4.9	112	4.2	10.6	0
27	105.2	103.9	4.41	105	4.7	6.77	0
27	245.3	103	4.3	101	7	13.78	0
27	205.4	104.6	3.8	73	3.3	14.16	0
27	149.8	104.3	3.84	130	3.7	5.17	0
27	207	101.8	4.15	112	5.9	1.86	0
27	198.6	99	4.7	152	7.1	13.11	0
27	183.2	94.3	4.32	89	5.1	2.37	0
28	197	96.8	4.91	96	5.4	18.49	1
28	159	105.2	5.33	152	10.1	2.81	1
28	172.2	99.1	4.17	91	4.1	11.71	0
28	212	99.3	5.17	133	3.7	8.1	0
28	248	99.9	4.35	132	6	13.06	0
29	173.4	101	4	165	3.5	9.38	0
29	203	103.7	4.72	112	4	3.14	0
29	203.68	100	4	75	5	4.35	0
29	196.8	100.6	3.74	102	3.9	9.12	0
29	222	102.7	4.68	114	5.2	39.92	0
29	150.8	100.5	4.48	94	3.5	10.37	0
29	193.4	100.7	12.06	148	4.8	6.52	0
29	170.8	102.3	3.76	96	3.6	9.53	0
30	183.6	103.7	3.93	137	4.7	12.58	1
30	149.3	99.7	3.74	80	3.1	18.33	1
30	245.3	103.6	4	164	5.4	30.22	0
30	156.8	107.7	4.18	90	3.7	35.14	0
30	169.8	99.4	5.08	81	6.5	2.66	0
30	186.4	103	4.36	89	6.6	16.75	0
30	163	106.8	4	90	3.7	6.98	0
30	220.4	101	4.67	86	5.2	7.45	0
30	213	104	4.45	119	5.2	4.32	0
30	148.6	101.1	4.25	75	6.2	1.62	0
30	321.2	102.8	4.17	129	6.1	14.56	0
30	188.8	102.3	4.81	149	4.5	8.35	0
31	159	125	5.38	77	9.7	3.07	1
31	200.6	101	4.11	65	5.8	10.68	0
31	226	100	6.8	122	4.6	14.62	0
31	198	100	5.1	89	5.4	5.25	0
31	169.8	104.9	4.14	87	4.3	6.66	0
31	298.2	99.7	4.28	152	6	31.99	0
31	108.6	103.7	4.42	110	4.9	4.1	0
31	235.4	104.8	5.34	159	5.2	13.05	0
32	146	99.7	4.41	68	4.4	11.03	1
32	271.2	104.9	4.91	104	5.6	72.83	1
32	139.6	97.6	4.16	104	4.8	1.78	0
32	171	101	4.11	94	4.2	23.71	0
32	199.4	102.1	4.09	120	6.9	12.38	0
32	237.4	101.4	4.42	43	5.2	20.46	0
32	143.6	104.3	4.4	89	2.8	10.73	0
32	150.6	118.7	5.84	159	7.8	3.11	0
32	150.2	97.4	4.22	116	4.3	10.46	0
32	188.8	101.4	4.13	42	3.5	2.4	0
32	138.4	100.7	4.17	106	2.5	7.24	0
32	169.6	100.9	4.17	150	7	14.21	0
33	395.2	103.9	3.91	127	6.1	13.96	1
33	129.1	102	3.7	84	3.2	2.04	0
33	88.5	101	4.4	109	3.3	4.37	0
33	201	103.4	4.73	138	4.1	13.51	0
33	137	94.6	3.42	158	4.6	2.62	0
34	227.26	102	3.9	153	4.4	7.12	1
34	186.3	102	5.4	118	4.5	5.74	0
34	234.8	103.8	3.92	129	4.1	9.45	0
34	187	99.3	4.82	62	4	9.47	0
34	180.4	102.5	4.95	149	2.9	7.41	0
34	319	99	4.57	117	4.9	37.98	0
35	194.6	101	4.4	103	4.3	9.06	1
35	214.6	98.9	4.06	133	4.3	4.47	1
35	186.8	100.3	3.93	111	1.6	7.53	1
35	323.3	101.3	4.36	105	7.2	17.82	1
35	174.8	100.9	4.67	123	7	2.66	1
35	237.6	102.6	4.5	82	4.4	14.87	1
35	276.6	103.5	4.34	123	5.5	5.29	0
35	144.8	103.6	3.84	64	3	2.12	0
35	170.2	99.6	3.56	121	3	4.34	0
35	172	103.5	3.75	103	3.6	5.64	0
35	242.4	102.7	4.16	173	5.5	9.89	0
35	195.8	101.6	13.17	140	3.6	7.48	0
35	169.6	101.3	5.18	63	7.3	6.77	0
36	221.5	101	4.1	129	4.8	12.47	1
36	189	102	4.8	206	5.6	4.36	1
36	153	100.2	3.76	109	2.9	7.56	1
36	496.8	99.3	3.98	65	5.8	33.12	1
36	154	98	4.7	79	6.3	0.91	0
36	287	103	3.9	119	4	32.03	0
36	221.4	101.8	4.25	73	3.3	11.57	0
36	201.6	104.6	4.33	103	5.3	14.3	0
36	201.2	104	4.3	77	3.5	11.79	0
36	192.6	102.4	7.96	135	6.3	36.01	0
36	105.8	99.6	4.27	100	4.7	5.71	0
36	175.8	100	3.95	126	3.2	9.93	0
36	132.2	104.2	4.5	120	4.4	5.15	0
36	198.8	104.6	4.26	86	4.7	30.84	0
36	201.6	105.6	4.37	127	3.7	10.76	0
36	222.4	97.9	4.46	121	6.4	13.36	0
37	214.2	107.4	4.17	86	3.3	3.9	1
37	177.4	99.8	4.39	16	7.8	7.75	1
37	208.2	99	4.43	103	7.5	12	1
37	115.52	102	4.5	50	4.5	1.15	0
37	109.01	101	4.4	61	5.1	14.32	0
37	211.6	100	4.3	123	6	12.53	0
37	179.6	101	4.1	74	4.5	8.43	0
37	259.4	103.1	4.67	118	4.6	12.28	0
37	115.9	98	4.4	58	4.6	3.21	0
37	162.8	106	4.4	136	8.4	8.84	0
37	249	97.9	4.64	111	4.6	11.76	0
37	166.2	101.4	3.82	107	4.1	6.72	0
37	199.8	101.3	3.86	149	5.5	6.44	0
37	301	102.1	5.12	47	6.2	3.59	0
37	131.4	103.5	3.73	97	4	2.8	0
37	126.8	100.7	4.91	106	3.5	1.95	0
37	158.4	96.9	4.26	64	5	3.34	0
37	167.6	102.2	4.61	136	5.3	1.43	0
37	123.2	99.5	4.25	90	3.4	4.51	0
38	385.7	99	4.4	114	7.1	23.31	1
38	154.8	103	3.7	149	3.8	0.382	1
38	267	100	3.9	144	7.9	24.63	1
38	140.8	97.3	4.11	91	5.9	2.43	1
38	176.4	103	4.8	67	7.8	26.88	1
38	166.2	104.9	7.31	94	3.8	3.57	1
38	233.6	108.7	4.05	197	6.4	33.96	1
38	231.6	104.5	3.73	136	7	18.27	1
38	175.4	103.7	4.48	199	5.3	1.92	1
38	167	96.1	4.6	112	6.7	0.239	1
38	180.3	101	4.4	87	6.4	26.35	0
38	183	101	4.5	123	4.8	12.86	0
38	127.4	102.2	4.11	98	1.8	10.79	0
38	262.5	97	4.3	128	7.2	21.7	0
38	201.2	100	4.8	105	4.6	4.91	0
38	206.8	104.2	4.71	114	5.7	6.9	0
38	170	105.7	4.54	101	4.8	8.04	0
38	224.6	104.2	3.97	36	4.3	7.81	0
38	243.2	100.1	4.48	80	5.4	18.39	0
38	236.2	103.3	6.93	111	5.5	6.04	0
38	142.8	97.8	4.79	129	8.4	0.447	0
38	159	107.6	4.13	58	5.4	2.65	0
38	156.8	100.1	3.63	69	3	14.86	0
38	245.6	105.2	4.32	124	6.6	19.34	0
38	195.8	101.6	4.22	137	5.6	3.09	0
38	358.8	103.6	4.13	193	6	53.65	0
38	202.4	99.3	4.37	96	5.9	1.31	0
39	370	96	4.8	120	7.1	22.95	1
39	279.4	96	3.8	59	6.4	6.77	1
39	200	100.3	4.44	60	5.8	9.58	1
39	161.6	101.5	4.45	95	8.8	11.58	1
39	152.2	104	4.4	169	3.7	5.39	0
39	177.4	101	4.3	85	4.9	18.9	0
39	224.4	110	4.5	124	4.7	13.41	0
39	123	102.5	4.37	85	5.1	2.81	0
39	192	101.9	4.74	168	8.7	5.67	0
39	144.2	104.5	4.21	54	3.9	0.953	0
39	195.8	96.7	3.83	81	5.1	5.48	0
39	220	102.3	4.27	150	5.9	2.26	0
39	268.2	99.7	4.08	88	6.9	11.07	0
39	181.4	100.6	3.66	98	3.2	18.44	0
39	211.8	101	4.54	111	5.1	7.71	0
40	132.2	102.9	3.83	85	4.5	3.38	1
40	312.5	105.4	4.04	128	7.8	6.82	1
40	273.4	99.8	4.22	206	7	23.13	1
40	182.6	101	3.94	117	4.7	3.89	1
40	206.8	104.9	4.86	123	2.7	5.89	1
40	184.4	102	5.54	166	5.9	2.06	1
40	170.2	103	4.1	108	3	6.42	0
40	103	98	4.52	96	5	4.3	0
40	193	101.6	4.51	144	3.3	5.24	0
40	271.8	101	4.2	116	4.1	5.8	0
40	178.2	100.4	4	122	2.8	2.21	0
40	139	103.4	4.52	84	5.3	0.515	0
40	187.4	105.1	4.13	99	8.3	36.78	0
40	199	98.4	4.33	104	6.6	4.05	0
40	160.6	102.7	4.61	111	3	5.33	0
40	194.4	103.6	4.43	131	6.4	3.98	0
40	118.2	101.1	4.29	92	2.7	5.06	0
40	150.8	106.3	4.46	129	3.9	3.2	0
40	179.6	100.7	4.61	112	6.9	3.93	0
40	155	103.7	3.98	121	6.3	18.16	0
41	185.52	102	4.6	135	6.9	8.97	1
41	325.42	101	4.6	177	6.1	22.76	1
41	329	99	4	47	6.5	18.14	1
41	154.2	100.4	4.13	104	6.5	4.37	1
41	362	101.3	4.25	136	7.4	13.35	1
41	170.6	99.9	3.95	61	3.4	13.23	1
41	229.4	98.2	5.15	21	0.3	2.21	1
41	218	103.4	4.44	122	4.3	7.54	1
41	332.4	102	3.69	125	4.4	21.57	1
41	247.7	104	4.4	107	5.2	13.84	0
41	185.8	105	4.4	58	8.7	3.65	0
41	245.6	85.7	3.41	62	3.9	19.93	0
41	149.2	96.6	3.97	77	4.4	5.09	0
41	166.8	92.7	4.78	77	2.2	1.97	0
41	194	98	3.97	100	6	12.96	0
41	198	102.8	4.16	154	9.3	9.77	0
41	167.4	102.3	4.39	78	5.8	8.36	0
41	302.4	103.6	5.07	181	5.7	18.93	0
41	403.6	103	4.54	161	2.5	9.7	0
41	119	129.7	5.24	87	4	6.29	0
41	158.2	103.4	3.97	76	7	3.05	0
41	200.2	98.6	4.66	54	5.5	21.41	0
41	173.5	104	5.61	84	7.8	3.48	0
41	91.6	98.5	4.23	100	3	1.45	0
41	195.8	102.9	4.68	179	6.1	14.85	0
41	208.8	99.3	3.74	106	6.3	11.99	0
42	283.38	90	4.4	78	9.1	26.27	1
42	189.46	104	3.7	173	9.8	13.39	1
42	185.6	103.9	4.77	84	4	5.92	1
42	214.8	102.6	4.33	167	5.3	11.54	1
42	160.3	93.5	4.58	59	3	3.92	1
42	181.6	101.9	4.76	134	6.3	21.11	1
42	222.4	96.7	4.32	116	5.7	22.55	1
42	216.6	101.8	3.43	43	7.6	33.34	1
42	167.2	111	4.58	90	3.6	7.74	1
42	179.2	101.4	4.16	85	4	36.33	1
42	214	105.4	4.81	140	5.6	6.99	1
42	171	104.4	5.25	90	7.5	0.767	1
42	179.2	103.6	4.67	145	2.8	9.09	1
42	190.3	100.8	4.41	171	4.5	10.72	1
42	512.6	99.1	4.12	131	9.8	18.61	1
42	259.6	94	4.1	122	3.4	10.99	0
42	198.4	99	5.4	204	8.5	13.41	0
42	241	100	4.7	120	6.7	4.9	0
42	232.8	107	4.7	150	5.6	5.4	0
42	208.4	95.7	3.99	113	3.6	4.99	0
42	193.8	101.5	4.12	168	5	8.59	0
42	145.6	101.6	4.72	136	2.8	16.4	0
42	191.2	101.1	4.35	141	3.9	12.76	0
42	165.4	98.1	3.88	91	7	7.53	0
42	207.5	107.5	5.29	96	5.5	4.62	0
42	187.6	98.9	4.07	106	5.7	7.96	0
42	155.8	123.7	5.17	86	4.5	11.15	0
42	401	97.9	4.79	175	7.2	35.33	0
42	133.8	100.8	3.72	134	6.2	6.11	0
42	123.2	103.4	4.17	113	5.3	0.652	0
42	140.8	103.9	4.79	40	5.5	1.42	0
42	185.2	100.6	3.7	93	6.1	10.59	0
42	161.4	103.2	4.29	99	5.1	4.94	0
43	389.6	96	5.1	127	3.5	21	1
43	135.2	101	5	122	6.1	2.86	1
43	190	98	4	95	4.4	28.81	1
43	221.8	103	4.4	74	6.3	17.23	1
43	153.2	90.7	3.08	145	6.4	24.28	1
43	252.4	99.8	3.82	137	6.6	189	1
43	269.6	105.5	5.17	126	5.8	24	1
43	193.6	101.2	3.51	119	2.9	4.34	1
43	107	103.6	3.77	92	3.9	0.749	1
43	142	99.2	4.25	109	7.7	1.3	1
43	158	100.3	4.22	94	3.6	29.09	1
43	153.6	100.2	3.7	49	6.7	4.34	1
43	153	100.1	4.06	82	6.8	6.78	1
43	350	102.2	5.26	96	6.8	8.31	1
43	162.1	96	4.2	54	5.1	3.23	0
43	129.67	100	4.3	138	3	5.73	0
43	374.3	103	5.1	156	4.2	10.41	0
43	171.8	101	4.1	119	4.4	18.83	0
43	156.1	103	3.9	64	3.4	5.3	0
43	160.8	91.3	4.93	109	4.1	12.25	0
43	215.5	101	5.6	117	6.2	12.35	0
43	150.8	103.1	4.36	92	6.4	3.16	0
43	150.5	101.8	4.28	115	4.5	10.86	0
43	166.4	93.8	4.56	142	3.8	2.4	0
43	145	103.8	4.17	77	4.3	4.56	0
43	249.8	106.3	4.24	112	6.1	7.82	0
43	195.2	99.6	4.99	85	4.6	3.1	0
43	151.2	104.2	4.41	145	3.6	7.85	0
43	132.8	103.1	3.44	80	4.6	17.64	0
43	153.2	101.6	5.13	89	4.6	3.93	0
43	214.4	102.3	4.49	166	3.8	4.16	0
43	173.6	103.5	4.42	52	7.1	7.22	0
43	138.4	101.7	4.05	91	4.4	1	0
44	234.4	99	4.1	73	5.5	7.53	1
44	169.22	97	4	115	3.2	6.02	1
44	147.4	99	4.2	49	5.3	13.59	1
44	361.6	100.4	4	168	4.5	7.29	1
44	191.2	107.6	4.04	105	6.4	6.15	1
44	211.2	100.1	3.65	128	6.6	17.95	1
44	215	108.6	3.76	111	4.5	13.74	1
44	210.6	105.2	4.18	73	5.2	12.44	1
44	365.4	100.4	4.29	92	6.3	21.01	1
44	238.6	97.4	4.28	153	4.5	30.93	1
44	176.6	103.3	3.93	171	3.3	2.03	1
44	242.2	99	4.96	173	5.9	19.5	1
44	176.2	98.5	3.7	89	6.6	11.08	1
44	221.8	101	3.5	88	5.4	9.45	0
44	141.64	100	4.4	64	5.9	1.8	0
44	134.2	100	4.3	54	8.7	4.87	0
44	200	100	4.2	165	5.9	14.75	0
44	155	101.5	4.56	127	4.7	6.74	0
44	219.2	111.7	5.35	170	6	35.38	0
44	205.6	95.6	3.58	101	7.5	30.86	0
44	118	101.3	4.21	98	6.1	2.59	0
44	145.2	100.2	3.93	124	4	2.94	0
44	260	108.7	4.47	77	5.8	9.7	0
44	167	105.4	4.1	63	6.9	2.23	0
44	202.8	103.3	4.7	105	7.4	3.47	0
44	135	95.8	4.66	54	4.5	1.54	0
44	144.8	105.5	3.87	114	4.9	2.31	0
44	235	100.5	4.3	175	5.9	10.19	0
44	200.6	101.9	4.73	191	5.8	5.93	0
44	125.8	93.8	4.91	132	7	2.14	0
44	150	101.4	4.14	126	4.3	1.93	0
44	154.8	92.1	4.12	117	5.8	7.56	0
45	147.6	100	3.8	143	5.1	6.27	1
45	269.6	100	4	78	6.5	24.5	1
45	190.89	107	3.8	123	6.4	7.91	1
45	218	108	4.6	101	7.2	11.95	1
45	263.4	104.1	4.48	124	5	12.27	1
45	189	99.2	4.44	163	4.1	5.76	1
45	160.8	97	3.9	94	5.5	3.65	1
45	198.6	100.4	4.96	112	5.7	34.12	1
45	265.6	104.2	4.34	133	7.4	9.19	1
45	207.4	98.2	3.61	161	8.1	7.92	1
45	240.2	102.8	4.26	136	8.7	13.01	1
45	164	101.3	4.64	158	6.6	2.05	1
45	158.8	95.7	3.73	97	5	7.13	1
45	192.2	102.2	4.96	123	8.3	1.95	1
45	136.4	104.7	4.42	150	5	5.73	1
45	212.2	100	3.6	82	6.3	4.94	1
45	205.2	102	4.7	128	4.9	8.22	0
45	253	99	4.7	111	4.6	7.26	0
45	241.8	104	4.7	94	5.3	9	0
45	164.4	99.3	3.91	111	4.4	4.91	0
45	142	98	4.51	175	6.5	4.83	0
45	151.8	98.4	4.09	176	3.1	3.8	0
45	151.8	102.9	4.04	140	2.8	4.19	0
45	196.6	103.7	4.08	144	5.5	12.23	0
45	160.8	105.4	4.13	123	3.4	5.51	0
45	188.8	96.9	4.75	111	6.8	4.53	0
45	156.4	102.9	4.45	69	4.2	7.71	0
45	158.2	105.8	3.09	62	2.6	2.96	0
45	245.8	101.5	5.33	151	6.3	12.51	0
45	242.2	104.7	5.15	197	7.4	6.41	0
45	208.6	104.7	5.28	111	4.8	17.74	0
45	249	103.7	5.19	80	6	30	0
45	160.6	100.9	4.52	175	7	0.925	0
45	225.4	102.2	3.9	54	7	6.32	0
45	195.6	101.3	4.59	123	6.9	5.02	0
45	116	101.9	4.84	96	3.8	0.8	0
46	289.37	101	4.4	101	6.4	22.94	1
46	201.6	101	4.6	115	9.8	14.17	1
46	284.6	98.7	4.05	140	4.8	10.76	1
46	197.8	100.4	3.92	89	4.1	4.37	1
46	165.9	101.6	4.62	99	7.6	42.1	1
46	330.6	98	4.4	98	7.9	31.8	1
46	246.2	99.9	8.37	72	8.5	15.63	1
46	187	105.2	4.05	108	5.1	6.77	1
46	180.6	105.2	4.09	43	4.7	36.23	1
46	162.2	104	3.84	76	4.3	22.47	1
46	191	97.5	3.52	127	4.1	14.93	1
46	119.4	101.2	3.98	64	5	3.05	1
46	233	102.4	4.72	177	6.9	7.63	1
46	189	91.5	3.31	151	8	16.02	1
46	212.2	99.1	4.16	152	5.1	14.35	1
46	241.2	96.9	4.75	164	7.4	20.95	1
46	232.2	98.4	4.41	116	5.2	13.79	1
46	201	100.3	3.86	95	4.6	5.89	1
46	158.8	100.1	4.53	73	4.2	8.94	1
46	222.5	102	4.3	141	5.5	19.58	0
46	288.7	101	4.1	110	4.5	8.81	0
46	230.91	102	4.5	147	6.8	7.9	0
46	154.8	97	4.3	133	3.3	2.9	0
46	267.2	100	4.2	209	7.8	14.32	0
46	219.6	99	4.5	173	5.9	7.05	0
46	123	96.2	4.52	50	4.3	1.57	0
46	227.8	104.6	4.59	143	4	12.87	0
46	191	103.6	4.29	107	5.3	5.91	0
46	165.4	107.1	5.04	116	4	24.79	0
46	199.4	102	4.3	103	6	4.85	0
46	165.6	107	4.91	108	4.6	4.55	0
46	209.4	103.9	4.26	93	5.1	54.96	0
46	137.4	101.2	4.36	50	3.9	2.2	0
46	202	101.3	4.04	138	6.6	11.36	0
46	145.2	102.4	4.69	198	4.6	6.44	0
46	185.8	98.2	4.52	150	7.1	5.55	0
46	309	100.3	4.41	186	5.6	33.85	0
46	134.3	91.3	4.11	77	4.6	2.15	0
46	122.8	97.4	3.84	182	8.2	0.608	0
46	245.2	102.5	4.27	142	4.7	20.68	0
46	228.6	103.1	4.17	79	5.6	21.52	0
47	298.9	103	4.1	150	5.8	17.43	1
47	216.8	101	4.2	138	8.2	20.55	1
47	279	97	4.1	132	5.4	5.51	1
47	168.8	100	3.8	98	7.8	5.83	1
47	186.2	103	4.2	143	5.3	6.95	1
47	229.4	101	4.2	96	8.6	10.72	1
47	393.4	98.3	7.34	73	11.3	68.45	1
47	221	109	5.5	138	6.2	10.8	1
47	154.4	97.4	3.51	91	2.4	5.24	1
47	294	99	4.98	141	7.2	19.68	1
47	180.8	105.8	3.34	73	6.2	8.26	1
47	233.2	99.9	4.59	78	4.4	6.13	1
47	148.8	102.7	4.14	97	1.7	29.42	1
47	125	97.7	3.69	97	4.7	5.35	1
47	207	101.6	4.14	163	6.4	8.35	1
47	213.6	99.6	4.27	114	6.2	13.22	1
47	206.5	102	4.5	92	5.8	7.44	0
47	179.6	102	4	134	4.6	6.46	0
47	253.5	103	4.3	119	4.9	13.48	0
47	205.8	100	25.9	138	4.8	3.88	0
47	112.2	101	4.3	63	4.1	1.57	0
47	157	98	4.1	146	5.4	7.46	0
47	221.2	107	4.3	153	5.3	6.83	0
47	127.4	104.1	4.47	133	5	5.04	0
47	329	94.9	4.43	116	5.1	16.98	0
47	184.2	98.5	4.38	120	5.5	7.94	0
47	166.6	101	4.75	74	5	13.65	0
47	152	100.7	4.37	42	5.4	8.15	0
47	182.4	107.4	4.72	114	5.7	34.1	0
47	184	92	4.16	104	4.8	41.62	0
47	146.2	102	3.83	92	3.6	1.55	0
47	299.6	101.8	3.9	94	5.2	5.11	0
47	167.4	98.5	4.42	190	3.9	5.31	0
47	190.8	104	4.21	136	4.9	7.22	0
47	212	107.6	4.29	81	4.9	14.64	0
47	182.6	99.8	4.84	57	7.8	8.78	0
47	160.6	100.5	4.77	88	6.7	27.07	0
47	234	100.2	5.18	118	4.3	7.8	0
47	223.2	104.8	5.74	106	4.7	8.56	0
47	158.6	101.7	4.33	155	4.5	4.96	0
47	189.2	101.2	3.49	106	4.6	8.68	0
47	146	104.9	4.36	106	3.6	3.35	0
47	188	101.7	4.34	152	4.3	1.44	0
47	136.4	100.2	4	74	6.5	1.9	0
47	203.6	99.6	4.45	159	7	7.03	0
48	156.3	98	5.7	68	6.5	6.22	1
48	190.6	97	4.3	147	5.5	12.14	1
48	369	97	4.3	125	7.8	14.21	1
48	145.4	108	4.9	70	6	7.1	1
48	213.8	94	3.8	100	5	8.87	1
48	174.6	100	4.3	107	4.8	15.19	1
48	140.6	108	4.1	57	6.3	2.72	1
48	262.2	97.2	3.46	139	8.1	24.37	1
48	248.9	100.3	4.02	173	5.7	19.61	1
48	226.2	101.7	4.94	108	4.8	26.14	1
48	198.4	106.8	3.97	109	5.2	48.27	1
48	298	100.6	3.99	108	7.3	11.13	1
48	256.2	100.9	3.72	140	4.1	6.57	1
48	168.6	101.3	3.95	26	6.7	1.51	1
48	166.5	122.7	4.65	99	5.5	0.409	1
48	233.2	129.6	4.53	114	9	7.21	1
48	148.2	105.2	4.47	58	8.4	22.73	1
48	136.8	98.2	5.3	122	5.7	13.57	1
48	161.2	99.6	4.19	162	5.5	3.93	1
48	192.5	102.7	4.75	141	4.7	4.16	1
48	273.9	95.7	4.85	192	5.1	12.2	0
48	167.8	98	3.9	139	3.2	4.88	0
48	168.3	104.5	3.88	144	5.4	7.3	0
48	189	97.5	4.96	148	5.6	2.08	0
48	109	103.3	4.07	94	3.5	10.54	0
48	216.4	103.6	4.14	101	5.9	7.31	0
48	153.8	104.3	4.79	87	9.3	3.1	0
48	120.4	98.7	4.66	123	4.3	3.89	0
49	293.02	101	4	127	7.9	16.66	1
49	285.8	92	3.8	91	7.5	9.49	1
49	125.2	97	4.5	111	7.7	6.83	1
49	215.2	100	3.6	58	6.5	43.56	1
49	265	102	4.2	72	8.2	12.57	1
49	109.6	98.3	4.95	57	8.4	2.91	1
49	120	100.7	3.99	55	4.9	1.64	1
49	359.6	99.3	4.17	217	7.8	43.92	1
49	172.2	100	3.7	108	4	7.46	1
49	183	102.7	4.83	119	5.9	6.99	1
49	161	95.2	5.39	100	7	1.31	1
49	172.8	100	4.4	110	4.4	24.3	1
49	161.6	101.7	4.42	112	8.8	0.695	1
49	367.7	106.4	4.74	151	8.3	6.7	1
49	116.8	104.2	3.98	78	3.1	9.62	1
49	156.8	105.3	4.06	147	2.4	1.79	1
49	227.4	98.1	4.06	128	7.6	25.13	1
49	143.8	94.4	3.49	184	3.5	14.48	1
49	187.6	102.9	3.99	96	5.8	9.45	1
49	202.2	102	4.3	82	6.6	4.21	0
49	103.9	103	3.8	120	3.7	2.04	0
49	219.2	99	4.5	158	7.6	6.58	0
49	154.1	104	4	159	5.4	7.01	0
49	208.6	94	4.6	124	5.1	6.01	0
49	274	103	4	139	6.2	15.55	0
49	188.2	101	5	112	7.4	6.44	0
49	126.2	98.3	4.12	92	3.5	3.21	0
49	167	104.2	4.49	58	9	8.95	0
49	149.2	104.5	4.05	71	3	2.58	0
49	187.4	101.9	4.79	198	4.6	23.66	0
49	234.2	99.7	3.99	136	4.4	13.23	0
49	196.8	99.1	3.99	181	3	8.2	0
49	98.8	101.6	4.44	31	4.9	0.8	0
49	157.6	103.9	4.65	96	2.4	2.95	0
49	159.2	99.6	5.35	75	5.8	1.86	0
49	197.5	99.7	4.76	103	7	7.36	0
49	192	103.9	4.78	71	5.6	17.33	0
49	212.4	103.4	4.37	137	4.9	5.71	0
49	163.2	100.9	4.1	168	7.1	7.66	0
50	195	97	4.9	111	5.2	7.8	1
50	220	97	4.1	65	6	2.72	1
50	191.4	99	3.4	83	11.9	17.22	1
50	186.4	122.2	4.65	187	4.3	13.43	1
50	162	105.1	5.3	112	4.1	4.9	1
50	99.4	83.4	3.29	91	2.6	3.66	1
50	140	102.3	5.39	92	7.7	6.95	1
50	203.4	99.4	3.61	186	4.4	18.93	1
50	233	100	4.19	151	6.9	9.99	1
50	294.6	96.8	4.34	184	9.6	7.67	1
50	231	103.9	3.62	107	6.3	6.17	1
50	210.4	102.7	5.03	86	5	5.5	1
50	142	102.9	5.42	88	8.2	1.79	1
50	137.6	101.5	4.24	130	4.2	3.18	1
50	192.6	94.2	4.33	84	7.1	21.08	1
50	182.1	107	4.6	63	5	11.82	0
50	172	101	3.8	114	4.8	2.34	0
50	137.2	111	5.2	122	5	2.43	0
50	180.8	104.1	4.38	139	4.7	7.08	0
50	154.4	98.2	4.16	158	3.8	4.47	0
50	235	102.4	4.87	127	5.7	22.26	0
50	157.3	103.8	4.74	73	4.7	0.677	0
50	165.8	106.2	4.38	96	7.8	11.77	0
50	177.2	100.8	5	134	4.9	3.33	0
50	176.8	101.1	3.93	77	7.3	0.761	0
50	218.2	99.4	4.39	129	6.1	13.33	0
51	133.9	102	4.8	68	2.4	3.3	1
51	278.1	102	3.8	118	7.4	15.63	1
51	207.9	105	4.5	99	7.2	12.49	1
51	274.8	92	2.8	70	7.3	5.69	1
51	140.2	100	4.8	154	4	6.16	1
51	219	102	4.4	112	5.5	11.13	1
51	197	101	3.5	130	4.9	11.21	1
51	172.2	100	4.6	82	3.2	5.51	1
51	160	104.3	4.29	104	6.6	10.38	1
51	214.2	99.4	3.76	33	6.4	25.88	1
51	167	96.2	4.21	128	6	18.24	1
51	247.6	101.3	4.5	108	5.5	7.28	1
51	168.5	98.2	3.96	78	7.7	15.52	1
51	212.2	105.3	5.13	155	5.8	7.44	1
51	110.6	97.4	5.2	123	6.1	7.58	1
51	162.2	104.2	4.23	59	6.5	5.49	1
51	180	101.4	4.53	97	4.3	2.94	1
51	150	100.4	3.48	85	4.6	6.72	1
51	187	104.9	4.34	110	4.5	12.33	1
51	177	107.6	4.17	102	6.4	28.23	1
51	137.4	39.5	1.7	124	4.4	6.74	1
51	184.2	98.8	3.12	93	6.7	7.6	1
51	136	94.6	4.15	16	5.2	3.24	1
51	184.2	101.1	4.88	109	5.5	43.62	1
51	156.4	95.1	4.11	87	3.7	11.6	1
51	194.26	101	4.8	69	5.5	7.75	0
51	234	103	4.4	123	3.7	13.71	0
51	134.1	105	4.7	119	2.4	3.36	0
51	230	103	4.5	149	5.2	12.51	0
51	277.3	99	4.3	70	3.6	20.05	0
51	144.57	102	4.2	83	4.1	4.42	0
51	167	106	4.7	167	2.8	7.16	0
51	256.2	100	4.3	222	6	8.36	0
51	143.8	98	4.2	146	4.8	4.73	0
51	179	100	4.4	176	4.7	12.14	0
51	264.8	95.1	4.41	108	3.8	11.57	0
51	216.2	111	4.3	169	4.9	4.96	0
51	109.4	99.8	4.55	98	4.1	9.06	0
51	195.2	100.7	4.64	95	7.8	3.39	0
51	152.4	100.5	3.83	91	6.4	1.71	0
51	166	106.7	3.96	65	6	2.73	0
52	176.4	102	3.5	161	6.1	41.04	1
52	190	100	4	160	4.8	12.87	1
52	126.4	102.6	4.65	69	7.5	8.99	1
52	114	97.4	4.09	203	3.6	2.52	1
52	201	99	4.6	66	5	5.56	1
52	183	104	4.29	128	7.3	5.13	1
52	161.8	99.9	4.08	147	6.8	5.59	1
52	153.4	106	4.48	111	6.4	1.49	1
52	176	106.7	3.71	117	6.5	0.761	1
52	163.6	95.8	4.56	100	7.2	0.536	1
52	306	99.4	4.04	146	10.2	21.31	1
52	190.8	102	4.19	106	6	8.83	1
52	143.4	103.1	4.41	90	5.9	8.38	1
52	209.99	102	4.5	119	6	6.33	0
52	117	99	19.4	54	4.9	19.43	0
52	186	105.8	4.46	164	4.2	9.34	0
52	197.4	106.5	3.98	117	5.5	19.36	0
52	240.6	105.4	4.09	83	5.7	15.31	0
52	151.6	100.5	4.44	146	4	4.28	0
52	127	100.1	4	113	2.6	0.255	0
52	223	106.7	4.26	144	6.9	13.58	0
52	159.6	101.5	4.76	82	3.4	40.32	0
52	167	103.8	8.26	106	5	1.88	0
52	198	100.2	4.62	183	8.4	10.34	0
53	233.44	100	4.1	168	5	20.66	1
53	158.2	100	5.1	117	5.9	0.397	1
53	111.6	99	4.3	73	5.1	5.6	1
53	154.6	95	4.5	85	5.9	13.6	1
53	141.6	96	4	148	5	5.32	1
53	129	97.9	3.65	78	5.3	5.93	1
53	185.6	97.7	4.24	63	6.4	33.82	1
53	233.6	107.9	4.59	94	8.5	13.13	1
53	167.6	102.6	4.89	118	6.7	9.64	1
53	195.2	102.6	5.2	65	7.4	5	1
53	224.2	99.6	4.25	98	7.7	9.74	1
53	224.4	102.4	4.31	85	6.6	236.7	1
53	128.4	100.9	3.98	140	5	3.25	1
53	226.6	103.5	3.76	181	6.2	18.84	1
53	190.2	99.1	4.41	112	4.7	1.74	1
53	120.2	96.6	4.14	145	6.2	5.76	1
53	336.6	105	4.3	124	6.6	12.92	0
53	213.2	100	4.2	154	4.5	11.87	0
53	214	102	4.72	150	6.4	53.22	0
53	150.6	99.5	4.21	72	5.5	13.25	0
53	175	106.8	4.28	127	3.7	15.02	0
53	118.6	96.4	5.07	102	6.4	1.6	0
53	198.8	97.8	3.84	110	5.4	26.12	0
54	156	99	3.2	154	7.7	15.52	1
54	231.4	101	4.7	111	5	17.07	1
54	155.2	95	4.2	82	5.1	14.29	1
54	189.1	99	4.4	185	6.2	19.72	1
54	257.8	99.9	4.23	122	4.7	15.71	1
54	208.2	99.5	3.58	160	4.9	9.76	1
54	173	100.5	4.09	75	4.8	11.38	1
54	140	100.5	4.4	137	6.9	3.09	1
54	179.8	100	4.44	91	6.9	12.57	1
54	180.8	95.8	3.72	78	3.8	16.54	1
54	140.4	104.2	4.1	72	10.5	43.99	1
54	130	97	4.66	119	4.3	5.66	1
54	145.2	102.9	3.6	79	5.6	16.8	1
54	246.2	100.4	6.34	162	8.1	16.03	1
54	175.4	100.6	4.03	81	5	4.5	1
54	152.8	101.6	4.63	102	4.6	42.1	1
54	272.4	97.3	3.52	95	5.6	7.36	1
54	202.3	95.7	4.15	121	5.7	13.89	1
54	168.4	96.6	4.73	95	6	5.26	1
54	271.4	97.4	4.31	170	4.7	10.76	1
54	169	95.3	3.27	108	9.3	16.32	1
54	170.4	99.8	4.06	70	6.4	21.74	0
54	184.6	99.3	3.98	221	4.7	9.72	0
54	131.4	98	4.36	84	3.5	17.31	0
54	145.6	100.4	3.94	79	6.3	9.83	0
54	255.4	100.7	4.39	127	5.1	15.04	0
54	204.2	99.7	3.86	115	7.2	6.54	0
54	179.6	104.8	3.93	138	4.6	6.17	0
54	221.4	102	4.47	119	9.1	9.71	0
55	188.3	105	3.9	160	4.4	7.08	1
55	200	97	3.7	128	5.5	6.87	1
55	238.6	101	4.1	150	3.9	27.46	1
55	238.8	103	4.4	104	6.5	34.33	1
55	230	100.3	3.93	104	8.4	15.3	1
55	281	100.3	4.5	109	7.2	31.44	1
55	231.6	102.2	4.27	171	3.2	7.65	1
55	179.4	102.6	4.51	92	7.9	5.77	1
55	295.8	102.8	4.69	121	5.9	10.34	1
55	314.5	103.5	4.15	39	8.6	52.05	1
55	130.2	102.1	4.34	98	3.7	5.71	1
55	207.8	108.8	5.9	158	6.8	22.1	1
55	247.4	99.2	4.07	82	9.1	14.95	1
55	237.6	103.8	4.52	127	5.9	24.25	1
55	180	106.8	3.79	143	5	4.4	1
55	267.6	100.8	4.41	191	8.1	17.13	1
55	142	105.4	4.94	68	10	12.41	1
55	208	90.7	3.56	99	9.6	76.71	1
55	150.7	102	4.1	148	4.8	10.62	0
55	194.99	102	4.5	110	5.2	2.55	0
55	201	95	4.1	106	6.7	6.06	0
55	255	101	3.6	91	5.7	13.78	0
55	332	98.5	4.87	74	4.3	17.69	0
55	154.8	101.2	3.95	203	4.8	7.55	0
55	206.2	102.6	3.78	164	5	43.79	0
55	154.6	106.5	4.41	74	4.1	2.96	0
55	154.4	99.6	4.36	91	4.2	16.67	0
55	245.6	102	5.24	128	5	6.25	0
55	151	99.7	5.14	160	5	4.48	0
55	151.4	100.9	4.01	150	3.4	9.92	0
56	314.1	99	4.4	91	6.3	41.41	1
56	199.8	100	3.7	102	4.3	8.18	1
56	108.4	87	3.6	57	9.6	2.62	1
56	194.8	98	3.5	87	6.1	14.98	1
56	258	102	3.9	64	5.9	15.16	1
56	261.6	80.5	2.7	135	3.9	7.98	1
56	159	103.8	4.1	86	4.2	51.16	1
56	173	98.8	4.63	137	6	0.48	1
56	173.4	99.9	4.9	102	4.7	8.95	1
56	169	104.3	4.35	209	4	14.28	1
56	138.6	90.5	4.52	99	3.5	0.443	1
56	213.4	96	3.78	123	7.2	7.9	1
56	161.6	98.7	4.28	42	5.1	5.2	1
56	151.4	103.4	4.15	106	3.5	10.26	1
56	189	100.4	4.25	107	5.8	4.14	1
56	191.1	101	4	118	4.8	4.28	0
56	177.28	101	4.3	185	7.3	5.52	0
56	128.5	102	4.4	175	3.9	6.68	0
56	146.4	112	3.8	140	4.3	0.233	0
56	128.2	99.6	4.65	177	5.8	15.05	0
56	167.2	101.4	3.89	46	6.5	12.3	0
56	153	100.3	4.82	90	6	10.97	0
56	158.8	100.7	4.36	103	4.1	2.65	0
56	154	104.9	3.83	129	4.8	5.74	0
57	220.74	104	4.8	118	4.7	17.02	1
57	209	101.6	4.01	146	5.9	5.84	1
57	156.6	94.7	3.1	113	9.7	18.39	1
57	189.6	100.6	5.79	99	5.7	17.01	1
57	199.8	101.3	4.47	231	2.4	5.8	1
57	162	98.6	4.87	186	5.3	2.09	1
57	190.4	103.7	4.59	96	5.8	34.85	1
57	136.6	101.7	4.39	165	6.8	3.49	1
57	168.2	98.4	3.87	154	9.3	20.09	1
57	196.2	101	5.42	126	9.1	8.87	1
57	208	102.3	4.18	181	7.2	5.46	1
57	175.8	101.6	4.08	140	5.8	11.75	1
57	180.6	101	4.8	115	4.9	4.46	0
57	155.8	103.5	3.99	95	4.9	1.73	0
57	168.6	101.6	4.57	147	5.7	5.8	0
57	163.2	100.6	4.65	109	6.5	11.47	0
57	124.6	103.2	3.47	88	3	1.96	0
57	152.4	99.7	4.53	167	6.4	3.06	0
58	271.78	105	4.4	188	6.5	19.83	1
58	183.09	102	3.6	120	7	16.32	1
58	212	101	3.9	200	6.5	11.26	1
58	210.26	99	5.1	154	6	15.76	1
58	215.4	98	3.9	89	5.6	6.57	1
58	193.2	98.5	4.26	205	5.8	8.7	1
58	218	102.4	3.96	207	6.3	30.48	1
58	187.4	100.9	5.02	83	5.6	22.56	1
58	180.8	100.3	4.12	71	7.4	9.03	1
58	174.4	104.4	4.72	92	5.6	14.53	1
58	174.4	101.7	4.77	101	4.8	10.6	1
58	234.4	102.2	4.51	110	6.9	10.7	1
58	163.2	106.2	4.77	112	5.6	7.28	1
58	214.2	99.7	3.8	130	7.8	26.42	1
58	216	101.4	5.1	74	11	12.68	1
58	209	103	4.4	173	5.9	30.79	0
58	240.6	102	4	89	6.3	8.23	0
58	162.87	95	3.8	114	4.7	3.89	0
58	258	101	4.9	126	4.8	12.02	0
58	132.6	102	5	126	4.2	3.57	0
58	184	106	5.2	118	6.9	0.261	0
58	115	99.6	4.78	90	5.7	6.93	0
58	207.2	101.3	3.89	146	6.6	17.35	0
59	144	97	4.1	214	7.9	18.81	1
59	177.8	100	4.5	133	4.9	7.29	1
59	224.5	99	4.3	150	4	13.26	1
59	159	106	4.3	163	3.4	2.1	1
59	144.8	105.8	3.96	51	4.8	18.38	1
59	153.4	99.3	3.01	127	6.4	15.73	1
59	213.2	98.1	3.82	144	8.9	7.24	1
59	166.2	101.4	3.84	163	3.8	14.62	1
59	209.8	104.8	4.13	132	4.4	62.5	1
59	189.6	102.5	4.17	76	4.6	5.97	1
59	192.6	104.9	4.5	134	3.4	2.7	1
59	192	109.9	4.33	210	6.9	6.48	1
59	153	126.1	5.74	64	9.1	6.96	1
59	148.2	101.7	3.42	61	3.8	8.95	1
59	145	100.7	3.48	92	8.4	27.93	1
59	196.6	96.7	3.73	67	6.1	9.16	1
59	103.6	98.3	3.78	112	3.3	3.68	1
59	186.6	100	4.54	54	8.2	13.44	1
59	208	98.9	3.6	121	7	7.37	1
59	118.6	105	4.13	76	6.3	1.8	1
59	197	100.3	4.22	99	5	6.32	1
59	213.6	98.5	3.29	81	6.1	15.46	1
59	153.2	103	4.3	150	3.7	10.57	0
59	199	102	4.3	161	5.9	6.43	0
59	172.6	100.4	4.73	66	8.1	2.62	0
60	188.98	110	5.1	87	5.4	3.07	1
60	140	102	4.9	158	6	0.67	1
60	238	102	4.5	101	6.4	15.83	1
60	246.4	100	4	195	4.4	13.72	1
60	147.5	75	3.1	101	3.3	9.77	1
60	167	103.1	4.73	178	4.3	8.17	1
60	165.6	95	4.6	137	2.8	12.51	1
60	132.8	101	4.9	107	5.3	3.12	1
60	172.2	95.9	4.71	83	6.4	11.81	1
60	183.4	96	3.22	111	4.4	1.18	1
60	136	99.7	3.71	79	3.3	8.53	1
60	216	101	4.3	89	4.6	11.49	0
60	145.4	100	4.5	116	3.4	5.72	0
60	145.8	99.4	4.58	119	5.6	7.3	0
60	168	98.8	4.97	174	6.7	25.1	0
60	172.2	105.2	4.39	128	4.3	5.3	0
60	157.2	100.6	4.45	130	5.9	1.89	0
61	157.6	102	4.5	130	4.2	2.75	1
61	180.4	101	4	209	4.9	8.54	1
61	162.4	101.1	4.34	149	6.8	5.82	1
61	283.6	101.9	4.02	100	6.2	11.22	1
61	156	99.2	4.92	99	3.9	11.73	1
61	183.4	103	5.15	153	7.3	4.21	1
61	204.4	105.1	4.23	117	8.3	8.53	1
61	161.6	102	5.2	94	8.5	8.16	1
61	247.9	100	4.4	137	4	20.29	0
61	195.93	100	4.6	148	5.9	11.8	0
61	216	99	4.1	130	3.6	8.59	0
61	170	101	3.9	173	4.8	1.79	0
61	108	92.3	4.57	50	3.7	4.11	0
61	217.2	100	4.13	197	5.9	9.92	0
61	172.6	102.1	4.95	63	6.3	24.53	0
61	178.6	125.8	5.81	168	9.7	4.92	0
62	170.26	100	4.2	108	5.4	6.55	1
62	179.2	107	4.3	172	6.7	12.67	1
62	184.4	101	4.3	126	7.3	7.66	1
62	151.4	102.1	9.88	56	5	12.9	1
62	152.4	94.6	3.87	89	5.6	10.26	1
62	167	97.8	3.85	192	5.3	14.37	1
62	164	104.9	4.64	143	6	6.69	1
62	138.6	100	3.3	112	5.2	24.15	0
62	292.3	102	4.2	93	6.1	11.35	0
62	174	101	3.98	94	5.9	7.51	0
62	294.8	104.4	4.74	72	7.3	13.47	0
63	263.3	103	4.9	60	5.7	10.33	1
63	315.3	102	4.2	129	4.9	20.98	1
63	191.01	101	4.1	132	4.7	2.63	1
63	131.7	100	3.8	159	3.7	5.8	1
63	188.6	95	4	160	7.4	13.42	1
63	202.4	103	4.3	83	5.2	7.07	1
63	118.8	97	4.5	96	8	8.76	1
63	243.2	99	3.9	159	6.1	16.39	1
63	198.6	103	4.4	103	5.4	4.42	1
63	140.6	101.2	3.9	131	4.9	4.31	1
63	141.8	105.8	4.7	81	3.2	7.21	1
63	172	100.8	4.28	144	3.2	13.83	1
63	125	96	3.5	143	6.8	3.64	1
63	136.2	100	4.4	106	4.3	2.46	0
63	106.5	97.8	4.51	158	3.6	3.27	0
64	175.4	102	5	191	4.2	11.38	1
64	190.2	104	4.9	107	6.9	6.17	1
64	200.4	101.4	4.29	151	5.1	9.89	1
64	173.6	102.9	4.06	92	5.2	1.86	1
64	228.4	102.3	5.55	61	5	71.36	1
64	178.8	104.4	4.94	130	7.6	16.37	1
64	249.1	100.5	4.75	123	7.2	19.39	1
64	165	101.8	4.67	70	6.9	1.51	1
64	205.8	99.7	3.49	184	3.6	4.7	1
65	131.6	102	4.2	152	6.4	2.17	1
65	214.49	99	4.8	110	6.8	4.83	1
65	167.2	100	3.9	105	5.4	14.99	1
65	139.2	101	4.5	166	5	3.18	1
65	192	124	4.5	76	7.1	8.93	1
65	220.8	107	4.9	142	10	9.82	1
65	192.5	104.3	4.35	102	6.5	3.11	1
65	163.2	97.5	5.2	157	5.7	21.57	0
66	161.97	102	4.3	147	4.6	3.73	1
66	221.04	103	4.8	184	10.8	5.06	1
66	194.4	101	4.4	90	5.2	14.18	1
66	171.4	99.3	3.81	138	6.4	22.02	1
66	245.4	101.8	4.33	122	4.8	13.97	1
66	126.2	99.4	4.66	64	5.5	0.368	1
66	166.8	99	4.77	99	3.9	1.4	0
67	151.6	101	4.5	147	5	3.32	1
67	173.8	103	4.4	244	7.5	5.24	1
67	332	102.8	5.06	69	6.5	18.26	1
67	181.8	102.5	3.66	157	7.2	6.45	1
67	150.7	106	4	170	7	8.03	0
67	166.3	111	4.6	253	4.7	5.71	0
67	151.84	103	4.9	223	6.6	16.15	0
67	172.8	104.7	3.95	85	6.1	7.63	0
68	192.9	102	4.7	130	7.6	15.67	1
68	190	104	4.5	126	4.8	9.88	1
68	236	94	2.9	155	5.6	6.96	1
68	161.6	104	3.9	97	5.8	11.85	1
68	151	101	4.2	131	5.3	18.49	1
68	164.2	105.4	5.04	117	7.7	9.6	1
68	198.8	102.6	4.73	72	5.5	15.77	1
68	165.8	98.3	3.72	123	7	18.52	1
68	169.6	102.5	4.51	87	6.4	9.92	1
69	121.32	105	3.9	133	3.8	3.68	1
69	184	94	3.7	134	4.5	10.12	1
69	217	71	3.5	71	4.7	13.93	1
69	160.2	108.2	4.45	46	6.4	9.57	1
70	219.6	104	4.2	135	5.7	18.85	1
70	160	78	4	109	4.6	11.06	1
70	211.6	108	4.6	202	11.3	14.44	1
70	182.2	104.6	3.89	122	7.3	20.97	1
70	173	103.5	4.43	91	6.5	7.02	1
70	265.2	101.1	3.63	99	11	13.52	1
70	170.9	95	4.5	153	4.6	8.91	0
71	228.74	104	3.4	114	5.5	3.42	1
71	114.68	99	5	97	4.7	5.15	1
71	165.4	96	3.9	195	3.9	4.34	0
71	140.2	103	4.4	185	5.2	3.54	0
71	180	98.7	4.04	185	4.1	10.94	0
72	168.9	87	4.6	145	3.6	6.93	1
72	152.2	97	4.2	124	4	6.88	1
72	205.8	103	8.7	178	8.3	5.52	1
72	105	100	3.9	161	3.9	2.28	1
72	185.4	102	4.4	84	5.1	13.68	1
72	173.8	100	3.97	79	10.6	4.69	1
72	305.8	99.1	4.77	116	6	17.42	1
73	192.7	103	5.1	261	6.9	7.39	1
73	163.7	104	3.4	135	8.7	14.53	1
73	224	100	5	121	5	8.05	1
73	169.4	101	4.34	88	5	2.53	1
73	157.7	99	4.4	183	5	4.32	1
73	128.3	102	4.9	154	4.9	4.45	0
74	185.5	101	4.3	62	6.8	32.28	1
74	145.4	104	4.6	101	6.8	3.55	1
74	239.2	101	4.1	179	7.6	9.8	1
74	167.8	101.1	4.35	115	4.7	0.892	0
75	145.6	98	3.6	212	7.2	10.88	1
75	215.76	102	4.7	104	6.2	8.51	1
75	179.8	97	4.1	203	7.9	4.16	1
75	168.2	102	4.9	190	7.7	18.87	1
76	140.4	101	4	102	4	2.83	1
76	136.2	105	3.9	103	9.6	3.7	1
76	163.6	101	4.7	205	6.5	5.07	1
76	157.4	99.3	3.41	114	6.5	5.44	1
77	164.36	105	4.6	110	5.3	11.37	1
77	174	98	4.2	119	6.4	16.64	1
77	154.6	104	3.7	100	4.3	3.96	1
77	165	98.9	4.88	39	7	21.15	1
78	120.7	88	3.8	109	2.9	6.38	1
78	178.8	101.4	3.96	110	4.4	5.99	1
78	130.2	97.3	4.81	101	3.1	7.81	1
78	225.6	105.2	4.68	75	4.5	13.5	1
79	170.2	103	4	120	5.2	3.03	1
79	140	101	4.6	123	4.7	4.07	1
79	171.2	102.5	3.8	80	6.8	5.24	1
80	205.8	103	5.2	102	6.2	20.17	1
81	138.8	99	4.9	54	5.8	3.25	1
81	152.65	107	5.4	108	5.3	16.53	0
83	169.6	101	4.7	100	8.4	5.06	1
83	157	101	4.7	109	4.7	7.33	0
83	165.2	103.4	4.78	96	4.2	3.97	0
84	160.4	90	4.2	218	4.2	10.28	1
85	127.1	98	3.4	124	7.4	10.27	1
85	184	98	4.2	158	4	6.93	1
85	177.2	100	4.2	105	6	6.52	1
86	133.51	97	6.5	80	6.8	4.89	1
87	186.6	101.3	3.64	98	7.4	21.11	1
87	203.8	101	4.4	106	8.3	28.89	0
88	116.9	97	5.2	75	5.5	4.33	1
