# Supplementary material for: Time-to-event modeling of hypertension reveals the nonexistence of true controls
Source: eLife. 2020 Dec 1;9:e62998. doi: 10.7554/eLife.62998 (PMC7707825; doi:10.7554/eLife.62998)
Supplement: Supplementary file 2. [file elife-62998-supp2.xlsx]

## Sheet: NHANES
Supplementary File 2: Source data for the National Health and Nutrition Examination Survey
BMXWT	BPQ020	BPQ040A	BPXDI1	BPXDI2	BPXDI3	BPXDI4	BPXSY1	BPXSY2	BPXSY3	BPXSY4	LBDLDL	LBXIN	LBXSCLSI	LBXSKSI	LBXSUA	RIDAGEYR	RIAGENDR	RIDRETH1	SDMVPSU	SDMVSTRA	WTSAF2YR
35.2	NA	NA	60	60	60	NA	88	90	90	NA	84	5.03	102.8	4.21	4.4	12	2	1	1	4	8169.08
47.6	NA	NA	64	60	60	NA	94	88	88	NA	122	18.75	102.3	4.37	5.5	12	2	1	2	13	4732.9
31.1	NA	NA	56	58	64	NA	94	92	90	NA	99	2.96	103.7	4.04	3.4	12	1	1	2	6	5308.3
73.9	NA	NA	44	46	50	NA	94	94	94	NA	60	10.58	100.4	4.18	4	12	1	1	1	6	6774.68
61.5	NA	NA	64	60	60	NA	96	94	94	NA	117	15.49	104.5	4.25	6.3	12	1	1	1	3	8128.25
42.1	NA	NA	66	52	56	NA	96	92	98	NA	123	9.89	103.6	4.31	4.3	12	1	1	1	12	5984.55
54.4	NA	NA	NA	64	68	72	NA	94	94	100	64	27.47	102.9	4.01	4.7	12	2	1	1	4	6722.7
59.5	NA	NA	64	72	72	NA	94	98	98	NA	105	22.63	104.1	4.43	6.3	12	2	1	1	12	5501.33
47.8	NA	NA	74	64	60	NA	102	92	98	NA	145	13.21	102.2	3.91	5.3	12	2	1	2	13	5196.05
52.6	NA	NA	64	64	64	NA	98	98	98	NA	84	10.41	101.1	4.08	2.9	12	2	1	2	6	4659.64
42.4	NA	NA	60	64	60	NA	98	100	100	NA	68	11.05	101.4	3.91	3	12	2	1	1	6	5883.65
43.2	NA	NA	62	58	62	NA	102	98	98	NA	101	8.73	99.4	3.95	3.5	12	1	1	2	8	10344.9
34.2	NA	NA	46	NA	48	NA	98	NA	102	NA	61	7.99	98.3	4.49	1.9	12	1	1	1	12	6017.43
80.3	NA	NA	70	72	68	NA	102	98	100	NA	102	40.47	103.1	4.34	4.6	12	2	1	1	10	4868.36
37.2	NA	NA	62	66	66	NA	104	102	102	NA	99	12.18	103.9	4.49	3.2	12	1	1	2	13	5635.24
64.5	NA	NA	60	60	56	NA	104	100	104	NA	111	21.42	99.7	4.17	6.4	12	1	1	1	3	6808.34
53.5	NA	NA	68	72	NA	70	104	104	NA	102	84	6.7	103.3	4.1	4.2	12	2	1	2	2	5415.41
59.5	NA	NA	48	50	52	NA	106	102	102	NA	65	19.18	105.8	4.03	3.8	12	2	1	1	12	5901.52
31.4	NA	NA	60	62	60	NA	106	102	104	NA	71	9.01	102.2	4.13	4.5	12	2	1	1	10	10147
42.7	NA	NA	56	66	62	NA	102	104	106	NA	96	9.22	100.6	4.47	3.1	12	1	1	1	12	6245.25
46	NA	NA	64	64	62	NA	104	102	106	NA	85	7.34	106.3	4.37	3.2	12	1	1	1	12	6369.18
53.8	NA	NA	66	66	68	NA	106	106	100	NA	70	13.14	103.4	3.81	5.1	12	2	1	1	3	6736.63
39.7	NA	NA	66	66	66	NA	102	102	110	NA	89	7.19	106.3	4.42	3.1	12	1	1	1	12	6038.01
54.7	NA	NA	70	64	58	NA	106	104	104	NA	72	8.17	101.4	4.3	6.2	12	1	1	1	3	7445.11
54.84	NA	NA	74	70	70	NA	106	106	102	NA	96	13.74	105	4.44	3	12	2	1	1	3	5423.77
71.1	NA	NA	40	50	48	NA	102	104	110	NA	57	17.63	104.8	3.63	5.1	12	2	1	1	13	6229.44
54.4	NA	NA	NA	64	68	62	NA	110	108	100	94	7.11	102	3.93	3.9	12	2	1	2	13	6691.71
52.8	NA	NA	66	60	62	NA	110	110	102	NA	57	12.13	105.3	4.7	4.5	12	2	1	2	2	7772.05
47.9	NA	NA	50	46	NA	64	112	108	NA	106	59	21.16	101.7	4.3	4.9	12	1	1	1	4	7157.01
46.3	NA	NA	52	56	60	NA	110	110	108	NA	85	6.92	107.2	4.04	4.7	12	2	1	1	5	10326.3
50.54	NA	NA	66	66	64	NA	114	110	104	NA	98	13.49	101.4	4.12	4.6	12	2	1	2	3	5430.75
53.2	NA	NA	66	68	70	NA	112	110	106	NA	85	14.68	105.5	4.12	4.1	12	1	1	1	12	9104.07
45.7	NA	NA	70	76	70	NA	118	110	102	NA	69	8.17	102.1	4.6	4.2	12	1	1	2	6	5153.94
50.3	NA	NA	70	80	76	NA	110	108	112	NA	87	11.54	103.1	4.04	7.7	12	1	1	1	3	7216.81
56	NA	NA	NA	40	56	NA	NA	112	110	NA	64	14.9	102.8	3.95	3.6	12	2	1	1	4	6006.81
37.3	NA	NA	42	46	52	NA	114	114	106	NA	56	4.27	101.1	3.53	5	12	1	1	2	8	9597.48
48	NA	NA	60	60	66	NA	118	110	106	NA	69	11.95	102.5	4.3	4.5	12	1	1	1	3	7352.23
51.3	NA	NA	50	50	42	NA	116	110	108	NA	98	11.33	101.1	3.93	4.4	12	2	1	1	12	7822.2
41.3	NA	NA	72	78	74	NA	112	114	110	NA	106	7.32	103.6	4.19	3.1	12	2	1	2	6	6991.81
55.8	NA	NA	60	54	66	NA	112	116	108	NA	100	17.78	99.3	4.33	2.5	12	2	1	2	6	5387.85
52.7	NA	NA	70	54	72	NA	116	116	106	NA	86	4.47	104.2	4.12	5.9	12	1	1	1	12	5684.07
98.9	NA	NA	60	66	70	NA	114	116	114	NA	128	35.12	103.2	4.78	4.5	12	1	1	1	13	6882.83
93.5	NA	NA	56	60	NA	NA	116	114	NA	NA	72	59.19	106.2	4.47	5	12	2	1	2	2	7772.05
45	NA	NA	64	70	58	NA	118	118	112	NA	110	8.37	101.6	4.03	4.8	12	2	1	2	6	5436.72
47.4	NA	NA	66	60	56	NA	116	118	120	NA	102	16.49	102	3.95	3.5	12	1	1	1	13	4796.9
64.7	NA	NA	60	64	64	NA	120	120	118	NA	133	26.6	100.2	3.93	6.2	12	1	1	1	7	16250.1
92	NA	NA	64	58	60	NA	124	120	116	NA	83	22.91	102.6	4.04	5.3	12	2	1	1	10	10177
58.5	NA	NA	60	72	70	NA	120	120	122	NA	89	17.31	103.1	4.44	4.6	12	1	1	2	6	8103.85
59	NA	NA	64	68	64	NA	122	126	122	NA	68	10.64	102.9	4.04	5.7	12	2	1	1	11	16713.5
93.5	NA	NA	70	68	68	NA	132	130	128	NA	115	30.59	99.2	3.82	7.5	12	2	1	2	6	5461.48
48.9	NA	NA	52	48	46	NA	134	134	124	NA	71	21.4	100.5	4.13	4.8	12	1	1	1	4	7059.19
56.5	NA	NA	NA	NA	NA	NA	NA	NA	NA	NA	84	13.03	104.2	3.94	3.8	12	1	1	2	6	11594.7
52.8	NA	NA	56	50	50	NA	78	82	80	NA	77	5.8	103.1	3.02	5.6	13	2	1	1	4	6513.97
65.6	NA	NA	46	44	50	NA	84	80	86	NA	51	8.64	100.7	4.08	4.5	13	1	1	1	6	6057.05
70.34	NA	NA	64	62	70	NA	90	96	94	NA	109	18.44	102.4	4.57	5.7	13	1	1	2	3	5446.46
52.5	NA	NA	62	58	60	NA	92	96	96	NA	65	13.61	101.8	4.42	2.7	13	2	1	1	13	6166.73
49.2	NA	NA	64	72	68	NA	94	98	98	NA	88	10.65	103.2	4.09	4.7	13	2	1	1	6	7835.85
48.8	NA	NA	66	62	66	NA	100	98	98	NA	85	14.09	105.2	4.27	4.1	13	2	1	1	13	5100.31
92	NA	NA	54	52	54	NA	94	100	102	NA	146	24	101.1	3.99	5.3	13	2	1	2	3	6209.52
37.54	NA	NA	72	76	74	NA	96	104	98	NA	111	5.81	103.2	4.16	4.1	13	2	1	2	3	4497.75
43.8	NA	NA	62	58	60	NA	98	98	104	NA	65	8.18	104.3	4.15	3.3	13	2	1	1	4	6953.79
56.9	NA	NA	50	54	NA	NA	98	102	NA	NA	73	8.93	101.4	4.45	4.9	13	2	1	1	6	8121.05
55.6	NA	NA	NA	58	58	58	NA	100	102	102	96	8.76	103	4.12	4.8	13	2	1	1	13	4173.07
56.54	NA	NA	70	68	72	NA	108	98	100	NA	126	17.59	104.2	4.14	4.8	13	2	1	2	3	4722.64
61.84	NA	NA	60	70	64	NA	104	104	98	NA	119	16.59	101.7	4.04	6.4	13	1	1	2	3	7850.51
37.74	NA	NA	72	72	74	NA	108	102	98	NA	103	9.05	102.5	3.97	3.5	13	2	1	2	3	4497.75
51.3	NA	NA	56	52	62	NA	108	100	100	NA	85	13.27	103.9	4.12	2.7	13	2	1	1	4	6598.84
46.6	NA	NA	80	70	80	NA	104	106	100	NA	122	9.45	103.3	4.22	6.9	13	1	1	1	3	7216.81
44.3	NA	NA	54	54	50	NA	106	106	104	NA	56	4.94	97.5	4.4	6.1	13	1	1	2	6	5880.37
44.3	NA	NA	64	60	66	NA	108	104	104	NA	103	11.83	101.6	4.24	5	13	2	1	2	2	4745.06
59.5	NA	NA	60	64	64	NA	104	104	110	NA	113	7.39	99.7	4.13	5.6	13	1	1	1	6	8836.94
64.1	NA	NA	58	48	66	NA	108	104	106	NA	120	8.3	105.4	3.96	6	13	2	1	2	5	10522.8
65	NA	NA	70	68	64	NA	108	108	104	NA	74	14.05	104.2	4.03	3.4	13	2	1	1	13	5880.63
77	NA	NA	70	72	66	NA	106	110	106	NA	129	40.58	103	4.53	6.4	13	2	1	2	13	4727.62
60.5	NA	NA	60	64	66	NA	108	108	108	NA	117	14.43	104.5	4.21	3.4	13	2	1	1	6	7820.04
55.7	NA	NA	78	84	76	NA	108	110	108	NA	82	12.78	102.8	4.52	5.4	13	1	1	2	3	7520.62
59.7	NA	NA	52	52	50	NA	108	114	104	NA	132	18.36	102.5	3.96	4.6	13	2	1	1	3	8169.08
77.3	NA	NA	50	42	NA	54	108	110	NA	108	108	15.38	107.9	4.09	8.7	13	1	1	1	12	7979.4
52.8	NA	NA	68	68	70	NA	112	110	106	NA	84	20.55	105.1	4.57	5.5	13	1	1	1	13	5232.67
55.2	NA	NA	56	60	46	NA	104	116	108	NA	56	11.29	105.1	4.43	4.8	13	1	1	1	4	7157.01
55.5	NA	NA	52	60	56	NA	112	108	108	NA	65	13.37	104.6	4.36	3.7	13	2	1	2	6	5387.85
87.1	NA	NA	42	56	58	NA	112	110	106	NA	71	24.4	101.8	4.14	6.1	13	1	1	2	13	5036.75
48	NA	NA	58	56	50	NA	110	110	110	NA	84	11.3	104.7	4.22	5.3	13	1	1	1	3	7148.76
83.8	NA	NA	58	64	66	NA	112	112	106	NA	116	20.27	103.3	4.67	6.6	13	1	1	1	10	11634.1
113.14	NA	NA	66	74	78	NA	108	110	112	NA	66	18.61	103.7	3.97	7.7	13	2	1	2	3	6193.16
50.3	NA	NA	72	66	66	NA	114	108	110	NA	83	23.11	106.7	3.9	4.6	13	2	1	1	6	7506.6
69.9	NA	NA	62	54	58	NA	112	110	110	NA	85	13.42	98.4	4.23	7.3	13	2	1	2	6	5421.76
53.4	NA	NA	NA	50	NA	58	NA	108	NA	114	85	9.14	101.5	4.01	4.5	13	2	1	1	4	13476.5
106.4	NA	NA	52	46	40	NA	118	106	112	NA	101	13.43	102.3	4.22	6.3	13	1	1	1	4	8622.22
50.2	NA	NA	NA	70	70	62	NA	112	112	114	66	9.64	102.5	4.6	5.1	13	1	1	1	4	8063.09
69.2	NA	NA	56	NA	56	NA	108	NA	118	NA	114	7.22	103	3.74	4	13	2	1	1	4	6580.03
41.5	NA	NA	48	48	48	NA	116	114	110	NA	93	8.07	99.9	3.83	4	13	2	1	1	4	6885.45
47.4	NA	NA	76	76	74	NA	116	112	112	NA	57	6.41	103.3	4.47	4.8	13	1	1	1	4	7325.1
49.7	NA	NA	52	48	NA	0	114	110	NA	116	66	9.69	101.1	4.01	5	13	1	1	1	4	7995.67
66.2	NA	NA	NA	66	62	58	NA	116	114	110	110	11.29	100.7	4.18	6.5	13	1	1	1	6	11241.9
78.2	NA	NA	68	64	64	NA	114	112	114	NA	96	36.88	103.2	4.23	7.2	13	2	1	1	3	6001.37
83.4	NA	NA	62	58	60	NA	110	116	114	NA	93	14.68	100.6	4.32	5.1	13	1	1	1	3	7520.62
46.2	NA	NA	48	48	40	NA	118	114	114	NA	100	6.36	103	3.92	5.3	13	1	1	1	5	7113.42
50.7	NA	NA	58	52	50	NA	118	114	114	NA	66	14.96	108.1	4.78	5.7	13	1	1	1	5	6992.98
52	NA	NA	60	74	76	NA	112	114	120	NA	67	6.48	102.8	4.53	4.9	13	1	1	1	11	17294.8
68.5	NA	NA	60	62	58	NA	112	114	120	NA	100	14.05	103.2	4.22	6.5	13	1	1	1	5	7049.64
48.5	NA	NA	58	NA	56	62	120	NA	114	114	50	14.16	105.9	4.44	6.8	13	1	1	2	2	6435.88
83.7	NA	NA	72	70	80	NA	120	114	114	NA	79	23.61	101.1	3.81	6.3	13	2	1	2	12	4965.82
85.7	NA	NA	68	58	58	NA	118	114	118	NA	116	20.8	104.8	4.06	7.6	13	1	1	1	13	5531.73
40.1	NA	NA	56	52	56	NA	120	116	116	NA	68	5.93	103.2	4.1	3.9	13	1	1	2	6	4689.59
43.1	NA	NA	NA	80	78	78	NA	118	120	114	65	5.47	101.1	3.99	4.8	13	1	1	2	13	7561.88
56.6	NA	NA	52	58	60	NA	118	120	114	NA	97	11.57	104.7	4.32	5.6	13	1	1	1	12	7765.95
63.8	NA	NA	62	64	74	NA	120	118	118	NA	64	21.14	106.5	4.18	5	13	2	1	2	2	7772.05
95.84	NA	NA	68	66	64	NA	116	120	122	NA	92	16.93	101.8	4.2	6.2	13	1	1	2	3	6723.01
59.7	NA	NA	60	60	60	NA	122	118	120	NA	81	11.18	102.3	3.99	4.9	13	1	1	1	3	6808.34
58.6	NA	NA	50	52	54	NA	126	120	118	NA	111	56.93	100.4	4.23	7	13	1	1	2	10	9116.99
100.4	NA	NA	50	50	NA	NA	124	120	NA	NA	79	56.17	100.6	4	7.4	13	1	1	2	10	5872.16
61.9	NA	NA	52	56	NA	50	118	120	NA	130	139	23.14	102.4	4.58	5.6	13	1	1	2	6	5997.04
50.1	NA	NA	70	54	66	NA	124	118	128	NA	89	18.41	102.4	4.36	5.6	13	1	1	2	10	6299.7
70.7	NA	NA	60	56	68	NA	126	124	122	NA	139	47.51	102.8	3.93	6.2	13	2	1	1	5	13036.6
73.3	NA	NA	NA	52	34	46	NA	130	128	126	77	41.69	103.7	4.21	5.3	13	1	1	2	10	7119.84
42	NA	NA	66	64	60	NA	126	128	134	NA	135	17.75	104	3.84	4.2	13	2	1	1	10	10726.7
87.8	NA	NA	54	54	NA	62	134	128	NA	126	84	15.74	98.7	3.8	7.1	13	1	1	1	4	6706.36
81.4	NA	NA	NA	60	70	NA	NA	132	128	NA	77	24.52	103.6	4.33	5.5	13	1	1	1	4	7176.76
81.5	NA	NA	60	60	68	NA	122	134	142	NA	147	10.25	102.4	4.21	6.8	13	1	1	1	6	7669.75
53.5	NA	NA	NA	NA	NA	NA	NA	NA	NA	NA	103	13.62	103.2	3.94	3.4	13	2	1	1	13	5348.75
57.24	NA	NA	NA	NA	NA	NA	NA	NA	NA	NA	108	7.53	104.7	4.32	5.5	13	1	1	2	3	5887.88
37.5	NA	NA	70	66	66	NA	88	88	98	NA	93	6.56	97.7	3.91	3.6	14	2	1	2	2	4553.17
89.6	NA	NA	64	58	62	NA	96	88	92	NA	160	17.47	100	4.26	6.9	14	1	1	2	3	7016.99
49.3	NA	NA	NA	24	22	22	NA	94	96	96	106	11.06	98.7	4.06	3.9	14	2	1	2	10	6723.48
48.4	NA	NA	NA	66	48	60	NA	96	100	94	70	6.12	103	4.41	3.8	14	2	1	2	5	11071.7
86.2	NA	NA	62	66	62	NA	98	100	96	NA	94	11.8	105.1	4.33	5.8	14	1	1	1	6	6910.73
48.9	NA	NA	66	NA	62	64	94	NA	100	102	81	11.28	103.3	3.97	4.8	14	2	1	1	4	14051.2
53.3	NA	NA	70	64	70	NA	98	102	100	NA	89	5.8	102.4	4.14	3.8	14	2	1	1	3	6937.4
41.7	NA	NA	62	NA	66	66	102	NA	98	102	79	11.72	103.5	4.34	5	14	1	1	1	12	5977.17
44.6	NA	NA	60	56	NA	NA	102	100	NA	NA	97	11.28	105.1	4.3	3.9	14	1	1	1	12	5345.03
41.94	NA	NA	74	76	68	NA	102	104	98	NA	74	6.04	104.4	4.2	5.5	14	1	1	2	3	5887.88
54.9	NA	NA	NA	64	NA	74	NA	98	NA	106	90	23.31	106	3.59	5.2	14	2	1	1	12	5072.87
46.04	NA	NA	72	72	68	NA	106	104	100	NA	114	16.7	101.8	4.45	3.4	14	2	1	2	3	4497.75
52.74	NA	NA	60	66	48	NA	106	102	104	NA	107	7.17	105.3	4.12	4.3	14	2	1	2	3	5330.61
50.8	NA	NA	NA	NA	62	NA	NA	NA	106	NA	86	11.16	102.6	4.38	3.7	14	2	1	1	10	11521.6
52.8	NA	NA	58	60	66	NA	116	100	102	NA	118	5.95	101.3	4.45	4.5	14	1	1	2	6	5083.52
55.04	NA	NA	64	66	64	NA	110	106	102	NA	111	9.75	103.8	4.43	4.9	14	2	1	2	3	5269.23
57	NA	NA	64	66	70	NA	104	110	104	NA	72	15.5	104.9	3.98	4.2	14	2	1	1	13	4868.85
51.7	NA	NA	60	56	58	NA	110	104	106	NA	66	10.68	99.8	4.28	5.1	14	1	1	1	6	9140.25
51.5	NA	NA	NA	NA	68	68	NA	NA	108	106	107	5.74	103.1	4.02	4.2	14	2	1	1	4	6827.89
56.6	NA	NA	60	62	66	NA	108	108	106	NA	104	7.25	101.5	3.62	4.2	14	2	1	1	3	7520.24
83.7	NA	NA	0	0	30	NA	110	104	108	NA	87	13.1	101.3	4.42	5.5	14	1	1	2	6	11351.5
44.6	NA	NA	74	70	74	NA	112	106	106	NA	70	9.67	103.6	4.07	4.4	14	1	1	1	5	12417.7
62.04	NA	NA	64	62	70	NA	114	108	102	NA	123	10.61	104.3	3.9	4.5	14	2	1	2	3	5269.23
74.64	NA	NA	68	66	70	NA	112	106	108	NA	105	7.91	105.4	4.2	5.4	14	1	1	1	3	5818.74
55.1	NA	NA	74	76	NA	78	110	108	NA	110	47	6.76	104.7	4.5	4.8	14	1	1	1	4	8226.25
78.4	NA	NA	68	58	62	NA	110	112	106	NA	85	9.63	103.1	4.12	6.3	14	1	1	2	8	11196.3
36.7	NA	NA	64	NA	62	NA	110	NA	110	NA	68	15.22	100.2	4.45	3.3	14	2	1	2	10	6564.57
47.1	NA	NA	0	NA	0	NA	112	NA	112	NA	97	8.81	102.4	4	3.1	14	2	1	2	10	6298.76
49.6	NA	NA	NA	78	70	68	NA	114	112	110	89	13.94	103.3	4.41	3.6	14	2	1	1	4	7729.99
48.8	NA	NA	76	78	76	NA	110	112	116	NA	82	10.72	105.7	3.95	3.2	14	2	1	2	13	4148.25
84.2	NA	NA	70	76	72	NA	114	114	110	NA	90	27.33	98.9	3.7	4.8	14	2	1	1	4	7010.13
47	NA	NA	64	64	70	NA	120	110	110	NA	89	12.46	104.7	4.74	5.1	14	1	1	2	2	6336.79
55.3	NA	NA	84	82	88	NA	118	112	112	NA	105	13.16	101.2	3.91	5.7	14	2	1	1	4	5968.24
58	NA	NA	58	60	60	NA	114	116	112	NA	95	19.41	101.3	4.29	3.7	14	2	1	1	3	7553.39
70.8	NA	NA	68	64	72	NA	118	114	114	NA	101	15.58	101.8	4.58	5.4	14	1	1	1	3	7817.37
75.2	NA	NA	70	66	84	NA	116	118	112	NA	93	19.63	102.1	3.98	5	14	2	1	1	12	6137.04
84.6	NA	NA	68	72	74	NA	114	114	118	NA	106	22.16	99.6	3.82	6.3	14	2	1	2	10	6373.61
58.4	NA	NA	74	70	72	NA	118	114	116	NA	110	9.06	101.2	3.95	6.6	14	1	1	2	6	5501.5
56.5	NA	NA	78	78	82	NA	120	116	114	NA	111	21.18	98	3.94	7	14	1	1	2	12	5283.12
54.1	NA	NA	NA	70	62	70	NA	116	114	122	70	10.13	103.1	4.14	5.9	14	1	1	1	12	6369.18
80.5	NA	NA	58	56	56	NA	118	118	116	NA	95	9.31	103.2	4.34	6.6	14	1	1	1	13	4511.97
94.5	NA	NA	68	64	66	NA	118	116	120	NA	90	25.71	101.4	4.15	7.7	14	1	1	1	2	15572.7
58.3	NA	NA	72	72	74	NA	122	120	120	NA	62	11.71	99.6	4.24	5.2	14	2	1	2	6	4553.17
89.7	NA	NA	54	50	NA	60	116	124	NA	128	94	15.99	102.3	3.62	5.6	14	2	1	1	12	6112.4
71.9	NA	NA	66	68	68	NA	128	120	122	NA	139	14.12	102.9	4.06	6.5	14	1	1	1	4	6783.78
101.8	NA	NA	64	70	NA	64	124	124	NA	122	114	28.63	106	4.24	4.7	14	2	1	1	12	7607.38
90.1	NA	NA	70	66	62	NA	124	124	124	NA	53	59.08	104.3	4.41	8.7	14	1	1	1	3	7259.03
79.5	NA	NA	76	64	60	NA	126	126	126	NA	100	17.33	101.9	4.58	5.3	14	1	1	2	2	8712.13
94.4	NA	NA	80	78	76	NA	134	128	118	NA	98	25.66	100.4	3.99	8.1	14	1	1	1	6	6910.73
95.2	NA	NA	60	50	60	NA	126	128	130	NA	101	40.32	104.6	4.33	4.7	14	2	1	1	3	8169.08
64	NA	NA	64	70	68	NA	96	98	98	NA	86	8	101.7	4.02	6.4	15	1	1	1	3	7460.17
51.8	NA	NA	52	52	NA	54	100	98	NA	98	94	11.83	101.3	4.27	3.7	15	2	1	2	10	6723.48
66.4	NA	NA	50	52	52	NA	102	98	98	NA	90	8.13	106.7	3.87	2.9	15	2	1	1	5	11561.8
53	NA	NA	48	NA	64	NA	102	NA	98	NA	68	8.73	102.4	4.62	3.2	15	2	1	1	12	7734.33
81.24	NA	NA	58	52	52	NA	102	102	96	NA	72	8.05	106.2	4.27	3.6	15	2	1	2	3	5226.88
47.5	NA	NA	50	56	44	NA	100	106	102	NA	84	7.73	100.2	3.91	4.8	15	2	1	2	2	5540.09
59.7	NA	NA	50	50	50	NA	100	106	104	NA	88	12.05	107	4.46	5.5	15	1	1	1	3	7624.83
44.54	NA	NA	68	70	72	NA	102	104	106	NA	90	8.19	101.2	3.99	2.3	15	2	1	2	3	6047.73
59.3	NA	NA	62	66	64	NA	108	102	104	NA	105	13.06	103	5.38	3.4	15	2	1	1	11	16120.8
52.4	NA	NA	NA	64	72	NA	NA	104	110	NA	88	5.13	100.9	4.19	3.5	15	1	1	1	12	5984.55
48.5	NA	NA	64	66	58	NA	106	108	108	NA	63	14.16	99.4	4.56	3.6	15	2	1	1	3	6701.14
83	NA	NA	66	70	64	NA	110	100	112	NA	84	17.39	101.5	4.14	4.6	15	2	1	1	4	6063.98
53	NA	NA	74	78	72	NA	106	112	106	NA	79	13.28	103.1	3.68	4.8	15	2	1	1	13	4173.07
61.74	NA	NA	72	72	70	NA	106	110	110	NA	122	12.83	102.8	3.98	4.3	15	2	1	2	3	4722.64
70.2	NA	NA	70	70	NA	72	112	108	NA	110	48	9.5	101.5	3.81	3	15	2	1	1	4	6671.05
47.4	NA	NA	58	66	62	NA	112	106	114	NA	89	12.44	103.7	3.89	3.2	15	2	1	1	13	4960.24
58.2	NA	NA	68	72	70	NA	110	112	114	NA	87	11.77	106.8	4.67	5.3	15	1	1	2	2	7142.71
61.7	NA	NA	56	70	NA	70	118	108	NA	110	83	7.84	103.1	4.35	7.2	15	1	1	1	4	7291.36
70.2	NA	NA	56	50	50	NA	110	114	112	NA	98	15.63	102.6	4.15	5.6	15	1	1	2	6	5048.25
114.44	NA	NA	68	68	66	NA	114	112	110	NA	132	35.06	104.5	3.96	6.1	15	2	1	2	3	7155.26
69.3	NA	NA	68	64	64	NA	110	114	116	NA	77	8.72	103.9	4.45	5	15	1	1	1	6	6359.9
100.1	NA	NA	NA	NA	30	NA	NA	NA	114	NA	96	19.56	106.4	4.48	5.8	15	1	1	1	12	5968.27
63.1	NA	NA	82	80	80	NA	110	116	118	NA	35	6.96	98.4	4.53	7	15	1	1	2	6	5802.77
104.6	NA	NA	56	64	NA	64	112	118	NA	114	113	38.77	102.7	4.54	5.8	15	1	1	1	4	6417.91
66.2	NA	NA	NA	56	NA	60	NA	116	NA	114	104	19.56	101.7	3.77	5.2	15	2	1	1	4	6251.14
58.1	NA	NA	58	68	70	NA	122	112	114	NA	101	12.05	107.2	4.41	3.5	15	2	1	2	2	7183.17
61.4	NA	NA	62	72	60	NA	122	118	114	NA	58	4.72	102.9	4.98	5.6	15	1	1	2	2	5372.21
70.8	NA	NA	68	66	64	NA	118	120	116	NA	139	9.61	102	4.12	5.8	15	1	1	2	3	7496.62
73.8	NA	NA	86	92	NA	86	118	116	NA	120	56	9.22	99.8	4.59	5.2	15	1	1	2	10	9537.06
66.3	NA	NA	58	54	50	NA	120	120	120	NA	71	15.37	103.3	4.02	5.5	15	1	1	2	13	8465.14
67.94	NA	NA	58	64	66	NA	120	124	124	NA	89	14.68	100.6	3.77	4.3	15	2	1	2	3	6874.37
92.5	NA	NA	NA	62	78	84	NA	128	126	126	86	12.37	104.7	4.05	5.7	15	1	1	1	4	7975.01
56.8	NA	NA	NA	NA	NA	NA	NA	NA	NA	NA	89	15.02	104	4.08	4.1	15	2	1	2	2	5855.64
61.1	2	NA	48	NA	NA	NA	80	NA	NA	NA	98	6.7	100.7	3.63	3.9	16	2	1	1	3	6781.72
71.14	2	NA	54	52	52	NA	92	86	92	NA	258	11.66	102.2	3.88	3.1	16	2	1	2	3	5567.16
47.6	2	NA	50	40	40	NA	92	92	90	NA	72	6.7	102.1	3.77	3.2	16	2	1	1	3	9384.17
38.9	2	NA	66	62	NA	68	94	96	NA	98	60	3.07	97	3.41	3.8	16	2	1	2	7	4850.06
62.74	2	NA	60	52	50	NA	98	100	94	NA	92	6.7	103.3	3.77	5	16	2	1	2	3	4648.9
69.3	2	NA	60	70	70	NA	100	98	100	NA	96	20.86	104.6	4.08	3.3	16	2	1	1	10	11230
60	2	NA	56	68	76	NA	98	100	102	NA	125	20.17	101.2	4.26	4.3	16	2	1	1	4	7321.92
46.8	2	NA	60	74	80	NA	104	96	104	NA	89	9.61	103.5	4.36	6.9	16	2	1	1	3	6985.33
55.7	2	NA	62	64	54	NA	108	102	102	NA	89	14.29	100.9	3.95	4.3	16	2	1	1	4	6303.66
82.3	2	NA	60	60	64	NA	104	102	106	NA	77	18.08	101.2	4.1	6.4	16	1	1	1	3	8678.83
63.64	2	NA	50	54	52	NA	110	102	102	NA	81	4.01	102.8	4.56	5.8	16	1	1	2	3	6495.75
64.4	NA	NA	NA	40	34	NA	NA	104	106	NA	75	11.53	104.3	4.06	7.1	16	1	1	2	2	5132.6
46.64	2	NA	76	74	72	NA	104	108	104	NA	77	3.99	103.6	4.05	4.3	16	2	1	2	3	5743.92
54.34	2	NA	74	66	72	NA	102	108	106	NA	129	8.39	101	4.08	3.9	16	2	1	2	3	7077.34
76.2	2	NA	52	48	54	NA	106	106	104	NA	75	6.3	101.6	4.2	5.6	16	1	1	1	4	7214.53
63.6	2	NA	NA	54	46	50	NA	104	106	108	81	4.98	98.1	4.05	5.6	16	1	1	1	10	5520.93
59.1	2	NA	66	78	68	NA	110	106	104	NA	88	15.89	100.8	4.05	4.1	16	2	1	1	4	7321.92
49.4	2	NA	64	68	72	NA	116	104	104	NA	88	11.13	100.6	4.1	4.6	16	2	1	2	10	7762.25
57.9	2	NA	40	50	50	NA	106	110	110	NA	78	10.05	102.1	4.29	3.7	16	2	1	1	4	7173.81
51.4	2	NA	74	84	82	NA	108	106	114	NA	96	10.18	99.7	4.1	4.2	16	2	1	1	13	6280.59
73.4	NA	NA	70	68	70	NA	110	108	110	NA	59	13.78	100.7	3.81	3.7	16	2	1	2	8	17106.8
86.2	2	NA	66	68	70	NA	114	110	106	NA	68	14.48	105.5	4.14	4.8	16	1	1	1	13	5839.08
56.9	2	NA	58	58	52	NA	110	112	114	NA	111	13.06	101.5	4.41	6.6	16	1	1	2	13	4094.69
66.94	2	NA	62	56	58	NA	110	112	116	NA	91	4.97	102.6	3.91	5.8	16	1	1	2	3	6615.16
48.8	2	NA	56	60	64	NA	116	112	112	NA	113	10.24	100.8	4.03	3.6	16	2	1	2	13	6821.96
61.8	2	NA	64	66	76	NA	106	116	118	NA	117	13.04	102.3	4.01	4.1	16	2	1	1	6	9088.06
63	2	NA	80	86	80	NA	114	116	114	NA	73	10.79	100.6	4.45	6	16	1	1	2	6	5114.17
56.7	2	NA	58	54	54	NA	112	120	114	NA	65	8.1	103.3	4.17	5.3	16	1	1	2	6	5866.38
56.7	NA	NA	54	46	60	NA	116	114	116	NA	87	7.85	105	4.14	6.4	16	1	1	1	12	5852.85
57.6	2	NA	68	70	72	NA	116	112	118	NA	93	7.3	99.5	4.23	4.4	16	1	1	2	6	6347.36
82.3	2	NA	56	68	62	NA	118	116	112	NA	88	8.36	107.1	4.62	2.9	16	2	1	1	12	5791.42
94.3	2	NA	76	72	76	NA	116	114	116	NA	109	25.81	99.5	4.28	7.5	16	1	1	1	12	7543.02
62.1	2	NA	42	38	46	NA	120	116	112	NA	71	9.13	101.4	3.82	5.6	16	1	1	1	3	7606.7
62.3	2	NA	36	48	NA	42	122	114	NA	112	93	10.91	99.9	4	5.6	16	1	1	1	5	13672.1
71.4	2	NA	56	54	66	NA	118	120	116	NA	101	14.16	106.8	4.06	4.8	16	1	1	1	12	8164.1
64.1	2	NA	48	52	52	NA	116	118	122	NA	124	11.11	101.7	4.18	5.6	16	1	1	2	2	5587.03
94.44	2	NA	72	72	68	NA	122	118	116	NA	110	64.34	102.5	4.47	7.2	16	1	1	2	3	6003.53
61.2	2	NA	70	78	74	NA	120	122	116	NA	103	8.52	104.9	4.23	5	16	1	1	1	12	14383.4
67.3	2	NA	58	60	60	NA	118	124	120	NA	164	15.35	98.8	4.18	7.3	16	1	1	2	6	5866.38
62.2	2	NA	70	68	66	NA	124	122	118	NA	126	13.31	102	3.55	3.2	16	2	1	1	6	7196.99
107	2	NA	66	74	72	NA	124	122	122	NA	116	23.37	100.1	3.96	7.1	16	1	1	2	6	12749.5
61.8	2	NA	70	66	68	NA	126	122	122	NA	71	6.06	104.4	4.27	4.9	16	1	1	2	13	4948.68
90.3	2	NA	58	NA	NA	NA	124	NA	NA	NA	153	75.13	102.7	4.06	4.5	16	2	1	2	10	9229.01
79.4	2	NA	60	58	NA	54	130	122	NA	122	80	9.61	105.2	4.09	2.7	16	2	1	1	12	6714.55
135.4	2	NA	80	80	88	NA	126	130	124	NA	85	59.39	101.1	4.32	7.1	16	1	1	2	6	4832.97
58.1	2	NA	60	66	NA	78	122	128	NA	132	85	13.7	104	4.21	5.1	16	1	1	1	4	7280
78.8	2	NA	72	72	68	NA	132	126	126	NA	124	15.88	99.1	3.85	5.3	16	1	1	1	12	7541.82
57.9	2	NA	84	88	82	NA	134	128	132	NA	72	11.29	101	4.48	4.2	16	1	1	1	4	7229.12
77.6	2	NA	74	78	78	NA	132	138	124	NA	127	22.5	105	4.24	5.4	16	2	1	1	12	6353.01
53.4	2	NA	NA	NA	NA	NA	NA	NA	NA	NA	96	13.73	101	4.15	4.6	16	2	1	1	5	6838.47
84.1	1	2	64	34	NA	56	128	124	NA	124	98	6.37	100.6	4.54	5.8	16	1	1	1	12	13719.3
48.9	2	NA	50	50	50	NA	90	90	92	NA	121	7.61	104.8	4.15	3	17	2	1	1	3	4430.77
44.4	2	NA	62	68	60	NA	90	94	90	NA	67	18.88	101.5	4.17	4.1	17	2	1	1	3	8020.77
71.04	2	NA	72	68	72	NA	94	102	100	NA	133	9.33	103.1	4.4	4.8	17	1	1	2	3	6074.18
50.1	2	NA	58	52	NA	64	98	96	NA	104	86	6.51	105	4.09	4.2	17	2	1	1	10	10641.4
53.74	NA	NA	66	62	68	NA	108	102	90	NA	110	3.8	104	4.42	4	17	2	1	2	3	4849.24
79.9	2	NA	NA	70	NA	NA	NA	100	NA	NA	93	17.81	106.6	4.23	7.4	17	1	1	1	10	6422.51
63.64	2	NA	62	64	66	NA	98	102	106	NA	88	6.33	99.2	4.36	5.6	17	1	1	2	3	5512.63
75.8	NA	NA	60	60	60	NA	100	102	104	NA	124	19.2	103.6	4.27	5.1	17	2	1	1	3	7802.27
53.34	2	NA	58	58	64	NA	102	102	104	NA	51	7.13	102.5	3.96	5.4	17	1	1	2	3	5287.74
79.6	2	NA	68	NA	72	NA	108	NA	100	NA	101	9.6	103.3	4.37	5.6	17	2	1	2	2	10598.4
69.2	2	NA	52	46	NA	50	106	102	NA	106	96	11.32	105.3	4.88	5.1	17	1	1	1	12	7929.48
51.1	2	NA	58	58	56	NA	106	108	102	NA	73	16.96	105.3	4.21	3.3	17	2	1	2	13	5682.13
79.04	2	NA	68	NA	74	74	104	NA	106	106	93	35.13	104.1	4.07	4.5	17	2	1	2	3	5771.83
46.7	2	NA	58	66	64	NA	118	100	102	NA	107	10.93	102.1	3.92	5.5	17	2	1	1	3	6918.05
71.5	2	NA	50	50	52	NA	106	104	110	NA	90	11.42	99.8	4.33	6.6	17	1	1	2	13	6242.26
62.5	2	NA	80	78	80	NA	114	110	100	NA	61	10.47	101.5	3.74	4.6	17	1	1	1	4	7592.57
58.7	2	NA	60	60	58	NA	106	110	110	NA	100	11.99	100.6	3.48	4	17	2	1	1	3	6763.9
60.3	NA	NA	60	40	NA	48	108	114	NA	104	157	7.57	99.5	4.26	6	17	2	1	1	4	6671.05
87.6	2	NA	58	66	54	NA	112	108	108	NA	73	14.76	105.8	4.14	7.5	17	1	1	1	6	7941.07
55.7	2	NA	60	66	NA	66	112	110	NA	110	72	9.13	104.9	4.1	4.3	17	2	1	2	2	12725.3
65	2	NA	80	76	74	NA	108	116	110	NA	89	7.36	101.4	4.83	6.7	17	1	1	2	8	11256.1
65	2	NA	60	64	70	NA	110	114	114	NA	69	27.82	100.1	3.24	7	17	1	1	1	3	7155.83
75.8	2	NA	NA	46	68	72	NA	114	116	114	67	6.29	102.4	3.98	5.3	17	1	1	1	4	7229.12
83.6	2	NA	70	74	72	NA	114	116	114	NA	53	10.38	102.1	4.05	5	17	2	1	1	6	8245.89
84.5	2	NA	80	78	78	NA	116	114	114	NA	109	17.62	101.3	4.07	6.3	17	1	1	1	10	7988.38
50.2	2	NA	84	86	84	NA	114	116	116	NA	70	9.58	105.5	3.98	4.1	17	2	1	2	6	5180.94
50.6	2	NA	NA	70	70	74	NA	114	118	114	84	17.04	106	4.07	5.2	17	2	1	1	13	5036.08
65.4	2	NA	70	70	70	NA	116	114	116	NA	84	11.03	105.8	4.49	5.9	17	1	1	1	3	8117.25
70.3	2	NA	68	66	68	NA	116	116	114	NA	111	12.19	102	3.8	4	17	2	1	1	6	7402.04
56.1	2	NA	78	74	72	NA	118	116	114	NA	55	9.65	105.7	4.12	5.4	17	1	1	1	12	6587.25
68.34	2	NA	54	62	64	NA	114	116	118	NA	65	5.32	103.4	3.98	4.9	17	2	1	2	3	5567.16
75.4	2	NA	62	50	56	NA	118	120	110	NA	51	13.02	102.2	4.57	5	17	1	1	2	2	7216.05
80.5	2	NA	64	58	68	NA	118	116	120	NA	73	10.88	102.1	4.1	5.1	17	1	1	1	4	7229.12
60.1	2	NA	58	66	64	NA	122	122	116	NA	83	10.12	103.6	4.23	4.4	17	2	1	1	4	6831.24
69.2	NA	NA	66	62	NA	64	130	122	NA	112	59	7.57	102.6	3.84	6.6	17	1	1	1	10	6068.36
58.3	2	NA	74	62	70	NA	118	124	124	NA	92	10.12	101.4	3.9	6.1	17	1	1	1	4	7571.75
84.5	2	NA	70	70	68	NA	122	122	122	NA	126	19.73	104.6	4.21	5.2	17	1	1	1	3	7696.22
61.9	2	NA	0	0	NA	38	124	122	NA	124	66	7.36	101.3	3.92	5.5	17	1	1	1	10	5759.09
67.3	9	NA	56	NA	44	44	122	NA	126	122	125	9.16	101	3.9	4.8	17	1	1	1	12	6380.71
75.6	2	NA	48	54	66	NA	130	132	120	NA	157	20.67	103.4	4.04	5.7	17	1	1	2	6	6191.17
89.34	NA	NA	88	68	82	NA	130	128	126	NA	61	24.02	101.1	4.54	5	17	1	1	2	3	6723.01
77.24	2	NA	78	86	90	NA	134	130	130	NA	81	12.01	103.7	4.6	6.1	17	1	1	2	3	5925.22
77.5	2	NA	74	76	74	NA	134	130	132	NA	99	10.45	103.5	3.79	5.9	17	1	1	1	6	7072.09
154.8	2	NA	NA	104	80	102	NA	140	148	150	137	79.72	103.5	4.09	7.4	17	1	1	1	6	6652.03
80.3	2	NA	54	58	60	NA	84	88	94	NA	91	14.38	103.2	3.79	5.7	18	1	1	1	3	9128.04
52.14	2	NA	48	50	52	NA	94	96	88	NA	106	12.71	104.6	4.7	3.4	18	2	1	2	12	6108.97
56.3	NA	NA	62	66	58	NA	100	90	90	NA	77	13.05	105.2	3.75	5	18	1	1	2	13	5446.56
63.7	2	NA	60	60	54	NA	96	102	90	NA	101	20.14	103.4	3.66	5.7	18	2	1	2	6	4317.81
54.5	2	NA	48	58	56	NA	100	100	90	NA	79	5.69	100.7	3.96	5.2	18	1	1	1	4	7282.54
68.5	2	NA	64	58	64	NA	98	96	98	NA	84	16.3	105.1	3.84	4.4	18	2	1	2	13	4702.36
54.3	2	NA	56	54	54	NA	102	100	96	NA	107	10.64	101.5	3.75	3.2	18	2	1	1	13	5145.28
51.2	NA	NA	60	40	48	NA	106	100	94	NA	65	5.24	103.9	4.5	4.9	18	1	1	2	11	13207.4
51	2	NA	64	60	52	NA	98	100	106	NA	80	9.87	100.5	4.36	2.7	18	2	1	1	4	12417.5
63.1	2	NA	58	68	58	NA	104	102	98	NA	89	10.54	102.6	3.9	2.5	18	2	1	1	4	7797.97
58.3	2	NA	60	68	64	NA	102	104	102	NA	193	6.64	106.5	4.13	4.9	18	2	1	1	5	12375.2
61.4	2	NA	58	60	NA	66	102	104	NA	102	75	14.65	106.2	3.93	3.3	18	2	1	1	12	5862.49
48.4	2	NA	58	56	56	NA	106	102	106	NA	110	9.98	101	3.68	4.6	18	2	1	1	13	6035
78.1	2	NA	72	74	70	NA	108	106	100	NA	110	12.37	99.9	4.08	5.3	18	1	1	2	6	6221.12
56.3	2	NA	NA	66	NA	66	NA	106	NA	104	108	7.29	100	4.25	7.1	18	1	1	1	4	7571.75
62.6	2	NA	66	NA	72	76	110	NA	102	104	45	10.6	104	3.86	3.7	18	2	1	2	2	6678.34
64.3	2	NA	56	56	58	NA	110	104	104	NA	121	9.06	102.3	3.77	3.6	18	2	1	1	3	7507.34
70.9	2	NA	60	56	52	NA	108	108	106	NA	102	18.7	106	4.01	4.4	18	2	1	1	3	10159.1
55.8	2	NA	66	NA	NA	NA	108	NA	NA	NA	98	8.51	100.7	3.84	4.2	18	2	1	1	4	6497.28
57.1	2	NA	68	74	80	NA	108	108	110	NA	83	15.6	102.2	4.25	3	18	2	1	1	13	4828
70.4	2	NA	60	56	60	NA	118	118	96	NA	87	16.01	105.9	4.44	3.4	18	2	1	2	13	5204.52
54.4	2	NA	62	62	68	NA	108	112	114	NA	107	7.36	97.6	4.68	7.5	18	1	1	2	6	6347.36
63.34	2	NA	74	70	58	NA	110	116	108	NA	114	12.81	101.2	3.75	6.4	18	1	1	2	3	7828.23
56.5	2	NA	68	70	72	NA	110	114	112	NA	94	6.5	101.7	4.45	5.8	18	1	1	1	4	7855.11
67.74	2	NA	56	60	64	NA	116	110	110	NA	92	7.55	101.3	3.8	3.3	18	2	1	2	3	4881.35
42.6	2	NA	54	56	54	NA	112	114	112	NA	66	8.13	106.5	4.46	3.1	18	2	1	2	2	6023.75
56.4	2	NA	64	54	60	NA	112	110	116	NA	62	15.08	101.4	4.04	3.4	18	2	1	1	12	6397.18
70.4	2	NA	62	72	70	NA	116	112	110	NA	102	10.94	103	4.37	5.9	18	1	1	2	2	7299.96
75.6	2	NA	66	68	64	NA	110	116	112	NA	77	8.97	102.2	4.04	2.5	18	2	1	1	13	4461.3
76.8	2	NA	NA	50	48	NA	NA	112	114	NA	107	15.75	99.6	3.75	4.4	18	1	1	1	4	8892.33
66.9	2	NA	56	62	58	NA	116	116	110	NA	95	14.74	100.2	3.9	2.8	18	2	1	2	12	5548.11
92.2	2	NA	76	NA	NA	72	112	NA	NA	116	124	14.12	102.8	4.16	7.5	18	1	1	2	5	11764.4
116.2	NA	NA	68	78	70	NA	118	110	114	NA	106	23.68	108.5	4.13	7.4	18	1	1	1	4	6808.34
91.4	2	NA	78	74	76	NA	114	114	118	NA	83	14.99	99.8	3.72	8.6	18	1	1	1	4	7571.75
110.2	2	NA	56	60	56	NA	118	114	114	NA	60	9.18	102.7	3.89	7.1	18	1	1	1	3	8533.27
48.4	2	NA	68	74	70	NA	114	120	116	NA	77	10.07	99.4	4.15	4	18	2	1	2	6	5272.81
68	2	NA	58	62	NA	78	120	116	NA	114	66	5.18	101.3	3.75	5.3	18	1	1	1	4	7229.12
96.4	2	NA	60	60	48	NA	118	118	114	NA	119	21.46	105.6	4.03	5.3	18	2	1	1	12	6714.55
51.2	2	NA	72	70	70	NA	118	116	118	NA	67	8.09	99.3	4.39	5.9	18	1	1	1	3	8533.27
70.5	2	NA	52	NA	58	60	118	NA	112	122	75	13.08	104.7	3.63	3.8	18	2	1	1	4	7351.61
55.5	2	NA	36	NA	NA	44	124	NA	NA	114	107	16.37	102	3.97	4.8	18	1	1	1	10	5708.13
73.1	2	NA	66	70	68	NA	120	120	118	NA	86	13.7	105.5	4.05	3.9	18	2	1	1	13	4779.97
78.9	2	NA	58	NA	34	NA	122	NA	118	NA	113	11.85	104.3	4.03	6.2	18	1	1	1	12	7641.49
112.9	2	NA	84	80	76	NA	126	122	116	NA	103	14.61	97.9	3.78	7.9	18	1	1	2	3	8402.49
110.34	2	NA	76	74	64	NA	126	118	124	NA	113	13.46	103.7	4.43	7.1	18	1	1	2	3	4945.95
55	2	NA	36	46	58	NA	128	122	124	NA	101	6.06	100.4	4.18	6.4	18	1	1	1	3	7372.61
71.6	2	NA	66	72	78	NA	124	126	124	NA	79	13.67	99.4	3.57	6.7	18	1	1	1	3	8581.34
67.9	2	NA	52	76	80	NA	124	126	126	NA	80	9.68	102	4.04	7.9	18	1	1	2	2	6208.42
50.5	2	NA	46	46	44	NA	126	128	128	NA	65	9.12	101.4	4.09	4.4	18	2	1	1	10	5189.35
107.5	2	NA	74	76	80	NA	130	134	132	NA	194	34.65	100.5	3.84	6.4	18	2	1	1	6	8543
65.2	1	2	58	NA	54	66	112	NA	108	112	97	10.11	103.5	3.91	4.1	18	2	1	1	4	13476.5
87.1	1	2	68	NA	NA	64	114	NA	NA	110	81	16.27	101.8	3.78	5.7	18	1	1	1	4	8113.13
67.5	1	2	NA	NA	74	70	NA	NA	112	116	141	73.89	103.8	4.25	5.9	18	2	1	2	5	4699.88
42.8	2	NA	66	64	68	NA	94	96	92	NA	91	11.13	100.4	4.2	3.2	19	2	1	1	12	6556.64
56.4	2	NA	70	70	72	NA	94	98	94	NA	89	16.53	106	4.53	4.1	19	2	1	1	13	4483.4
65.3	2	NA	60	60	60	NA	94	96	98	NA	70	9.24	102	4.75	4.5	19	1	1	1	3	7972.2
67.5	NA	NA	70	74	74	NA	98	94	98	NA	111	9.89	102.9	3.84	5.2	19	2	1	1	3	7335.52
52.5	2	NA	50	NA	64	64	100	NA	96	96	141	12.39	100.8	3.67	3.3	19	2	1	2	7	4569.46
66.8	2	NA	52	66	70	NA	98	96	98	NA	70	16.98	103.3	3.78	1.9	19	2	1	1	4	8001.97
62.54	2	NA	72	72	70	NA	94	98	102	NA	85	11.7	105.2	4.12	3	19	2	1	1	3	5092.54
42	2	NA	68	72	70	NA	104	102	98	NA	67	6.43	102.9	4.19	4.7	19	2	1	1	4	12199.3
69.8	2	NA	36	38	44	NA	102	100	104	NA	54	22.39	99.6	4.28	6.4	19	1	1	2	13	6536.95
44.6	2	NA	62	60	68	NA	104	102	102	NA	81	12.22	104.7	4.36	3.5	19	2	1	1	13	4434.84
56.4	2	NA	50	56	NA	66	106	102	NA	100	135	7.2	101.5	4.1	6.6	19	1	1	1	7	10883.4
53.8	2	NA	60	66	64	NA	104	100	106	NA	117	10.31	102.7	3.98	3.7	19	2	1	1	13	4565.36
53.3	2	NA	62	NA	42	48	102	NA	102	108	98	10.42	102.1	3.62	3.7	19	2	1	2	7	4560.97
62.24	2	NA	76	78	70	NA	104	104	104	NA	92	9.74	102.3	4.11	4.8	19	1	1	2	3	6121.25
83.6	2	NA	64	72	NA	68	108	106	NA	102	132	20.84	101.2	4.13	6.4	19	2	1	1	4	12798.4
98.5	2	NA	72	70	68	NA	106	106	104	NA	103	32.27	101	4.43	6.3	19	1	1	2	6	5409.67
80.6	2	NA	60	NA	NA	60	108	NA	NA	104	91	14.77	104.3	4.26	4.1	19	2	1	2	4	8008.72
48.1	2	NA	64	68	66	NA	108	110	108	NA	52	20.49	103.8	3.78	5.2	19	1	1	1	6	6249.76
64.2	2	NA	66	56	64	NA	112	106	108	NA	147	7.95	103.5	4.07	3.1	19	2	1	2	2	5629.33
48.4	2	NA	66	64	70	NA	106	112	110	NA	83	15.4	100.8	4.36	4.3	19	2	1	1	3	8020.77
53.1	2	NA	70	74	66	NA	110	108	112	NA	83	10.98	102.7	4.15	3.7	19	2	1	1	3	6633.14
63.3	2	NA	76	68	78	NA	104	110	116	NA	86	25.05	103.8	4.18	3.9	19	2	1	1	3	8001.97
70.7	2	NA	54	58	60	NA	110	108	112	NA	71	9.45	104.5	4.47	8.9	19	1	1	2	2	6983.18
54.2	2	NA	64	70	70	NA	110	110	112	NA	78	5.73	108.2	4.06	4.3	19	2	1	1	4	7676.68
51.8	2	NA	80	84	78	NA	118	108	108	NA	108	5.95	99.6	4.31	6.6	19	2	1	1	4	6333.7
60.1	2	NA	68	NA	NA	72	108	NA	NA	116	127	4.8	101.5	3.95	6.5	19	1	1	1	10	11416.3
65.7	2	NA	62	64	58	NA	112	114	110	NA	160	6.44	100.7	4.04	5.5	19	1	1	1	10	6572.09
66.2	2	NA	80	58	58	NA	108	120	108	NA	95	30.31	103.8	4.14	4.4	19	2	1	1	13	5021.81
58.14	2	NA	70	64	70	NA	116	110	112	NA	72	10.33	102.1	3.81	6.2	19	1	1	2	3	5319.8
69.6	2	NA	90	84	78	NA	112	114	114	NA	40	24.13	99.6	3.73	4.4	19	2	1	2	10	5914.09
84.2	2	NA	68	68	84	NA	116	114	110	NA	133	16.95	109.2	4.11	5.9	19	2	1	1	12	6356.89
57.6	2	NA	72	72	NA	84	112	118	NA	114	142	11.68	101.5	3.92	5.2	19	2	1	1	4	7207.67
62.1	2	NA	46	40	38	NA	116	112	116	NA	63	6.98	99.2	3.64	7.4	19	1	1	1	3	7077.41
57.7	2	NA	88	78	82	NA	118	112	118	NA	78	7.25	98.5	4.76	4.3	19	1	1	1	10	7165.74
122.64	2	NA	74	82	74	NA	116	120	112	NA	139	21.08	101.4	4.46	6.4	19	1	1	2	3	5858.66
53.6	2	NA	60	70	68	NA	118	118	116	NA	123	9.16	101.1	3.96	4.8	19	2	1	1	6	9088.06
76	2	NA	56	58	60	NA	116	118	118	NA	123	6.52	103.4	4.53	6.1	19	1	1	1	10	5715.5
54.6	2	NA	58	54	74	NA	118	122	122	NA	88	6.73	99	4.12	5.9	19	1	1	2	7	4852.4
59.9	2	NA	76	76	76	NA	122	120	120	NA	129	26.48	109.8	3.93	4.2	19	2	1	1	13	5140.15
68.6	2	NA	58	62	56	NA	124	120	120	NA	47	9.46	103.6	3.81	7.2	19	1	1	1	7	9975.67
62.3	NA	NA	46	34	NA	38	124	126	NA	122	97	4.69	101.3	4.32	5.7	19	1	1	2	10	7373.32
82.24	2	NA	64	70	74	NA	124	124	124	NA	69	9.62	105	4.04	3.9	19	2	1	2	3	4881.35
92.34	2	NA	66	70	68	NA	130	132	134	NA	137	27.21	102.1	4.04	6.5	19	2	1	2	3	5401.74
93.8	2	NA	76	64	62	NA	134	132	134	NA	75	29.67	107.2	4.29	4.3	19	1	1	2	6	11370.2
57	2	NA	NA	NA	NA	NA	NA	NA	NA	NA	175	7.3	106	4.36	6.3	19	2	1	2	2	5437.32
74.3	1	2	54	52	58	NA	118	118	120	NA	78	18.79	104.7	4.24	4.3	19	2	1	2	10	13729.4
68.8	1	2	74	68	64	NA	142	142	140	NA	70	31.72	105.6	3.87	4.9	19	2	1	1	13	4341.15
63.1	NA	NA	NA	NA	68	66	NA	NA	100	102	113	24.18	99.9	4.21	7.9	20	1	1	1	12	44148.3
56.2	NA	NA	68	70	68	NA	102	104	100	NA	85	10.17	101.8	3.75	4.8	20	2	1	2	6	43305.1
89.6	2	NA	46	NA	60	NA	110	NA	106	NA	103	12.27	101.1	4.31	4	20	2	1	1	5	5965.94
55.5	2	NA	50	54	64	NA	112	108	114	NA	110	8.04	104.4	3.95	4.5	20	2	1	1	6	47966
61.34	2	NA	66	60	54	NA	114	112	110	NA	117	4.12	99.4	4.1	6.5	20	1	1	2	3	45076.6
65	2	NA	34	40	38	NA	112	116	112	NA	191	14.98	103	3.99	5.4	20	2	1	2	10	4280.15
104.8	2	NA	60	60	60	NA	120	114	116	NA	95	47.49	105.6	4.27	6.6	20	2	1	1	3	53129.3
65.5	2	NA	60	62	56	NA	118	116	124	NA	106	20.56	103.8	4.11	3.5	20	2	1	2	6	46476.2
82.1	2	NA	66	NA	NA	76	120	NA	NA	122	129	20.65	107.1	4.28	4.7	20	2	1	1	4	52797.6
62.8	2	NA	68	60	56	NA	92	92	92	NA	88	9.72	104.3	4.06	5.6	21	1	1	1	5	36893.5
68.4	2	NA	52	52	48	NA	96	92	90	NA	129	5.91	101.7	4.22	5.6	21	1	1	2	8	45777.8
48.94	2	NA	66	64	62	NA	94	92	96	NA	101	8.72	101.5	3.77	3.3	21	2	1	2	3	5730.36
96.84	2	NA	74	NA	72	80	94	NA	108	108	155	17.75	105.9	4.41	5.4	21	2	1	2	3	4347.53
78.7	2	NA	52	58	64	NA	108	106	106	NA	177	13.33	106	3.84	3.2	21	2	1	2	13	32295.9
52	NA	NA	48	40	42	NA	108	108	112	NA	152	7.92	100.3	4.3	4.8	21	1	1	2	2	37863.4
69	2	NA	72	64	76	NA	112	112	106	NA	105	6.76	99.2	4.5	4.9	21	1	1	2	6	50824.7
75.1	2	NA	64	64	60	NA	112	114	106	NA	154	16.02	103	3.99	3.9	21	2	1	1	13	3851.2
87.3	2	NA	NA	82	80	84	NA	112	110	112	84	9.6	99.6	4.04	5.3	21	1	1	1	4	67269.5
54.5	2	NA	66	66	NA	58	116	116	NA	120	62	38.75	103.4	3.89	4.3	21	2	1	2	2	4281.61
124.2	2	NA	74	76	80	NA	118	122	124	NA	86	30.21	102.3	4.07	7.6	21	1	1	1	4	67269.5
96.2	2	NA	62	NA	66	82	124	NA	122	120	132	20.64	101.5	4.26	7.8	21	1	1	1	6	48080.7
48.5	2	NA	80	78	82	NA	124	122	128	NA	138	7.41	99.9	3.58	4.3	21	2	1	1	5	46691.3
101	1	2	64	70	60	NA	110	112	114	NA	104	6.86	100.2	4.48	6.7	21	1	1	1	10	63704.6
66.7	2	NA	52	42	NA	54	94	98	NA	92	162	4.92	103.5	3.81	3.2	22	2	1	1	10	8137.19
44.6	2	NA	56	62	60	NA	94	98	98	NA	45	5.53	100.1	3.68	2.7	22	2	1	2	12	4983.62
53.6	NA	NA	66	NA	62	60	112	NA	106	108	124	17.02	99	4.2	4.7	22	1	1	1	10	41450
91.2	2	NA	60	56	58	NA	108	110	112	NA	104	17.25	105.1	3.87	2.9	22	2	1	1	3	6934.58
65.2	2	NA	76	74	76	NA	110	118	106	NA	121	5.86	100.4	3.96	6.8	22	1	1	2	6	50824.7
55.4	2	NA	48	48	40	NA	116	118	112	NA	77	8.72	99.4	3.82	8.4	22	1	1	2	8	45777.8
97.5	2	NA	78	78	80	NA	120	120	124	NA	138	7.95	104	4.49	6.3	22	1	1	1	3	71666.6
62.2	NA	NA	80	80	72	NA	126	122	118	NA	85	6.59	104.7	4.7	6.5	22	1	1	1	13	47600.3
94.1	2	NA	70	74	76	NA	134	128	128	NA	139	23.98	105.4	4.05	3.8	22	2	1	1	13	36639.8
51.8	2	NA	54	NA	62	60	94	NA	96	94	83	4.1	99.3	3.73	3.6	23	2	1	1	4	61035.3
91.8	2	NA	60	56	56	NA	102	94	94	NA	118	15.43	102.8	3.79	4.7	23	2	1	1	10	64578.5
73	2	NA	58	56	56	NA	102	102	102	NA	115	19.6	101.7	3.98	2.9	23	2	1	1	6	5852.62
59.8	2	NA	56	58	62	NA	102	102	104	NA	79	7.84	103.3	4.07	2.7	23	2	1	2	2	46476.2
47.7	2	NA	50	48	48	NA	104	108	108	NA	46	7.57	101.1	4.21	3.9	23	2	1	1	6	12586.8
65.54	2	NA	74	68	66	NA	102	112	110	NA	77	5.05	107.6	3.97	4.4	23	2	1	2	3	42750.7
87.8	2	NA	58	58	64	NA	108	108	110	NA	206	22.25	106.9	4.21	4	23	2	1	1	13	3864.11
60.5	2	NA	56	56	58	NA	112	110	106	NA	134	10.09	106.9	3.56	3.9	23	2	1	1	13	3258.11
70.4	2	NA	78	82	76	NA	110	108	110	NA	80	7.02	105.4	3.96	3.5	23	2	1	1	10	39038.8
71	2	NA	72	80	76	NA	110	110	110	NA	77	6.32	102.8	3.65	4.8	23	2	1	1	4	61035.3
70.1	2	NA	72	74	74	NA	114	110	116	NA	101	20.72	100.3	4.18	4	23	2	1	2	6	45216.8
82.6	2	NA	64	52	52	NA	112	116	114	NA	98	17.49	101.8	4.01	4.1	23	2	1	1	10	7064.64
85	2	NA	60	NA	64	82	118	NA	126	120	145	18.35	101.9	4.05	7.4	23	1	1	1	4	45630.5
94.2	2	NA	64	NA	54	60	124	NA	136	124	137	9.34	103.8	4.14	7.2	23	1	1	1	10	48909.1
80.9	1	2	62	NA	NA	78	118	NA	NA	122	124	12.23	101.9	3.71	5.6	23	1	1	2	7	28668.8
75.4	2	NA	58	58	66	NA	94	94	98	NA	113	16.5	106.2	4.07	3.5	24	2	1	2	13	34205.9
57.9	2	NA	NA	60	54	60	NA	96	102	92	142	12.94	104.7	4.1	3.4	24	2	1	1	4	11676.9
63.8	2	NA	68	70	74	NA	106	100	104	NA	125	11.12	104.3	4	5	24	2	1	2	6	47760
65.6	2	NA	58	60	60	NA	106	108	108	NA	102	5.33	102.1	3.94	2.8	24	2	1	2	6	4009.35
113.9	2	NA	76	76	72	NA	108	108	110	NA	96	20.63	103.7	3.78	4.3	24	2	1	2	6	3805.08
70.6	2	NA	80	74	78	NA	112	112	110	NA	119	17.75	104.3	4.01	2.7	24	2	1	1	3	58984.3
75.5	2	NA	68	74	72	NA	114	114	106	NA	91	9.6	98.1	3.87	5.1	24	1	1	2	6	52638.3
93.2	2	NA	66	64	60	NA	114	110	110	NA	170	8.23	101.4	3.97	6.5	24	2	1	2	6	4390.59
93.8	2	NA	78	74	76	NA	114	114	116	NA	171	8.45	100.3	4.26	6.8	24	1	1	1	3	71666.6
129.7	2	NA	92	92	88	NA	132	136	134	NA	92	27.7	105.7	4.62	5.7	24	2	1	1	6	11118.2
54.7	2	NA	64	58	60	NA	106	100	104	NA	83	9.18	100.6	3.57	3.6	25	2	1	1	4	51859.1
74.9	2	NA	62	66	70	NA	114	112	118	NA	135	16.11	104.3	3.72	4.9	25	2	1	1	4	51859.1
67.8	2	NA	58	NA	NA	NA	118	NA	NA	NA	125	6.41	102.2	3.85	9.1	25	1	1	2	7	35796.3
65.1	2	NA	80	80	78	NA	128	128	128	NA	38	11.31	107	3.87	5.3	25	1	1	3	1	37435.4
70.1	2	NA	76	70	NA	68	128	128	NA	130	141	11.95	96.7	4.3	5.8	25	1	1	1	12	47080.2
63.44	2	NA	68	64	66	NA	96	100	94	NA	89	10.21	105.6	4.3	3.1	26	2	1	2	3	49514.1
60.5	2	NA	70	64	68	NA	104	100	100	NA	92	12.71	101.7	3.33	5.6	26	1	1	2	8	45777.8
65.34	2	NA	70	70	70	NA	104	102	98	NA	119	6.72	100.9	4.17	4.7	26	1	1	2	3	45004.4
64.7	2	NA	68	66	62	NA	102	102	102	NA	63	8.71	102.4	4.38	4	26	1	1	1	2	48987.1
56.9	2	NA	NA	54	52	54	NA	104	104	100	115	8.05	103.9	4.04	3.4	26	2	1	1	10	54782
65.6	2	NA	44	50	60	NA	108	104	102	NA	154	12.93	105.6	3.62	3.3	26	2	1	2	2	65013.6
94.3	2	NA	58	56	46	NA	102	104	108	NA	138	10.53	103.5	3.66	6.6	26	1	1	1	4	64568.7
73.8	2	NA	74	72	76	NA	110	114	114	NA	104	13.29	105.9	4.08	5.9	26	2	1	2	13	39658.3
74.4	2	NA	NA	78	76	72	NA	120	122	118	116	7.86	103.9	3.94	4.8	26	1	1	1	10	58591.7
118.1	NA	NA	80	78	76	NA	130	128	124	NA	87	24.9	102.4	4.46	7.7	26	1	1	2	2	42393.7
62.7	2	NA	64	62	74	NA	132	130	130	NA	110	7.47	100.5	3.94	5.6	26	1	1	2	2	58633.8
58	2	NA	70	66	66	NA	94	94	100	NA	124	6.64	99.1	4.31	4.2	27	2	1	2	2	43000.4
61.6	2	NA	52	NA	42	50	96	NA	100	98	126	9.19	102.7	3.74	4.4	27	2	1	1	4	5718.29
71.3	2	NA	62	62	NA	72	102	98	NA	96	89	6.68	108.4	3.85	3.7	27	2	1	1	5	47532.3
72.3	2	NA	60	60	64	NA	96	110	92	NA	96	22.46	104.9	3.7	2.8	27	2	1	1	3	61272.4
68.2	2	NA	64	74	70	NA	100	102	98	NA	84	4.85	103.3	3.95	4.6	27	2	1	1	4	96189.3
41.9	2	NA	NA	74	72	74	NA	110	108	106	70	6.96	102.5	3.89	4.5	27	2	1	1	8	44413.1
82.2	2	NA	70	72	68	NA	118	116	120	NA	72	15.15	101.9	4.26	5.1	27	1	1	1	3	60892.1
83.8	2	NA	72	74	62	NA	124	120	118	NA	148	10.54	105.6	4.37	6.9	27	1	1	2	2	49295.6
93.2	2	NA	90	82	88	NA	148	146	142	NA	97	31.45	108.6	3.91	5.9	27	1	1	2	2	54286.4
57.3	2	NA	56	58	58	NA	94	92	92	NA	90	6.44	103.5	4.09	3.5	28	2	1	1	6	47966
84.6	2	NA	52	NA	58	62	108	NA	98	96	116	21.32	106.5	4.33	5.8	28	1	1	1	4	97853.3
71.4	2	NA	60	NA	78	82	120	NA	118	114	148	13.83	100.7	3.81	5.8	28	1	1	1	4	63815.5
71.9	2	NA	70	72	70	NA	108	108	108	NA	82	10.66	102	4.07	3.6	29	2	1	2	6	7560.22
83	2	NA	NA	80	74	78	NA	110	104	112	112	10.67	101.6	3.95	4.6	29	2	1	1	4	52797.6
72.1	2	NA	NA	62	62	66	NA	108	114	110	130	9.09	100.3	4.29	5.9	29	1	1	2	4	47562.1
64.5	2	NA	66	66	68	NA	108	114	112	NA	82	15.6	103.4	4.22	3.3	29	2	1	1	13	37298.9
74.8	2	NA	74	74	78	NA	122	114	114	NA	123	15.7	104.9	4.2	6.6	29	2	1	1	10	55026.5
88.7	2	NA	66	64	NA	74	124	116	NA	124	120	22.16	103.2	3.82	5.4	29	2	1	2	2	42618.5
90.1	2	NA	82	90	NA	NA	132	134	NA	NA	144	20.59	107.3	4.02	4.3	29	2	1	2	2	46972.8
66.8	2	NA	NA	NA	NA	NA	NA	NA	NA	NA	118	13.02	98.9	3.74	4.5	29	2	1	2	13	51485.2
48.3	1	2	70	68	66	NA	98	102	102	NA	113	4.24	100.1	4.06	4	29	2	1	2	13	37300.6
109.6	1	2	NA	66	70	66	NA	122	124	126	119	22.53	103.1	4.19	3.9	29	2	1	1	5	59167
82.2	2	NA	56	46	46	NA	90	92	92	NA	131	10.88	104.9	4.05	3.7	30	2	1	1	13	4531.32
71.64	2	NA	60	62	60	NA	96	96	96	NA	160	10.55	106.6	3.96	5.1	30	2	1	2	3	3951.78
75.1	2	NA	74	74	NA	NA	98	102	NA	NA	103	9.7	104.6	3.93	5.2	30	2	1	1	4	56523.4
91.4	2	NA	56	58	64	NA	104	106	100	NA	125	14.17	103.6	4.12	3	30	2	1	1	10	8320.49
73.1	2	NA	60	70	70	NA	112	110	116	NA	122	7.43	99.8	4.12	2.6	30	2	1	2	13	4555.9
86	2	NA	66	NA	64	78	118	NA	116	112	160	11.43	104.8	4.22	6.3	30	1	1	1	12	60778
98.1	2	NA	66	NA	62	58	116	NA	116	114	138	16.36	108	4.69	5.9	30	1	1	1	5	50597.1
60.6	2	NA	72	NA	76	76	122	NA	118	122	144	9.55	101.8	4.47	4.9	30	1	1	1	10	51851.4
76.5	2	NA	68	60	62	NA	118	126	124	NA	166	5.99	101	4.16	6	30	1	1	1	13	40382.3
86.9	2	NA	88	86	84	NA	132	124	124	NA	118	21.59	97.8	3.99	7.9	30	1	1	2	13	44987.4
83.6	2	NA	72	70	76	NA	128	130	124	NA	131	19.17	104.2	4.38	6.2	30	1	1	1	10	50508.7
64.5	2	NA	64	68	60	NA	86	88	90	NA	84	9.6	103.6	4.68	4.4	31	2	1	2	6	45003.9
65.3	2	NA	62	68	66	NA	100	94	98	NA	130	12.67	104	4.35	4.2	31	2	1	1	13	35525.1
64.44	2	NA	74	NA	76	70	98	NA	102	96	114	8.38	99.8	3.59	4.5	31	2	1	2	3	4987.65
68.44	2	NA	70	72	74	NA	112	116	120	NA	73	15.28	102.1	3.82	3.3	31	2	1	2	3	36804.7
72.2	2	NA	72	76	NA	80	126	124	NA	128	123	9.46	103.8	4.08	6.4	31	1	1	1	6	53914.8
67.3	2	NA	58	68	62	NA	100	98	102	NA	120	13.75	105.9	3.58	2.6	32	2	1	2	2	3703.62
56.5	2	NA	64	NA	72	68	104	NA	108	106	105	3.15	104.9	3.98	3.3	32	2	1	1	4	57513.1
90.8	2	NA	76	78	78	NA	110	108	112	NA	118	6.26	104.6	4.03	3.7	32	2	1	2	12	42383.3
64.8	2	NA	56	56	62	NA	110	110	112	NA	95	16.55	105.8	3.95	2.6	32	2	1	2	13	34305.8
50.7	2	NA	70	64	68	NA	116	112	110	NA	108	3.29	101.8	4.47	4.8	32	1	1	1	12	52354.1
74	2	NA	66	56	60	NA	124	114	106	NA	136	17.33	109.4	4.49	5.4	32	2	1	1	5	45623.8
68	2	NA	70	70	70	NA	120	118	116	NA	120	12.78	107.7	4.21	2.2	32	2	1	1	12	46251.3
83.34	2	NA	76	66	76	NA	124	116	116	NA	144	13.47	101.6	3.93	5.8	32	1	1	2	3	40564
81	2	NA	78	78	82	NA	124	124	122	NA	152	11.62	99	4.17	4.7	32	1	1	1	13	33871.7
80.04	1	2	84	82	86	NA	128	128	114	NA	142	6.7	100	4.02	4.7	32	1	1	2	3	52120
77.6	2	NA	60	60	66	NA	104	100	106	NA	87	19.88	104.3	4.24	7.8	33	1	1	1	3	52677.4
69	2	NA	64	66	62	NA	106	110	112	NA	125	10.5	105.6	3.58	5.1	33	2	1	1	13	38706.7
71.7	2	NA	68	68	68	NA	110	108	110	NA	82	9.57	104.8	3.9	3.6	33	2	1	1	6	46691.3
56.8	2	NA	74	72	84	NA	112	112	110	NA	90	4.7	105.8	4.3	6	33	1	1	2	2	40972.1
72.1	2	NA	62	64	70	NA	122	110	110	NA	73	7.86	102.9	4.1	6.6	33	1	1	2	8	45692.8
94.14	2	NA	82	84	84	NA	108	120	122	NA	99	13.98	103.9	3.81	6.7	33	1	1	2	3	48052.7
79.2	2	NA	80	78	80	NA	120	126	124	NA	155	4.91	103.9	4.08	4.9	33	1	1	2	13	44576.8
89.9	NA	NA	80	76	NA	NA	134	140	NA	NA	149	19.5	102.2	4.31	7	33	1	1	1	13	45016.6
71.2	1	1	94	NA	108	102	166	NA	160	156	130	6.38	103	4.07	5.3	33	1	1	1	10	55368.3
62.64	2	NA	68	64	68	NA	86	86	86	NA	124	3.66	104.1	3.81	3.5	34	2	1	2	3	42750.7
81.94	2	NA	62	58	58	NA	92	88	90	NA	179	11.02	102	4.01	2.7	34	2	1	2	3	36826
75.6	2	NA	62	66	70	NA	98	100	102	NA	119	15.92	107.1	4.01	6.1	34	2	1	1	3	51252.7
38	2	NA	NA	64	64	66	NA	104	106	106	148	7.29	107	4.23	4.6	34	2	1	1	12	55145.4
65	2	NA	74	80	78	NA	112	110	116	NA	132	8.93	102.9	3.83	3.3	34	2	1	1	6	48839.9
65.5	2	NA	72	72	72	NA	120	114	120	NA	198	12.7	98.9	3.72	5.3	34	2	1	1	3	53030.6
98.1	2	NA	NA	78	NA	NA	NA	128	NA	NA	132	8.18	102.2	4.41	6.6	34	1	1	2	5	39669.6
85.1	1	1	78	NA	74	70	104	NA	102	94	112	14.14	104.9	3.83	5.1	34	2	1	2	2	50409.9
89.8	1	2	92	92	94	NA	132	134	136	NA	115	15.05	102.5	4.28	5.8	34	1	1	2	6	45147.4
58.74	2	NA	62	60	62	NA	86	82	86	NA	94	15.01	104	4.37	6.7	35	1	1	2	3	42272.6
62.74	2	NA	72	70	76	NA	120	120	122	NA	153	6.85	102.2	3.85	5.2	35	1	1	2	3	40840.3
82.6	2	NA	78	76	70	NA	122	128	120	NA	126	35.85	100.6	4.2	5.1	35	1	1	1	10	41359.5
92.1	2	NA	88	88	88	NA	122	126	122	NA	136	23.11	100.4	4.21	7.2	35	1	1	2	8	37136
99.1	1	2	NA	80	82	80	NA	134	126	130	142	26.49	105.2	3.94	8.5	35	1	1	2	13	50305.4
66.2	2	NA	52	50	46	NA	104	102	102	NA	103	8.82	102.5	3.78	4	36	2	1	1	4	5798.17
68.94	2	NA	62	62	56	NA	112	106	102	NA	101	7.03	102.5	4.64	4.9	36	2	1	2	3	44336.1
74.9	2	NA	66	66	64	NA	114	114	108	NA	103	12.12	103.6	3.93	3.9	36	2	1	2	8	40651.1
65.6	2	NA	70	66	74	NA	118	118	116	NA	99	3.8	101.3	4.43	4.7	36	1	1	1	6	53828.5
78.9	2	NA	76	76	80	NA	128	126	122	NA	136	5.16	102.5	4.44	6.1	36	1	1	2	13	45696.6
90.4	2	NA	84	80	80	NA	126	126	126	NA	144	12.4	102.6	4.28	3.8	36	1	1	1	4	63387.6
54.7	2	NA	NA	64	56	68	NA	136	146	128	75	7.14	100.2	3.82	4.8	36	2	1	1	5	55942.9
74.9	1	2	80	80	76	NA	130	116	116	NA	166	3.9	100.3	3.62	8.1	36	1	1	1	7	63916.5
108	1	2	NA	90	94	92	NA	124	126	128	190	20.68	106.4	4.52	6.5	36	1	1	1	12	44356.4
73	2	NA	64	70	68	NA	104	106	106	NA	151	8.94	103.1	4.39	7.3	37	1	1	2	6	50524.9
65.1	2	NA	84	78	82	NA	112	108	114	NA	94	7.33	101.7	3.94	4.3	37	2	1	1	4	47099.7
86.7	2	NA	78	74	78	NA	116	114	114	NA	128	11.11	96.9	3.85	6.8	37	1	1	1	3	69964.6
82.6	2	NA	70	74	78	NA	120	116	118	NA	125	21.36	102.7	4.19	5.5	37	2	1	1	3	61676.8
50.9	1	2	62	54	62	NA	92	94	94	NA	97	3.39	104	3.81	4.2	37	2	1	1	10	41616
80.2	2	NA	90	96	100	NA	150	138	136	NA	158	14.08	104	4.81	5.8	37	1	1	1	12	50665.5
84.4	2	NA	80	NA	80	84	144	NA	142	146	132	8.95	107.2	4.49	5.3	37	1	1	1	12	52976.1
70.3	2	NA	66	72	78	NA	112	114	110	NA	151	10.48	103.3	4.6	6.4	38	1	1	1	4	51143.2
81.6	2	NA	80	80	80	NA	120	112	114	NA	97	12.84	102.5	4.07	9.8	38	1	1	1	7	34988.2
114.1	2	NA	NA	74	84	78	NA	114	118	116	104	17.35	102.1	4.13	6.5	38	2	1	1	4	102746
72.6	2	NA	72	NA	NA	88	124	NA	NA	120	136	15.55	101.5	4.08	6.1	38	1	1	1	10	42063.1
84.7	1	1	NA	74	NA	78	NA	114	NA	110	117	11.46	104.9	4.07	6.1	38	1	1	1	4	96191.4
80.14	1	1	88	92	88	NA	126	128	120	NA	134	9.32	104.4	4.24	7.1	38	1	1	2	3	41410.7
68.1	2	NA	66	NA	NA	68	114	NA	NA	114	143	7.16	106.2	4.48	3.3	39	2	1	1	12	44394.3
92.3	1	2	72	76	74	NA	102	104	106	NA	142	11.37	103.2	4	4.9	39	2	1	2	2	38116.8
84.1	1	1	82	76	74	NA	130	132	128	NA	99	16.23	105.5	4.1	5.7	39	2	1	1	11	52396.6
67.5	2	NA	66	62	68	NA	104	98	102	NA	71	12.37	104.6	4.18	4	40	2	1	2	13	17168.2
72.2	2	NA	80	76	76	NA	106	110	102	NA	85	8.3	103.9	3.93	3.9	40	2	1	1	4	23664.3
72.1	2	NA	NA	82	NA	82	NA	118	NA	116	125	6.17	108.5	4.75	7	40	1	1	1	12	24777.2
72.9	2	NA	64	58	NA	70	126	132	NA	130	92	6.48	102.4	4.39	4.3	40	1	1	1	12	30530.2
88.5	2	NA	92	90	90	NA	126	118	116	NA	155	13.02	101.4	3.66	6.1	40	1	1	2	13	20495.2
75.8	1	1	94	86	88	NA	138	134	132	NA	142	15.89	101.3	3.91	3.5	40	2	1	2	13	18335.6
101.2	1	1	92	88	94	NA	142	154	156	NA	134	18.15	99.4	4.09	4.9	40	2	1	2	6	14575.3
76.9	2	NA	110	106	104	NA	148	152	154	NA	121	15.16	101.4	3.52	3.5	40	2	1	2	13	14980.6
62.7	2	NA	68	64	NA	66	98	98	NA	94	93	13.08	102.6	4.35	4.3	41	2	1	2	2	23638.9
60.3	2	NA	68	70	72	NA	104	102	100	NA	142	5.58	96.7	4.29	5.8	41	1	1	1	10	25853.8
76.3	2	NA	62	56	56	NA	110	104	104	NA	129	8.33	105.5	4.55	6.6	41	1	1	1	11	28308
59.3	2	NA	66	66	70	NA	116	108	108	NA	112	6.63	102.6	4.12	6.4	41	1	1	2	12	24310.3
80.3	2	NA	76	74	70	NA	114	112	112	NA	137	15.62	98.8	3.85	3	41	2	1	1	13	23740.9
77.2	2	NA	70	NA	80	78	124	NA	122	126	124	9.2	103.5	4.28	4.6	41	2	1	1	4	20295.2
88	2	NA	NA	78	84	84	NA	126	128	122	122	29.32	103.7	3.68	3.5	41	2	1	2	13	16176.8
67.6	1	1	132	128	NA	136	208	198	NA	200	144	18.81	100.1	4.19	4.5	41	1	1	1	4	25976.3
80.4	2	NA	60	64	62	NA	94	100	98	NA	105	8.15	103.6	3.91	3.7	42	2	1	1	3	23991.8
85.64	2	NA	66	68	70	NA	100	98	94	NA	102	13.96	105.5	4.42	3.7	42	2	1	2	3	15415.4
84.3	2	NA	64	NA	NA	NA	100	NA	NA	NA	149	16.99	98.9	4.17	4.2	42	2	1	2	2	17924.7
81.2	2	NA	70	68	66	NA	104	104	100	NA	159	7.5	102.6	4.64	4.8	42	1	1	1	6	30419.6
75.5	2	NA	64	NA	62	66	110	NA	102	102	113	12.46	105.3	4.22	3.2	42	2	1	2	10	21818.9
94.5	2	NA	68	64	66	NA	116	100	104	NA	122	13.17	104.6	4.33	3.5	42	1	1	2	6	23664.7
74.2	2	NA	80	80	76	NA	118	120	120	NA	137	7.32	103.6	3.72	4.6	42	2	1	2	8	21600.4
78.6	2	NA	80	80	76	NA	116	124	120	NA	122	20.24	103.5	3.99	5	42	2	1	1	3	28091
81.2	2	NA	78	78	NA	76	126	120	NA	126	149	14.82	101.4	3.93	5.2	42	1	1	2	2	22001.8
72.3	2	NA	76	78	78	NA	124	130	124	NA	127	8.95	101.4	4.08	3.6	42	2	1	2	6	16088.1
127.1	2	NA	84	88	78	NA	134	128	136	NA	174	36.97	108.6	4.82	5.7	42	1	1	1	12	21076.6
91.5	1	2	68	70	68	NA	116	116	116	NA	72	6.92	102.1	3.76	4	42	1	1	2	13	34830.3
92.3	1	2	72	76	82	NA	122	120	122	NA	152	9.27	102.3	4.28	5.9	42	1	1	1	4	25976.3
81.1	2	NA	54	58	62	NA	112	106	118	NA	104	7.89	104.8	4.17	5.5	43	1	1	2	10	31424.9
82.7	2	NA	76	78	72	NA	110	116	112	NA	177	8.05	102.3	4.1	4.5	43	2	1	2	6	12050.2
70.5	2	NA	60	64	64	NA	116	114	110	NA	101	4.73	100.4	4.63	4.5	43	1	1	1	13	25302.7
75.5	2	NA	78	80	76	NA	110	116	116	NA	122	3.94	104.4	3.94	3.6	43	1	1	2	6	18612.7
71.7	2	NA	68	76	78	NA	124	124	118	NA	113	12.18	101.8	4.17	3.2	43	2	1	2	8	13835.3
75.5	2	NA	80	82	88	NA	136	142	136	NA	213	26	102.9	4.28	4.1	43	2	1	1	5	20712.2
71	2	NA	92	96	102	NA	140	136	140	NA	225	9.63	99.9	4.05	5.3	43	1	1	2	6	22957.3
102.2	2	NA	90	90	62	NA	140	138	148	NA	137	28.99	102.9	4.25	6.7	43	1	1	2	13	28239.8
85.3	2	NA	64	70	70	NA	112	108	104	NA	129	30.62	100.9	3.95	4.2	44	2	1	2	10	16837.2
71.34	2	NA	68	68	74	NA	114	114	116	NA	121	10.2	107.2	4.19	2.7	44	2	1	1	3	16433.2
81.1	2	NA	NA	0	0	0	NA	114	116	114	92	9.08	104.1	4.75	5.8	44	1	1	1	4	29964.9
108.5	2	NA	NA	NA	70	NA	NA	NA	116	NA	104	14.98	103.8	4.42	5.5	44	2	1	2	5	15334.5
69.1	2	NA	78	NA	80	NA	124	NA	124	NA	168	9.49	105.1	4.32	4.8	44	2	1	1	4	18289
55.1	2	NA	82	78	78	NA	132	124	120	NA	165	6.62	97.9	4.31	6.1	44	1	1	2	6	25530.4
128.5	1	1	70	68	NA	68	122	118	NA	110	110	6.07	96.2	4.43	3.5	44	2	1	2	5	24079
52.84	1	2	92	94	92	NA	136	134	128	NA	151	3.77	101.5	4.09	4	44	2	1	2	3	18003.3
105.4	1	1	90	92	84	NA	144	144	136	NA	125	19.97	107.1	3.76	4.1	44	2	1	1	3	25512.4
55.34	2	NA	64	66	64	NA	102	98	96	NA	144	6.26	99.8	4.62	4.4	45	2	1	2	3	16252.2
66.5	2	NA	72	74	70	NA	102	106	102	NA	208	8.99	101.9	4.51	4.6	45	1	1	2	6	26786.4
100.2	2	NA	64	58	NA	58	106	106	NA	108	86	7.02	103.7	3.88	4.9	45	2	1	1	4	20560
83.7	2	NA	68	66	NA	70	114	108	NA	112	106	21.84	103.2	3.73	2.2	45	2	1	1	11	37649.9
63.8	2	NA	70	72	66	NA	114	116	108	NA	97	11.15	99.3	3.92	4.5	45	2	1	1	4	23461.7
76.8	2	NA	72	74	78	NA	114	112	112	NA	88	9.64	101.9	4.1	3.7	45	2	1	2	2	17072.3
78.8	2	NA	NA	80	72	84	NA	118	120	124	143	13.83	100.3	3.95	3.5	45	2	1	1	6	28825
77.9	2	NA	90	86	78	NA	126	124	116	NA	88	8.23	104.1	4.67	5.2	45	1	1	2	6	26211.2
88.3	2	NA	82	80	82	NA	120	128	122	NA	145	17.7	103.5	3.94	4.4	45	2	1	2	6	15379
62.8	2	NA	72	64	64	NA	124	124	126	NA	151	17.38	104.3	3.94	4.7	45	2	1	1	4	22519.8
65.9	1	2	76	82	NA	88	130	128	NA	126	122	20.69	101.1	3.47	6.4	45	2	1	1	5	19247.3
70.3	NA	NA	NA	92	96	90	NA	142	142	144	116	19.06	105.7	3.57	3.9	45	2	1	2	2	13124
71.6	2	NA	66	70	72	NA	106	108	108	NA	117	4.31	102.7	4.66	2.6	46	2	1	1	12	18336.7
90	2	NA	70	68	66	NA	126	122	118	NA	129	14.17	104.6	3.59	3.7	46	2	1	2	13	13148.6
76	2	NA	68	NA	76	78	130	NA	124	126	206	8.68	104.1	4.55	5.9	46	1	1	2	2	21021.9
107.2	1	2	90	100	96	NA	116	122	110	NA	90	20.83	102.9	3.91	5.1	46	2	1	1	3	21299.5
62	2	NA	70	78	70	NA	142	142	136	NA	89	6.39	104.3	3.84	5.8	46	1	1	1	3	35144.9
97.8	2	NA	62	NA	NA	NA	114	NA	NA	NA	94	9.08	100.8	4.11	6	47	1	1	2	5	22952.5
55.2	2	NA	72	70	74	NA	116	114	114	NA	141	22.26	102.6	3.88	5.3	47	2	1	1	10	17732.3
81.9	1	1	78	70	72	NA	104	104	110	NA	121	10.53	102.4	4.36	5.3	47	1	1	1	3	30676.8
89.9	1	2	90	92	86	NA	120	120	120	NA	141	18.7	98.1	4.04	6.7	47	1	1	1	6	24587.1
56.9	1	1	74	80	78	NA	122	124	126	NA	155	6.29	101.7	4.22	4.8	47	2	1	2	6	17600
89.8	1	1	62	60	62	NA	128	128	120	NA	137	7.97	104.6	4.14	6	47	1	1	1	4	29687.3
75.3	2	NA	70	74	70	NA	106	110	114	NA	133	6.38	106.8	4.11	4.6	48	1	1	1	3	34554.4
53.5	2	NA	76	80	74	NA	112	118	110	NA	163	8.96	102.4	4.19	4.9	48	1	1	2	8	22995.3
79	1	1	88	82	82	NA	106	104	104	NA	98	29.53	99.7	3.8	4	48	2	1	1	11	19450
69.04	1	1	NA	84	88	86	NA	114	108	126	119	16.15	103.7	3.75	4.1	48	2	1	2	3	16721.6
71.3	2	NA	84	NA	76	82	148	NA	138	146	123	12.74	104	3.83	4.1	48	2	1	1	10	15661.8
74.2	2	NA	94	NA	94	96	160	NA	154	146	122	12.5	102.7	3.93	4.5	48	2	1	2	6	15102.5
65.2	1	2	96	96	88	NA	162	160	164	NA	133	32.65	106.7	4.29	5.5	48	2	1	1	4	18882.1
54.9	2	NA	58	58	62	NA	102	98	98	NA	91	4.41	103.5	4.25	4.2	49	1	1	1	5	30971.7
109.54	2	NA	74	76	76	NA	112	106	96	NA	121	8.17	107	4.45	5.6	49	1	1	1	3	24138
97.7	2	NA	68	66	70	NA	102	114	116	NA	120	28.23	102.7	4.19	4.8	49	2	1	1	3	22224
68	2	NA	80	82	76	NA	118	110	120	NA	180	6.69	100	3.78	4.1	49	2	1	1	4	35749.3
72.5	2	NA	90	86	86	NA	134	132	128	NA	138	17.73	104.8	4.23	6.3	49	1	1	1	4	29964.9
79.2	1	2	74	NA	70	NA	126	NA	130	NA	142	6.32	101.9	4.32	6.3	49	1	1	2	5	23569.1
134.7	2	NA	NA	NA	90	92	NA	NA	144	148	159	20.63	102.5	3.86	6.4	49	1	1	1	6	22440.3
46.3	2	NA	64	66	64	NA	104	96	96	NA	82	4.4	101.9	4.17	2.1	50	2	1	2	13	16123.2
80.3	2	NA	68	70	74	NA	130	124	124	NA	192	7.25	104.1	4.24	4.1	50	2	1	1	3	29406.2
74.1	2	NA	86	86	84	NA	130	126	132	NA	154	19.65	104.2	4.12	7.4	50	1	1	1	5	26363
49.34	2	NA	72	74	68	NA	120	114	110	NA	145	4.88	103.8	4.14	2.8	51	2	1	2	3	16464.2
50.5	2	NA	66	60	62	NA	112	122	114	NA	126	5.32	101.8	4.18	3.2	51	2	1	2	2	19264.8
79.24	2	NA	88	84	82	NA	116	116	120	NA	145	9.69	102.1	4.36	6.8	51	1	1	2	3	27540
90.6	2	NA	56	72	68	NA	120	118	118	NA	122	4.41	104.6	3.77	3.6	51	2	1	1	4	22107.8
86.1	2	NA	90	82	82	NA	146	128	136	NA	163	5.14	98.8	4.37	7.4	51	1	1	1	12	27754.2
80.9	1	1	78	76	80	NA	134	132	126	NA	119	21.72	105.8	4.01	4.5	51	2	1	1	11	19450
119.8	1	1	NA	86	90	94	NA	136	134	128	125	19.16	102.5	3.86	6.9	51	1	1	1	4	27195.1
88	1	2	80	82	84	NA	136	132	134	NA	186	10.89	98.6	3.96	6.5	51	1	1	2	13	19853.8
94.2	1	1	NA	76	66	62	NA	132	138	140	70	14.15	100.8	3.48	7.1	51	1	1	1	10	21624.6
89.9	1	2	80	82	84	NA	142	140	130	NA	129	9	101.2	3.43	4.5	51	1	1	1	3	46006
60.54	2	NA	74	72	72	NA	116	112	104	NA	123	9.32	107.1	4.61	3.6	52	2	1	2	3	17820.6
82.8	2	NA	80	84	76	NA	124	112	122	NA	145	13.18	103.3	4.03	5.3	52	2	1	1	4	20805.2
63.2	2	NA	74	76	70	NA	126	128	122	NA	133	6.89	95.8	4.26	4.5	52	2	1	1	13	22830.1
62.8	2	NA	76	76	78	NA	126	130	126	NA	110	14.14	106.1	4.4	6	52	1	1	1	13	21472.4
62.8	2	NA	70	66	74	NA	126	134	126	NA	129	17.39	103.1	3.5	5.7	52	2	1	2	2	16529.2
54.7	1	1	66	60	66	NA	112	112	110	NA	135	12.67	108.5	3.82	2.1	52	2	1	1	13	13225.3
68.4	1	2	80	78	70	NA	128	130	130	NA	112	26.65	98.3	3.81	6.2	52	2	1	2	6	12553.8
56.5	2	NA	82	72	78	NA	142	142	136	NA	156	3.52	99.3	3.86	3.6	52	2	1	1	6	21993.9
61.8	1	2	94	96	94	NA	142	144	140	NA	223	9.2	100.7	4.58	4.9	52	2	1	1	12	20313.3
69.9	1	1	90	88	84	NA	172	166	170	NA	88	6.91	102.9	3.61	4.5	52	2	1	1	4	18882.1
67	2	NA	NA	76	74	72	NA	104	98	106	130	8.49	105.1	4.81	5.1	53	2	1	1	5	18025.8
77.4	NA	NA	70	68	76	NA	114	122	110	NA	190	10.46	101.1	4.34	5	53	1	1	1	3	32221.5
108	NA	NA	70	68	NA	NA	122	122	NA	NA	106	10.72	106.2	4.02	5.9	53	2	1	2	2	15849.7
77.1	2	NA	70	70	70	NA	132	122	126	NA	105	15.07	94.7	4.5	4.4	53	1	1	2	13	16533.7
124.3	2	NA	70	70	68	NA	140	126	124	NA	175	32.88	99.4	4.31	5.3	53	1	1	1	3	40731.3
56.4	1	2	68	68	68	NA	100	106	106	NA	149	6.1	106.3	4.22	5.4	53	2	1	1	3	18279.3
54.5	1	2	NA	76	66	68	NA	138	128	134	123	11.83	104	3.94	4	53	2	1	1	6	16815.7
79.9	2	NA	96	94	88	NA	140	140	142	NA	141	23.02	101	4.49	7.7	53	1	1	2	13	22347.7
70.2	2	NA	NA	84	74	NA	NA	122	114	NA	146	14.32	104.5	3.78	6.4	54	1	1	2	2	28939.3
60.6	1	1	50	50	NA	NA	86	84	NA	NA	179	5.95	101.4	3.16	5	54	2	1	1	3	22372
73.5	1	2	76	66	70	NA	120	110	102	NA	166	5.6	102	4.24	5.1	54	2	1	1	3	23962.2
64.7	1	1	NA	66	66	66	NA	120	118	110	116	8.87	101.9	4.37	5.4	54	2	1	1	3	17602.1
92.44	2	NA	92	98	96	NA	130	126	124	NA	178	7.58	104	4.95	6.6	54	1	1	2	3	25498
71.4	1	1	NA	90	90	78	NA	144	142	138	122	10	97.4	3.99	4.4	54	2	1	1	12	20313.3
78.2	2	NA	72	74	74	NA	146	140	142	NA	113	12.68	106.1	4.08	4.8	54	2	1	2	13	15120.3
49	1	1	92	76	74	NA	162	142	140	NA	111	4.55	99.6	4.07	4.8	54	2	1	1	3	15771.2
82.9	2	NA	80	80	78	NA	146	150	148	NA	192	12.57	101	3.98	6	54	2	1	1	3	22533.9
76.5	2	NA	64	68	62	NA	128	122	120	NA	106	9.6	106.1	4.49	3.2	55	2	1	1	5	18690.5
56.8	2	NA	64	58	62	NA	124	122	126	NA	131	9.37	103.8	3.86	4.5	55	2	1	1	4	20391.9
79.6	2	NA	74	72	78	NA	104	106	108	NA	94	13.01	97.5	3.85	4.5	56	2	1	2	6	16280
85.9	2	NA	78	86	78	NA	110	112	106	NA	81	20.03	99.4	4.2	4.1	56	1	1	2	6	33790.9
52.6	2	NA	68	68	70	NA	122	116	116	NA	101	5.68	105.2	3.78	1.8	56	2	1	2	2	18226.5
84.2	2	NA	74	74	76	NA	130	126	130	NA	100	37.93	101	4.08	7.7	56	1	1	2	6	26786.4
77.5	1	1	70	78	80	NA	116	114	108	NA	107	12.8	102.5	4.05	3.3	56	2	1	1	3	19214.7
62.7	2	NA	64	64	62	NA	108	106	110	NA	86	4.26	106	4.38	4.8	57	2	1	2	6	17299.3
118.3	2	NA	80	80	78	NA	128	116	124	NA	144	22.55	101.4	4.18	5.6	57	2	1	1	3	23559
86.4	2	NA	86	86	84	NA	124	132	128	NA	146	10.33	101.5	4.23	7.5	57	1	1	1	3	34554.4
82	2	NA	82	82	78	NA	136	136	132	NA	148	16.6	103.4	3.73	4.7	57	2	1	1	3	22113.5
74.6	2	NA	NA	NA	NA	92	NA	NA	NA	140	186	18.2	102.6	4.36	4.1	57	2	1	1	13	13427.3
52	2	NA	68	80	60	NA	142	140	150	NA	167	11.81	108.4	4.15	2.5	57	2	1	2	2	18903.3
51.8	1	1	92	84	NA	84	154	152	NA	150	95	14.01	97.1	3.59	4	57	2	1	1	10	19081.6
62.4	2	NA	80	82	76	NA	162	152	148	NA	130	11.71	100.4	4.07	5.3	57	1	1	1	6	28362.4
87.24	2	NA	62	66	66	NA	112	110	114	NA	89	22.37	101.7	4.16	4.5	58	2	1	2	3	16329.7
59.2	2	NA	78	80	78	NA	122	118	122	NA	112	7.78	98.3	3.9	3.5	58	2	1	1	10	16382.7
56.74	2	NA	56	58	60	NA	114	116	108	NA	158	12.02	102.3	3.92	6.8	59	1	1	2	3	26599.1
74.2	2	NA	74	64	80	NA	122	120	128	NA	96	18.38	105.3	4.31	5.4	59	1	1	1	12	38513.7
69.4	2	NA	NA	70	68	66	NA	124	130	118	130	5.64	100.7	4.56	5.8	59	2	1	2	5	16103.5
128.04	1	1	76	80	78	NA	128	126	126	NA	160	22.54	100.8	3.68	6.7	59	1	1	2	3	22108.6
61.6	2	NA	58	56	NA	64	92	92	NA	82	115	5.3	101.8	4.2	4.5	60	1	1	1	4	4440.28
67.3	NA	NA	70	72	68	NA	100	102	108	NA	213	6.85	100.4	3.96	4.5	60	1	1	2	6	3124.31
70	2	NA	76	74	78	NA	122	118	122	NA	155	6.57	102.6	3.91	5.3	60	1	1	2	6	5932.04
67.8	2	NA	64	70	70	NA	128	126	128	NA	119	6.92	104	4.17	6	60	1	1	1	13	4097.48
61.3	2	NA	80	74	72	NA	136	136	130	NA	107	11.19	104.2	4.13	3.7	60	2	1	2	6	4877.35
97.1	1	1	54	62	64	NA	122	126	126	NA	148	34.84	97	3.86	5.9	60	1	1	2	10	8197.5
77.6	2	NA	68	70	NA	58	148	142	NA	134	207	10.16	99.3	4.32	4.3	60	1	1	2	5	4169.12
74.5	2	NA	80	78	78	NA	144	138	146	NA	192	20.87	100.9	4.04	7.2	60	1	1	1	12	6342.86
92.6	1	1	NA	80	76	NA	NA	146	146	NA	140	8.26	101.7	4.18	7.9	60	1	1	2	10	10810.8
61.8	1	1	72	78	78	NA	152	152	156	NA	111	11.46	106.4	4.33	5.8	60	2	1	2	6	4909.58
60.2	1	2	78	80	78	NA	166	162	164	NA	91	5.02	106.2	4.1	6.5	60	2	1	1	4	6026.66
93.64	2	NA	86	84	82	NA	176	172	184	NA	138	30.24	103.4	4.07	8.2	60	1	1	2	3	3299.16
60.1	1	2	78	86	82	NA	198	196	186	NA	165	9.89	102.5	3.83	4.9	60	2	1	1	6	8327.71
81.6	2	NA	70	60	60	NA	110	100	104	NA	159	5.92	104.9	4.39	5.2	61	1	1	1	3	4730.52
73.2	2	NA	78	78	74	NA	120	116	118	NA	92	24.65	99.4	3.89	4.8	61	1	1	2	13	5914.24
72.7	2	NA	80	80	80	NA	128	128	120	NA	225	11.74	104.3	3.83	6.7	61	1	1	2	13	2902.32
136.2	2	NA	NA	72	90	84	NA	122	124	130	169	53	102.1	4.55	5.3	61	2	1	2	6	6682.43
97.1	2	NA	88	88	88	NA	142	132	132	NA	221	9.74	108.6	4.31	5.2	61	1	1	1	12	8534.28
70.6	2	NA	76	70	76	NA	142	136	140	NA	156	8.88	103.6	4.34	5.6	61	1	1	1	5	12902.4
80.2	1	1	88	80	78	NA	124	128	130	NA	67	7.78	102.7	4.2	4.2	61	2	1	1	3	10015.6
94.5	1	1	80	82	78	NA	132	132	126	NA	145	18.07	103.4	4.38	5.8	61	1	1	1	13	4003.84
92.3	1	2	82	80	88	NA	138	134	136	NA	183	18.1	101.2	4.14	6.2	61	1	1	2	6	2954.55
63.1	2	NA	NA	74	76	78	NA	148	142	146	110	17.12	102.4	4.57	4.9	61	2	1	2	6	4869.23
59.8	2	NA	90	94	92	NA	154	146	154	NA	106	12.85	103.8	4.29	5.2	61	2	1	1	10	7750.7
90.1	2	NA	NA	76	68	NA	NA	154	154	NA	79	34.11	100.4	4.14	4.8	61	1	1	1	3	6778.35
81.5	1	1	74	74	68	NA	162	164	156	NA	98	28.68	102.1	4.01	3.2	61	2	1	1	5	10311.4
79.6	1	1	NA	84	80	82	NA	168	160	162	139	14.49	106.6	4.76	4.4	61	2	1	2	6	4272.46
58.2	2	NA	120	94	94	NA	180	168	160	NA	156	5.87	102.8	4.64	4.4	61	1	1	1	10	6292.67
79.44	2	NA	68	64	70	NA	102	102	102	NA	130	7.53	105.8	4.38	5.6	62	1	1	2	3	4990.31
90.24	2	NA	74	76	76	NA	108	104	112	NA	90	32.12	104.1	4.29	5.7	62	2	1	2	3	5934.18
76.9	2	NA	90	88	86	NA	130	124	122	NA	88	19.75	103.3	4.3	6.9	62	1	1	1	3	12365.3
74.6	2	NA	90	84	84	NA	134	130	132	NA	134	21	102.5	4.11	6.6	62	2	1	1	3	9583.63
70.9	2	NA	70	66	60	NA	136	132	134	NA	150	18.09	102.8	3.77	6.6	62	2	1	1	3	13354.1
63.3	1	1	52	54	52	NA	120	118	112	NA	87	16.4	97.5	3.91	5.9	62	2	1	2	6	10248.2
69.9	2	NA	76	74	78	NA	144	144	148	NA	118	9.13	97.4	3.74	5.6	62	2	1	1	6	11036.9
116	2	NA	90	88	84	NA	158	146	142	NA	145	7.92	104.8	4.26	8	62	1	1	2	6	6549.34
44.9	1	1	NA	0	36	NA	NA	154	146	NA	129	5.33	100.5	4.34	5.6	62	2	1	2	10	5949.19
79.2	1	1	90	90	90	NA	152	152	148	NA	88	10.99	108.5	4.01	6.2	62	1	1	1	4	5188.04
61.9	2	NA	70	68	70	NA	154	152	148	NA	98	13.32	105.1	3.72	4.6	62	2	1	1	3	7187.72
69.8	1	1	30	NA	20	14	152	NA	154	164	125	9.72	99.8	4.05	2.8	62	2	1	1	4	9168.88
67.7	1	2	68	68	74	NA	160	164	168	NA	134	6.73	106.3	4.64	4.6	62	1	1	2	13	6349.55
85.2	1	1	0	NA	0	0	182	NA	168	174	107	21.66	98.7	3.85	3.7	62	1	1	1	3	17805.7
62	2	NA	68	68	64	NA	110	114	114	NA	122	9.82	105.1	4.46	5.8	63	2	1	2	6	4877.35
65.3	2	NA	NA	80	82	78	NA	120	118	120	128	7.73	107.7	4.39	6.6	63	1	1	1	12	5182.44
74.3	2	NA	NA	0	48	NA	NA	122	126	NA	90	14.76	104.6	4.25	4.1	63	2	1	1	4	9418.1
120.3	2	NA	80	86	76	NA	128	126	128	NA	120	16.11	108.9	4.11	5	63	1	1	1	10	7221.42
78	2	NA	62	68	74	NA	140	146	136	NA	37	17.94	109	4.3	5	63	2	1	2	2	6305.4
75.7	2	NA	80	74	70	NA	156	152	156	NA	125	7.97	102.6	4.82	4.3	63	1	1	1	3	4790.31
85.4	1	2	80	78	84	NA	154	160	154	NA	140	9.16	101.1	4.37	6.1	63	1	1	1	3	4031.77
56.9	2	NA	40	40	44	NA	100	94	96	NA	75	11.67	106.2	4.18	5.1	64	2	1	1	13	6874.94
70.5	2	NA	74	74	NA	78	112	120	NA	120	120	9.39	101.6	4.01	5.1	64	1	1	1	12	3871.54
69.5	2	NA	68	70	74	NA	116	116	124	NA	85	14.51	103	4.26	5.8	64	2	1	1	1	12982.4
91.1	2	NA	72	76	78	NA	136	130	124	NA	139	21.33	97	3.8	5.7	64	1	1	1	3	4692.31
89.5	2	NA	78	78	78	NA	142	136	132	NA	143	13.57	107.4	3.82	5.2	64	2	1	1	10	15087.8
111.6	2	NA	76	80	74	NA	134	144	136	NA	117	40.51	100.8	4.16	5.8	64	1	1	1	13	6373.05
114.7	1	1	70	74	68	NA	108	112	108	NA	134	11.07	102.1	4.17	7.3	64	1	1	1	3	5276.19
62.5	1	2	80	80	80	NA	134	130	130	NA	91	13.51	99.9	3.7	5	64	2	1	2	13	4142.35
117.6	1	1	NA	60	50	52	NA	136	134	126	99	31.92	104.3	3.94	4.7	64	1	1	1	4	3961.97
85.1	1	2	90	82	88	NA	150	142	142	NA	125	9.99	102	4.05	6.8	64	1	1	1	6	6243.33
98.5	1	1	NA	84	82	86	NA	150	148	154	124	24.24	105.8	3.74	5.1	64	2	1	2	6	7082.86
55.9	2	NA	76	72	NA	70	162	150	NA	150	106	9.19	100.9	3.96	6	64	1	1	1	4	4711.21
56.3	2	NA	96	92	92	NA	178	164	154	NA	264	5.72	102.4	3.79	4	64	2	1	2	13	3970.36
74.64	2	NA	68	66	62	NA	124	114	110	NA	188	3.94	103.8	4.51	3.9	65	1	1	2	3	5437.28
95.6	2	NA	72	80	74	NA	116	120	120	NA	198	43.5	101.9	5.14	7.4	65	1	1	2	6	2934.84
72.5	2	NA	76	70	74	NA	128	130	124	NA	118	19.54	102.3	4.03	5.4	65	2	1	1	3	10015.6
73.6	1	1	0	0	0	NA	144	130	124	NA	195	8.85	101	3.62	4.8	65	2	1	1	10	12018.8
75.2	1	1	64	60	68	NA	150	148	146	NA	128	24.13	98.5	4.25	6.5	65	2	1	1	3	13354.1
76.6	2	NA	64	74	72	NA	150	146	152	NA	125	24.63	100.2	4.09	5.2	65	1	1	1	4	9636.6
70.8	2	NA	70	74	74	NA	164	154	148	NA	132	11.94	105.4	4.1	6.3	65	1	1	2	3	4619.19
71.5	1	1	NA	68	66	68	NA	156	162	152	153	12.48	101.7	4.43	4.8	65	2	1	1	12	23834.7
88.5	2	NA	102	98	100	NA	180	200	198	NA	120	11.4	108.7	4.69	7.1	65	1	1	1	10	11126.2
57.9	2	NA	64	70	70	NA	94	98	98	NA	110	42.04	106	4.14	2.4	66	2	1	1	4	5540.45
97.4	2	NA	NA	76	82	78	NA	132	124	128	157	34.65	98.9	3.96	6.6	66	1	1	1	3	5713.58
87.2	2	NA	78	74	NA	NA	134	130	NA	NA	91	21.71	104.3	4.16	5.2	66	1	1	1	4	6709.44
74.2	2	NA	66	NA	66	76	142	NA	134	122	131	17.11	103.5	4.31	4.1	66	2	1	2	2	5372.77
65.9	2	NA	80	68	72	NA	144	142	124	NA	134	18.33	103.2	4.45	6.9	66	1	1	2	13	4198.38
78.4	1	1	70	80	76	NA	118	120	118	NA	81	7.5	97.7	3.9	8.1	66	1	1	1	4	8900.92
62.7	1	2	60	60	54	NA	122	120	122	NA	153	6.77	102.7	4.35	5.7	66	1	1	1	3	5167.99
100.7	1	2	86	88	90	NA	148	144	144	NA	116	66.02	99.5	3.39	4.9	66	1	1	1	13	3626.26
73.7	1	1	80	84	80	NA	172	164	164	NA	150	23.2	100.6	3.73	4.6	66	2	1	1	3	10015.6
93.2	1	1	80	80	82	NA	170	166	164	NA	129	22.44	103.5	4.16	7	66	1	1	1	6	3986.48
70.4	1	1	98	NA	92	92	172	NA	164	178	140	15.55	95.3	3.77	6.1	66	2	1	1	12	8055.72
68.4	2	NA	104	110	108	NA	204	198	200	NA	111	26.55	105	3.87	6.5	66	2	1	1	13	4201.02
94.5	2	NA	66	66	68	NA	110	116	116	NA	136	23.51	102.5	4.1	6.3	67	2	1	1	12	9019.43
75.3	2	NA	70	70	74	NA	116	114	116	NA	91	28.3	101.9	4.13	5.1	67	1	1	2	13	3941.43
93	1	1	64	64	64	NA	118	114	112	NA	106	19.19	102.3	3.8	6.6	67	1	1	1	6	5064.45
68.84	1	1	84	84	82	NA	134	130	126	NA	100	10.96	103.2	4.18	4.6	67	2	1	2	3	6832.06
97.4	1	1	78	76	74	NA	138	130	138	NA	150	16.15	102.9	4.16	4.8	67	2	1	2	6	4272.46
104.3	2	NA	98	92	90	NA	154	160	154	NA	117	20.48	100.3	4.44	8	67	1	1	2	6	4656.3
57.14	1	2	56	48	48	NA	170	156	148	NA	135	10.95	105	3.92	5.1	67	2	1	2	3	4212.27
75.7	1	1	NA	66	70	60	NA	166	166	162	158	11.32	100.8	4.01	6.1	67	2	1	1	13	4065.61
102.64	2	NA	70	70	72	NA	122	124	118	NA	94	18.18	105.4	4.14	6.4	68	2	1	2	12	7203.62
58.4	2	NA	58	66	64	NA	128	128	132	NA	120	5.77	102.8	4.66	5.4	68	2	1	1	3	7340.69
70.5	2	NA	82	90	88	NA	144	140	140	NA	106	12.68	98.8	3.86	5.1	68	2	1	1	13	7729.97
66.9	1	1	54	42	42	NA	142	146	140	NA	163	31.93	98.8	4.22	4.5	68	2	1	1	12	8757.95
89.8	1	1	94	90	92	NA	148	144	144	NA	171	12.96	102.5	4.35	4.5	68	2	1	2	6	5391.65
76.34	1	1	72	72	70	NA	154	152	140	NA	178	14.28	102.5	4.91	4.9	68	1	1	2	3	3965.89
73.4	2	NA	70	68	80	NA	160	148	148	NA	149	9.75	100.2	3.56	4.7	68	2	1	1	3	6465.24
75.2	1	1	90	90	84	NA	166	160	152	NA	59	19.99	104.2	4.01	5.3	68	1	1	1	13	5239.06
76.9	2	NA	NA	82	80	82	NA	164	164	154	108	16.84	100.6	3.66	2.6	68	1	1	1	12	13485.4
71.4	2	NA	74	78	76	NA	126	120	124	NA	117	6.67	99.7	3.9	4.5	69	1	1	1	13	6859.17
46.4	2	NA	72	70	72	NA	136	130	130	NA	159	5.37	103.1	3.72	3.6	69	2	1	2	10	9795.84
71.3	1	1	64	60	56	NA	124	124	126	NA	96	8.81	97.7	3.99	4	69	2	1	1	2	12831.3
68.6	1	2	70	74	70	NA	122	138	130	NA	97	12.4	103.9	4.67	5.6	69	1	1	1	3	4220.95
95.24	1	1	82	76	82	NA	136	138	134	NA	148	20.66	103.6	4.03	4.9	69	2	1	2	3	6832.06
54.9	2	NA	70	68	70	NA	156	154	152	NA	109	13.55	102.2	4.15	5	69	2	1	1	3	7340.69
78	1	1	72	NA	70	NA	164	NA	156	NA	103	25.48	102.8	3.95	6.7	69	2	1	1	12	14015.8
50.3	1	1	NA	88	80	84	NA	178	172	160	56	7.33	100.5	3.56	4	69	2	1	1	4	8070.4
62.3	1	1	110	110	110	NA	228	222	210	NA	104	11.76	104.1	4.08	4.9	69	1	1	1	3	12027.7
48.4	2	NA	82	NA	NA	76	230	NA	NA	214	156	17.44	98.7	4.16	3.6	69	2	1	2	10	8742.79
95.3	2	NA	70	70	72	NA	118	112	114	NA	186	13.38	102.5	3.64	7.5	70	1	1	1	6	4334.16
83.9	2	NA	74	74	68	NA	130	124	128	NA	134	9.82	100.2	4.35	3.5	70	1	1	2	6	6452.11
74.2	2	NA	60	56	60	NA	134	124	126	NA	119	11.46	100	4.09	5.4	70	2	1	1	6	8565.58
78.1	2	NA	78	78	78	NA	134	126	124	NA	97	18.29	105.4	4.93	7.6	70	1	1	1	13	3415.15
60.8	2	NA	82	76	76	NA	144	130	126	NA	151	10.38	99.8	4.36	6	70	1	1	2	13	2631.2
66.1	1	1	68	64	NA	66	138	140	NA	126	133	11.77	105.6	4.09	4.8	70	2	1	1	4	5608.71
94.7	2	NA	80	88	82	NA	144	138	140	NA	121	18.71	105.2	4.78	5.1	70	1	1	1	13	3351.17
48.7	2	NA	NA	66	68	70	NA	142	142	140	124	6.26	102	3.99	4.8	70	2	1	1	6	4919.96
85.8	1	1	78	78	84	NA	152	144	144	NA	194	11.42	101.2	4.46	6.6	70	1	1	1	12	3082.72
92.2	1	1	70	70	60	NA	142	140	160	NA	119	12.88	105.3	4.45	6.2	70	1	1	1	3	4031.77
83.2	1	1	NA	NA	NA	NA	NA	NA	NA	NA	115	23.77	103.9	4	5.9	70	2	1	1	12	5467.83
74.9	2	NA	74	72	72	NA	98	98	96	NA	155	5	100.2	4.33	5.5	71	1	1	2	6	3697.51
68	2	NA	64	60	70	NA	116	118	112	NA	170	5.82	100.6	4.06	3.4	71	2	1	1	4	10535.5
92	2	NA	72	70	68	NA	136	134	124	NA	124	23.79	99.9	4.22	6.2	71	1	1	2	6	7018.75
57.64	2	NA	68	72	70	NA	152	150	140	NA	137	11.23	101	4.4	3.7	71	2	1	1	3	6794.3
56.3	2	NA	NA	54	68	66	NA	150	150	144	209	23.87	102.7	3.35	6.2	71	2	1	1	4	11311.3
93.6	2	NA	NA	84	74	76	NA	164	144	144	148	27.01	107.6	3.58	4.9	71	2	1	1	13	13162.7
79.3	1	1	72	72	72	NA	158	156	152	NA	115	33.06	105.5	4.33	4.7	71	2	1	2	2	6439.57
51.6	1	1	80	70	80	NA	170	174	160	NA	90	2.9	104.9	4.09	3.2	71	1	1	1	3	5786.97
79.3	1	1	70	78	70	NA	188	194	172	NA	77	13.4	95.5	3.69	3.6	71	2	1	1	4	4729.96
82.2	1	2	48	60	NA	50	196	186	NA	190	120	17.75	103.3	4.05	5.8	71	1	1	2	13	3003.02
58.8	2	NA	68	68	66	NA	108	110	108	NA	103	15.66	100.5	4.17	4.1	72	1	1	1	3	4619.19
87.6	2	NA	66	62	62	NA	146	140	134	NA	146	22.68	103	4.13	7.2	72	2	1	2	13	3970.36
90.34	1	1	78	76	76	NA	152	152	146	NA	109	22.56	101.8	4.43	5.5	72	1	1	2	3	8585.18
86.4	1	1	62	64	64	NA	168	168	158	NA	97	17.79	107.6	3.88	3.3	72	2	1	1	3	7087.65
62.7	1	1	70	68	68	NA	180	180	180	NA	89	11.19	103.6	4.81	9.7	72	2	1	1	3	12825.4
74.34	2	NA	74	72	72	NA	106	110	108	NA	132	15.14	100.9	4.62	3.7	73	1	1	2	3	6852.74
64.4	2	NA	74	72	64	NA	126	120	116	NA	166	6.1	102	4.7	4.2	73	1	1	1	4	8563.83
91.4	2	NA	62	64	68	NA	138	134	132	NA	162	18.8	101.5	4.39	6.9	73	2	1	1	4	5013
54.4	2	NA	70	72	70	NA	130	142	138	NA	119	7.56	100.8	4.15	4.8	73	2	1	1	4	10102.7
73.5	2	NA	76	66	54	NA	136	142	136	NA	141	8.26	105.8	4.35	7.7	73	1	1	2	2	6833.91
82.8	2	NA	70	70	68	NA	160	158	160	NA	96	10.44	106.3	3.73	4.6	73	2	1	2	3	6409.05
81.5	1	2	32	30	30	NA	164	164	156	NA	120	11.85	104.5	4.32	5.8	73	2	1	1	3	5132.93
80.7	2	NA	72	74	NA	NA	188	176	NA	NA	127	19.85	102.3	4.19	6.2	73	1	1	2	2	4367.28
62.4	1	1	50	52	54	NA	132	136	134	NA	114	12.99	103.6	3.99	4.8	74	2	1	1	3	9490.46
78.3	2	NA	90	96	90	NA	190	174	180	NA	163	11.98	104.1	3.78	4.3	74	2	1	2	2	7561.95
82.1	1	1	90	88	86	NA	190	194	196	NA	106	6.9	98.5	3.9	4.3	74	2	1	1	4	5359.42
84.9	1	2	50	48	58	NA	148	150	160	NA	122	9.99	97	4.11	6.7	75	1	1	1	13	3156.64
80.5	1	1	100	102	108	NA	160	154	166	NA	116	20.71	97.9	4.13	8.5	75	1	1	1	13	7720.68
81.8	1	1	NA	78	86	78	NA	178	166	164	148	12.69	106.7	4.16	8	75	1	1	1	12	7098.82
52.5	1	1	74	NA	NA	74	214	NA	NA	182	146	5.99	104.5	3.91	3.9	75	2	1	1	4	7643.57
71.5	2	NA	72	70	NA	62	134	130	NA	122	102	15.41	99.5	4.16	5.2	76	1	1	2	5	4169.12
52.6	2	NA	NA	NA	30	0	NA	NA	138	136	174	8.75	102.8	4.12	3.8	76	2	1	1	4	12889.9
63.4	1	1	66	64	70	NA	196	182	172	NA	117	12.11	99.3	3.81	2.9	76	2	1	1	3	6107.4
71.3	2	NA	70	70	72	NA	144	134	140	NA	73	8.37	106.5	3.61	5.1	77	1	1	1	3	5311.25
90.3	1	1	82	80	80	NA	136	132	134	NA	109	43.04	107.4	4.89	7.8	77	1	1	1	3	4031.77
56.54	1	1	68	68	64	NA	144	144	138	NA	88	13.37	104.1	4	3.7	77	2	1	2	3	9333.69
93.6	1	1	76	76	78	NA	148	156	142	NA	149	12.86	96.1	4.48	3	77	1	1	2	6	8374.82
63.7	1	1	90	86	88	NA	180	170	172	NA	125	8.6	106.3	4.19	4.4	77	2	1	2	13	6594.18
72.8	2	NA	NA	NA	82	76	NA	NA	194	184	158	17.26	111.7	4.47	7.7	77	2	1	1	4	6746.72
62.8	2	NA	66	78	78	NA	202	196	192	NA	137	14.22	101.1	4.18	6.6	77	1	1	1	12	4305.26
78.7	1	1	NA	NA	NA	NA	NA	NA	NA	NA	117	7.45	98.9	4.18	7.3	78	1	1	1	10	3946.24
81.2	2	NA	72	74	74	NA	152	148	138	NA	130	19.8	103.7	4.38	8.5	79	1	1	2	13	3840.76
73.9	1	1	90	90	84	NA	160	166	164	NA	101	11.21	105.4	3.97	4.4	79	1	1	1	3	4134.39
68.8	1	1	NA	62	80	66	NA	152	138	142	137	5.71	105.3	3.98	5.6	80	1	1	1	4	4275.73
64.6	2	NA	0	0	NA	0	154	140	NA	146	147	5.28	103.6	4.54	7.1	80	1	1	1	4	4605.81
67.8	2	NA	80	78	72	NA	184	172	162	NA	68	19.14	104.7	4.2	4.4	81	1	1	2	3	4624.69
101.3	1	1	86	84	92	NA	194	184	182	NA	114	8.7	103.7	3.89	5	81	1	1	1	4	7423.9
48.6	2	NA	70	30	20	NA	158	154	160	NA	167	6.93	100.5	2.89	4.8	84	2	1	1	3	6903.15
66.4	2	NA	62	60	60	NA	130	120	124	NA	175	9.16	106.8	3.79	5.5	85	1	1	1	4	4730.52
52.9	1	1	70	70	70	NA	158	164	162	NA	108	25.35	104	4.37	4	85	2	1	1	3	9476.29
44.6	1	1	0	0	NA	NA	198	202	NA	NA	169	11.77	97	4.13	4.3	85	2	1	1	3	6608.12
37.6	NA	NA	58	60	62	NA	84	86	90	NA	73	9.79	103	4.2	5.1	12	2	1	2	25	9139.08
41	NA	NA	66	60	64	NA	88	86	90	NA	90	9.94	108	3.6	2.8	12	1	1	2	17	11930
37.6	NA	NA	60	56	68	NA	94	90	90	NA	89	10.32	102	4.6	3.3	12	2	1	2	16	15247.9
32	NA	NA	48	NA	54	46	94	NA	92	94	86	12	102	3.8	3.8	12	1	1	2	14	17279.7
54.3	NA	NA	50	60	50	NA	100	86	94	NA	131	11.45	100	4	3.5	12	1	1	2	25	8114.04
39.1	NA	NA	48	46	54	NA	94	96	96	NA	84	9.32	103	4	3.3	12	2	1	1	17	7388.85
36.8	NA	NA	70	60	70	NA	96	96	96	NA	110	14.92	100	4	3.3	12	2	1	1	22	10096.2
38.8	NA	NA	44	48	NA	50	96	98	NA	96	66	7.11	106	4.5	4.7	12	1	1	2	26	20111.7
48.1	NA	NA	58	64	66	NA	100	96	94	NA	129	9.06	102	4.2	6.1	12	1	1	2	22	21571.9
55.7	NA	NA	64	64	62	NA	98	94	102	NA	90	14.86	103	4.1	2.8	12	2	1	1	28	6996.64
69.6	NA	NA	66	64	68	NA	96	104	96	NA	87	9.03	102	4.2	4.6	12	2	1	1	28	9591.53
27.5	NA	NA	NA	56	56	56	NA	98	104	98	105	6.86	98	4.3	4	12	1	1	2	27	31544.6
29.2	NA	NA	54	64	50	NA	104	106	90	NA	98	6.49	96	3.6	2.1	12	1	1	1	22	19924.9
33.8	NA	NA	64	70	62	NA	100	96	104	NA	63	10.49	103	4.8	4.4	12	2	1	1	28	6699.78
43.1	NA	NA	70	74	74	NA	102	100	100	NA	100	13.49	109	4.4	3	12	2	1	2	17	7487.49
53.5	NA	NA	60	58	50	NA	98	100	104	NA	116	12.57	101	4.2	5.1	12	1	1	1	17	12164.5
114.3	NA	NA	56	56	60	NA	96	102	104	NA	96	28.18	104	4.2	6.4	12	2	1	2	17	7536.79
46.5	NA	NA	70	60	58	NA	100	104	100	NA	75	12.27	104	4.1	4.5	12	2	1	2	27	14811.3
67.5	NA	NA	40	NA	40	44	110	NA	96	98	68	14.73	107	4	6.9	12	1	1	2	24	31598.7
45.9	NA	NA	60	64	62	NA	102	104	102	NA	76	10.02	101	3.9	4.3	12	2	1	1	17	10055.6
63	NA	NA	50	58	56	NA	102	104	102	NA	107	16.4	100	4	3.9	12	2	1	2	22	19291.1
64.1	NA	NA	62	52	NA	50	98	106	NA	104	90	13.29	103	4.1	5.2	12	2	1	2	23	16412.6
34.8	NA	NA	52	48	50	NA	104	104	102	NA	79	7.54	104	3.9	2.8	12	2	1	1	22	10096.2
35.1	NA	NA	60	60	58	NA	104	106	100	NA	99	7.68	107	4.1	3.6	12	1	1	2	27	31598.7
53.1	NA	NA	60	70	68	NA	104	104	104	NA	219	8.38	99	3.9	5.3	12	1	1	1	22	21615.9
95.4	NA	NA	74	72	70	NA	106	104	104	NA	96	26.77	101	4.3	4.5	12	1	1	1	17	12378.7
35.1	NA	NA	32	48	56	NA	104	108	104	NA	78	10.96	102	4.4	3.9	12	2	1	2	28	6902.83
45.5	NA	NA	NA	68	70	72	NA	108	108	104	65	8.98	102	3.7	3.8	12	2	1	2	19	16971
42.8	NA	NA	58	66	58	NA	112	108	108	NA	99	9.28	101	3.8	2.9	12	1	1	1	28	8665.66
95	NA	NA	56	72	74	NA	108	110	110	NA	65	40.01	104	4.3	5.8	12	2	1	2	23	12977.7
71.5	NA	NA	74	74	78	NA	110	112	108	NA	110	60.61	103	3.9	5.1	12	2	1	1	17	6553.72
64.9	NA	NA	52	46	50	NA	112	110	114	NA	95	31.21	102	4.6	6.2	12	1	1	2	15	11268.7
81.6	NA	NA	52	50	50	NA	110	112	114	NA	95	21.44	105	4.2	6.1	12	2	1	1	19	14429.9
50.8	NA	NA	70	60	60	NA	110	112	116	NA	127	9.85	102	3.9	3.9	12	2	1	1	22	11145.2
79.6	NA	NA	62	68	62	NA	114	112	118	NA	59	16.5	105	4	5.9	12	1	1	2	25	10037.4
45.3	NA	NA	70	72	70	NA	120	114	112	NA	75	8.42	103	4.2	5.6	12	1	1	2	22	21571.9
61.8	NA	NA	0	0	0	NA	120	116	116	NA	99	20.48	103	3.9	6.3	12	1	1	1	15	8680.71
69.3	NA	NA	0	NA	36	0	126	NA	116	114	119	39.72	101	4.3	6.5	12	1	1	2	25	6608.19
58.4	NA	NA	NA	NA	NA	NA	NA	NA	NA	NA	105	19.04	102	4	5.1	12	1	1	2	25	10575.4
51.2	NA	NA	NA	64	62	70	NA	80	80	86	104	8.38	103	4.1	3.2	13	2	1	1	28	9857.31
50.4	NA	NA	58	60	74	NA	88	90	92	NA	88	7.27	103	4.3	5.6	13	1	1	1	15	11417.2
38.8	NA	NA	50	54	58	NA	94	94	96	NA	97	9.61	103	3.6	3.5	13	2	1	1	28	6699.78
49.6	NA	NA	50	56	56	NA	94	96	96	NA	66	10.2	104	4.4	4.5	13	1	1	1	17	13073
31.8	NA	NA	74	54	76	NA	96	96	102	NA	142	9.45	101	4.4	3.1	13	1	1	2	28	7408.64
38.6	NA	NA	NA	NA	46	NA	NA	NA	98	NA	89	8.92	102	4.4	4.5	13	1	1	2	28	15816.9
41.1	NA	NA	66	66	60	NA	96	98	102	NA	65	19.76	102	4	3.4	13	2	1	1	17	7947.06
46.2	NA	NA	60	NA	60	NA	102	NA	96	NA	104	7.55	105	4.7	4.9	13	2	1	2	19	16213.7
58.7	NA	NA	62	66	NA	NA	96	102	NA	NA	96	8.27	105	4.2	3.8	13	2	1	2	17	9925.8
42.4	NA	NA	38	48	54	NA	100	102	96	NA	102	8.37	105	4.4	4.3	13	2	1	2	24	15984.6
49.6	NA	NA	66	74	68	NA	98	100	100	NA	87	9.07	105	3.9	3.4	13	2	1	1	15	12044.2
59.2	NA	NA	70	72	70	NA	102	100	98	NA	113	14.49	107	4.1	5.4	13	2	1	2	24	16873.3
58.4	NA	NA	64	60	54	NA	104	102	96	NA	88	13.38	102	3.9	4.9	13	2	1	1	17	9520
42.2	NA	NA	48	46	42	NA	106	100	100	NA	128	9.21	104	3.7	4.6	13	1	1	1	25	9185.52
56	NA	NA	58	56	50	NA	106	102	98	NA	91	14.71	106	4	3.7	13	2	1	1	25	9861.9
43.9	NA	NA	64	60	60	NA	100	104	104	NA	83	8.22	97	3.5	3.7	13	2	1	1	22	9524.42
50.3	NA	NA	NA	60	58	48	NA	106	104	98	68	6.62	104	4.4	5.2	13	1	1	2	25	6824.01
53.2	NA	NA	56	NA	52	50	102	NA	102	104	64	12.66	102	3.7	5.1	13	2	1	2	25	8892.66
49	NA	NA	64	66	64	NA	110	106	100	NA	60	12.73	102	3.7	2.9	13	2	1	1	15	9477.44
59	NA	NA	68	66	68	NA	106	106	104	NA	40	11.26	108	3.8	3.6	13	2	1	2	17	10164.2
58.9	NA	NA	64	66	NA	64	106	104	NA	108	88	9.93	100	3.5	5.7	13	1	1	2	19	30511
84.3	NA	NA	0	40	30	NA	102	112	110	NA	121	21.04	105	4.2	6.7	13	1	1	2	23	17944.2
82.7	NA	NA	60	56	48	NA	114	108	106	NA	89	37.77	100	4.1	7.9	13	1	1	2	27	28405.6
84.1	NA	NA	42	40	48	NA	110	114	104	NA	190	22.02	99	4	6.9	13	2	1	1	22	9947
55.4	NA	NA	72	76	80	NA	114	110	114	NA	79	12.89	101	4.5	4	13	2	1	1	22	11366.9
50.4	NA	NA	66	76	80	NA	114	114	112	NA	75	9.15	105	4.1	4.8	13	2	1	2	27	14057.8
50.6	NA	NA	66	66	62	NA	116	112	112	NA	98	7.42	107	3.9	3.5	13	2	1	1	15	8222.6
69.3	NA	NA	42	48	50	NA	112	116	112	NA	93	18.56	99	4.1	5.6	13	1	1	2	25	9251.47
85.8	NA	NA	66	60	64	NA	114	114	112	NA	95	20.04	105	3.9	5.9	13	2	1	2	19	16562.5
63.9	NA	NA	54	66	74	NA	114	112	116	NA	98	15.76	102	4.1	3.8	13	2	1	1	28	10307.9
35.1	NA	NA	64	70	66	NA	114	112	118	NA	63	17.74	107	3.8	5.1	13	2	1	2	15	11792.4
57.4	NA	NA	68	66	70	NA	114	110	120	NA	78	9.75	102	4	4.5	13	2	1	2	17	9647.09
54.2	NA	NA	56	NA	56	50	118	NA	116	114	85	5.8	100	4.1	7	13	1	1	2	19	28722.3
80.2	NA	NA	62	64	70	NA	126	124	122	NA	123	27.45	103	4	4.4	13	2	1	1	25	14361.2
67.5	NA	NA	60	60	54	NA	92	84	86	NA	80	18.49	106	4.1	6.4	14	1	1	2	17	12598
56.8	NA	NA	54	52	56	NA	90	86	94	NA	93	5.57	104	3.9	5.3	14	2	1	2	24	16367.1
39.9	NA	NA	64	62	74	NA	96	90	94	NA	67	13.68	100	5	4	14	1	1	1	28	12608.9
59	NA	NA	60	NA	NA	58	100	NA	NA	100	81	20.31	107	3.9	5	14	2	1	2	26	10874.6
54.3	NA	NA	66	64	70	NA	104	104	96	NA	92	7.56	106	4.2	4.5	14	2	1	2	27	14802.8
48	NA	NA	54	58	NA	62	100	104	NA	102	90	7.14	105	4	3.4	14	2	1	1	28	9857.31
48.9	NA	NA	NA	68	72	70	NA	104	102	100	57	16.11	105	3.4	4.1	14	2	1	1	15	11411.9
52.4	NA	NA	60	56	NA	42	104	102	NA	100	102	25.95	101	3.9	3.6	14	1	1	2	28	7772.98
56.5	NA	NA	76	70	68	NA	100	102	106	NA	96	16.8	105	4.1	3.9	14	2	1	2	15	12032.3
58.2	NA	NA	64	62	NA	70	102	98	NA	108	104	12.91	100	4.3	5	14	2	1	2	25	9534.62
77.8	NA	NA	50	50	50	NA	108	106	94	NA	77	12.04	103	4.8	7	14	1	1	2	17	9244.17
46.8	NA	NA	60	72	66	NA	106	106	98	NA	110	8.42	100	3.8	4.7	14	2	1	1	22	9643.99
55.5	NA	NA	40	46	48	NA	106	100	104	NA	102	12.83	102	4	5.6	14	2	1	1	15	12044.2
61.9	NA	NA	46	NA	50	48	104	NA	102	104	128	15.24	103	4	4.4	14	2	1	1	15	11767.2
80	NA	NA	58	54	58	NA	104	100	106	NA	80	22.12	105	4.2	4.2	14	1	1	2	28	6849.34
56.8	NA	NA	52	52	50	NA	102	108	102	NA	55	11.98	104	3.9	5	14	2	1	1	26	14467.4
60	NA	NA	64	70	58	NA	110	104	98	NA	108	10.84	101	4.2	5.3	14	2	1	1	17	7077.34
46.6	NA	NA	60	NA	NA	NA	106	NA	NA	NA	77	13.4	102	4.1	4.4	14	2	1	1	28	9092.82
49.5	NA	NA	74	72	72	NA	106	104	110	NA	61	12.59	104	3.9	3.4	14	2	1	1	15	8915.52
87	NA	NA	54	50	50	NA	106	110	104	NA	84	16.98	99	4.2	3.6	14	2	1	1	22	10908
72.5	NA	NA	56	50	52	NA	114	106	106	NA	94	8.11	100	3.8	5.6	14	1	1	1	22	21615.9
43.9	NA	NA	74	NA	78	NA	110	NA	112	NA	91	8.63	104	4.1	3	14	2	1	1	28	8510.12
84.4	NA	NA	68	66	NA	68	116	108	NA	112	104	20.6	101	4.2	5.9	14	1	1	2	28	8343.08
69.5	NA	NA	68	74	72	NA	118	110	110	NA	99	21.58	101	3.9	6.4	14	2	1	2	28	7704.79
54.3	NA	NA	58	52	56	NA	114	114	112	NA	82	9.39	100	4.5	5.7	14	1	1	2	17	11523.6
58.6	NA	NA	68	62	56	NA	114	112	114	NA	46	9.23	102	4.3	3.3	14	1	1	2	28	11646
64.6	NA	NA	NA	74	84	80	NA	112	112	116	87	6.79	103	3.6	6	14	1	1	2	24	17964.3
66.7	NA	NA	50	44	44	NA	116	114	114	NA	97	16.98	101	4.1	5.1	14	2	1	1	22	10959.1
75.2	NA	NA	NA	76	56	52	NA	118	114	112	86	16.07	102	3.8	5.3	14	1	1	2	25	7739.64
91.9	NA	NA	54	44	56	NA	114	116	114	NA	71	13.28	102	3.5	7.7	14	1	1	2	27	29885.7
43.6	NA	NA	66	64	60	NA	112	124	110	NA	74	8.07	105	3.9	4.8	14	1	1	1	15	11417.2
47.3	NA	NA	60	62	NA	NA	116	116	NA	NA	83	8.31	102	4	4.3	14	1	1	1	25	7861.17
53.7	NA	NA	70	74	74	NA	118	118	114	NA	140	10.94	103	4.5	5.7	14	1	1	2	22	22322.4
56.7	NA	NA	60	62	70	NA	114	122	120	NA	71	11.06	102	4.3	5.6	14	1	1	1	17	8252.46
100.1	NA	NA	56	58	60	NA	112	124	120	NA	109	15.18	105	3.9	5.5	14	2	1	2	23	15996.6
63.2	NA	NA	70	60	NA	68	122	124	NA	116	115	15.8	103	4.1	5.4	14	2	1	1	15	8930.83
80.8	NA	NA	60	58	60	NA	128	118	118	NA	136	22.93	102	4.3	6.3	14	1	1	1	17	8125.86
59.8	NA	NA	NA	NA	NA	NA	NA	NA	NA	NA	79	15.2	98	4.1	4.2	14	1	1	2	25	11016.3
49.6	NA	NA	64	64	64	NA	80	80	78	NA	95	11.85	105	4.1	2.8	15	2	1	2	17	7793.88
64.6	NA	NA	54	52	54	NA	96	88	90	NA	52	8.45	103	4.6	4.2	15	2	1	1	17	9520
63.8	NA	NA	52	56	52	NA	96	94	88	NA	95	10.02	102	3.9	4	15	2	1	1	22	12494.5
71.6	NA	NA	64	56	64	NA	94	94	92	NA	135	12.35	103	3.9	5.4	15	1	1	2	22	22284.2
55.5	NA	NA	70	72	NA	68	102	98	NA	96	78	7.82	103	4.4	6.5	15	1	1	1	25	11411.8
63.4	NA	NA	56	52	58	NA	100	102	100	NA	89	10.8	103	3.4	5.3	15	1	1	2	25	9251.47
57.5	NA	NA	66	72	68	NA	100	104	100	NA	119	11.38	103	4.3	4.6	15	2	1	2	17	12318.3
71.5	NA	NA	72	72	74	NA	102	100	104	NA	93	15	103	4.3	6.9	15	2	1	2	19	16562.5
74.2	NA	NA	60	64	66	NA	102	104	100	NA	81	12.24	100	4.2	4.6	15	1	1	1	17	14195.8
63.9	NA	NA	70	74	74	NA	104	96	110	NA	102	9.38	105	4.2	5.4	15	1	1	2	22	21571.9
67.1	NA	NA	58	64	64	NA	104	106	102	NA	78	15.42	107	4.2	3.4	15	2	1	1	22	11687.9
52.8	NA	NA	54	58	58	NA	104	106	106	NA	63	10	103	4.3	3.4	15	2	1	2	15	11632.6
56.1	NA	NA	52	64	50	NA	106	106	106	NA	154	10.13	100	4.1	5.1	15	2	1	2	25	6405.03
52.4	NA	NA	72	74	78	NA	104	106	110	NA	108	22.13	105	4	5.2	15	2	1	2	15	11722.5
49.2	NA	NA	64	72	NA	74	106	106	NA	110	94	12.12	102	4.1	3.7	15	2	1	2	28	6743.9
60.4	NA	NA	54	46	50	NA	110	102	110	NA	89	5.07	105	4.1	4.5	15	1	1	1	15	16053.5
78.1	NA	NA	54	50	56	NA	108	108	106	NA	81	10.66	106	4.2	4.7	15	2	1	1	15	15801.7
44.2	NA	NA	NA	76	NA	NA	NA	108	NA	NA	86	10.78	103	4.1	3.8	15	2	1	2	17	10580.5
52.1	NA	NA	52	54	64	NA	108	110	110	NA	74	7.78	105	4.3	5.4	15	1	1	2	17	13139.3
47.1	NA	NA	78	70	72	NA	116	110	106	NA	64	6.7	107	4.4	3.4	15	2	1	2	22	18703.7
59.1	NA	NA	66	74	72	NA	112	112	108	NA	31	8.41	105	4.3	5.8	15	1	1	2	19	19442.3
80.4	NA	NA	NA	74	76	72	NA	112	112	110	117	22.75	104	4.2	5.8	15	2	1	2	28	8510.12
53.6	NA	NA	68	66	62	NA	114	108	114	NA	87	8.38	104	3.9	3.5	15	1	1	2	28	7415.61
74.9	NA	NA	56	60	66	NA	114	110	114	NA	99	12.71	99	4	6.4	15	1	1	1	22	20519.6
47.1	NA	NA	64	70	64	NA	114	114	114	NA	83	12.11	102	4	3	15	2	1	1	17	7434.05
65.3	NA	NA	62	52	50	NA	114	114	114	NA	83	12.07	104	4.1	4.5	15	2	1	2	19	16213.7
62.6	NA	NA	70	68	60	NA	118	114	116	NA	125	22.74	99	4.5	7.3	15	1	1	1	17	8984.87
50.8	NA	NA	68	74	66	NA	120	118	116	NA	70	9.18	101	4.2	4.4	15	1	1	1	28	8398.02
78.1	NA	NA	62	54	NA	68	116	124	NA	124	74	10.84	101	4.1	7.3	15	1	1	2	26	21790.7
57.4	NA	NA	58	52	52	NA	132	124	126	NA	100	10.91	101	4	4.4	15	2	1	2	28	8053.01
87.6	NA	NA	NA	46	52	42	NA	136	130	126	134	37.95	101	3.8	7.2	15	1	1	1	25	7084.2
82.3	NA	NA	60	52	70	NA	132	136	134	NA	129	15.58	102	5.5	5	15	1	1	1	17	8125.86
55	2	NA	52	46	58	NA	96	92	92	NA	82	6.76	103	3.7	3	16	2	1	2	23	15519.8
60.6	2	NA	60	64	60	NA	96	96	96	NA	83	6.87	100	3.9	3.8	16	2	1	1	22	8435.93
44.9	2	NA	58	60	66	NA	90	102	102	NA	73	15.43	105	4.2	2.7	16	2	1	1	28	6932.18
62.5	2	NA	50	50	60	NA	96	98	100	NA	99	8.57	102	4.1	5.7	16	2	1	1	17	6755.48
63.6	2	NA	56	64	68	NA	94	100	100	NA	80	8.82	102	4.1	3.8	16	2	1	1	17	8454.94
53	NA	NA	56	62	70	NA	100	100	102	NA	87	10.69	107	3.9	4.9	16	2	1	2	15	8671.16
48.2	2	NA	68	78	NA	70	102	104	NA	102	126	8.3	104	3.7	5.1	16	1	1	1	25	7924.44
50.1	2	NA	30	46	42	NA	104	98	106	NA	71	6.49	103	3.9	4.2	16	2	1	1	15	9271.32
90.4	2	NA	64	66	70	NA	106	102	102	NA	79	8.69	103	4.3	6.8	16	1	1	2	17	9045.84
90.7	2	NA	80	70	70	NA	108	98	104	NA	81	17.54	103	4.1	7.1	16	2	1	2	15	9046.61
61.4	2	NA	48	50	66	NA	102	104	106	NA	91	6.8	104	4.2	5.3	16	1	1	2	23	18079.8
61.4	2	NA	NA	68	NA	60	NA	110	NA	104	94	8.04	104	3.9	3.9	16	2	1	1	15	8676.41
68.3	2	NA	70	70	60	NA	104	110	108	NA	73	19.01	104	4	6.8	16	2	1	2	23	13254.4
63.9	2	NA	70	72	74	NA	104	110	110	NA	64	6.69	100	4.6	4.2	16	1	1	1	28	8203.11
63.2	2	NA	66	60	68	NA	104	114	110	NA	74	3.04	103	3.7	6.9	16	1	1	2	24	14057.4
84.1	2	NA	70	64	62	NA	114	106	110	NA	65	28.67	104	3.9	7	16	1	1	2	27	16944.7
54.2	NA	NA	60	62	56	NA	114	112	106	NA	90	28.7	103	3.7	3.2	16	2	1	1	22	9891.56
62.2	2	NA	58	74	64	NA	112	112	108	NA	77	11.47	105	3.9	3.5	16	2	1	2	19	15536.6
56.8	2	NA	80	76	76	NA	108	110	116	NA	107	15.9	72	2.8	4.5	16	1	1	1	17	8590.34
60.6	2	NA	56	56	48	NA	108	110	116	NA	134	24.88	102	4	4.3	16	2	1	2	25	6671.79
65.6	2	NA	NA	72	72	74	NA	114	112	108	54	11.15	104	4.4	5.2	16	1	1	2	28	9503.26
56.1	2	NA	60	60	54	NA	114	112	110	NA	65	4.79	102	3.7	6	16	1	1	2	15	12102.5
56	2	NA	60	64	66	NA	112	112	114	NA	61	13.75	103	4.4	4.7	16	2	1	2	16	12017.4
72.3	2	NA	60	62	60	NA	110	112	116	NA	145	6.62	103	4.8	6.9	16	1	1	1	17	12984
81.1	2	NA	60	60	50	NA	114	118	116	NA	120	16.76	103	3.6	7.7	16	1	1	2	28	7592.43
56.8	2	NA	68	70	66	NA	120	116	116	NA	91	12.13	102	4.1	3.5	16	2	1	1	17	7904.89
54.9	2	NA	76	72	72	NA	114	120	120	NA	111	14.3	103	4.4	4.4	16	2	1	2	22	11004.7
61.2	2	NA	56	52	36	NA	118	120	116	NA	91	17.34	103	4.5	6.3	16	1	1	2	16	14082.1
102.4	2	NA	NA	64	NA	70	NA	124	NA	112	126	36.34	101	4.3	6.2	16	1	1	2	28	8315.8
134.1	2	NA	66	68	NA	NA	122	116	NA	NA	119	14.25	103	3.8	6.6	16	1	1	2	17	9399.43
63.1	2	NA	60	64	66	NA	126	114	120	NA	107	28.59	99	4.6	6.1	16	1	1	2	17	12777.9
68.6	2	NA	68	66	72	NA	120	116	124	NA	123	9.36	104	4.4	5.7	16	1	1	2	24	20094.5
52.5	2	NA	58	NA	50	64	122	NA	116	128	99	8.16	99	3.5	4.6	16	1	1	2	25	8489.38
88.1	2	NA	66	60	NA	NA	122	122	NA	NA	101	23.13	101	4.3	6.6	16	1	1	2	25	7039.97
54.3	2	NA	80	74	76	NA	136	124	124	NA	72	13.14	103	4.2	5.6	16	1	1	1	17	8590.34
62	2	NA	NA	NA	NA	NA	NA	NA	NA	NA	74	5.61	103	3.7	4.4	16	1	1	1	15	12542.7
73.9	1	1	50	50	58	NA	100	98	100	NA	69	16.29	101	4	4.3	16	2	1	1	17	7465.5
47.1	2	NA	56	56	54	NA	94	92	92	NA	73	6.66	102	4	3.5	17	2	1	1	15	8160.52
47.6	2	NA	54	50	52	NA	96	94	90	NA	79	9.23	107	3.9	4.3	17	2	1	2	17	7592.07
49.7	2	NA	58	68	66	NA	96	96	90	NA	76	6.41	107	4	4.1	17	2	1	2	17	7592.07
71.4	2	NA	42	40	40	NA	98	96	94	NA	78	20.25	102	4	5.1	17	2	1	1	22	10453.7
59.9	2	NA	56	56	64	NA	96	96	98	NA	92	8.97	102	4.2	4.1	17	2	1	1	26	12718.7
70	NA	NA	54	42	56	NA	98	98	94	NA	115	5.55	103	3.7	6.8	17	1	1	1	25	9278.03
48	2	NA	60	58	NA	NA	100	96	NA	NA	58	12.37	103	4.3	4.9	17	2	1	1	28	6847.24
54.3	2	NA	60	66	64	NA	100	98	96	NA	70	14.81	105	3.6	4.2	17	2	1	2	24	14710.8
69.8	2	NA	52	70	NA	52	108	98	NA	102	60	4.42	98	4	6.8	17	1	1	2	19	17666.5
46.5	NA	NA	64	58	58	NA	106	104	100	NA	70	10.35	106	4.8	3.7	17	2	1	1	17	7042.51
80.1	2	NA	70	74	70	NA	106	104	104	NA	37	12.38	105	4.6	2.7	17	2	1	1	17	8454.94
75.6	2	NA	56	60	NA	NA	104	106	NA	NA	74	21.97	101	4.1	4.8	17	2	1	1	28	6847.24
81	2	NA	70	48	50	NA	110	104	104	NA	69	12.79	103	4	3.6	17	2	1	1	17	6972.02
35.4	2	NA	64	60	70	NA	104	106	110	NA	84	6.22	104	4.1	4.7	17	2	1	2	27	14219.7
50.9	2	NA	74	68	56	NA	106	104	112	NA	64	8.06	102	4.3	4.9	17	2	1	2	17	7222.05
63.2	2	NA	70	72	74	NA	110	100	112	NA	32	10.51	103	3.6	5.2	17	2	1	2	23	16736.5
81.1	2	NA	70	64	70	NA	104	112	106	NA	52	8.5	108	4.1	5.9	17	1	1	2	27	16452.8
60.8	2	NA	54	NA	52	52	114	NA	104	108	88	11.55	104	3.9	4.1	17	2	1	2	28	8009.79
67	2	NA	70	74	68	NA	114	106	106	NA	81	6.84	102	4.3	5.7	17	1	1	2	24	14057.4
62.1	2	NA	64	66	72	NA	108	110	112	NA	111	20.74	101	4.5	6.6	17	1	1	1	18	15432.5
65.6	NA	NA	72	64	68	NA	114	110	106	NA	33	6.81	101	3.7	5.5	17	1	1	2	22	17858
69.5	2	NA	48	48	58	NA	106	114	110	NA	84	10.96	106	4	5.3	17	2	1	1	25	8146.24
52.3	2	NA	NA	44	50	56	NA	112	114	106	103	14.32	101	3.8	5.9	17	1	1	1	18	12930.1
56.7	2	NA	62	NA	52	56	106	NA	114	112	64	18.51	101	4.1	4.4	17	2	1	2	28	6677.87
61.2	2	NA	76	82	74	NA	114	114	106	NA	84	9.78	99	4.3	3.9	17	1	1	1	15	15931.3
94.4	2	NA	56	30	56	NA	116	102	116	NA	95	17.35	102	3.8	6.6	17	1	1	2	17	8809.26
65.1	2	NA	50	56	56	NA	112	110	116	NA	100	11.4	106	3.7	3.5	17	2	1	2	28	6380.65
83.8	2	NA	58	60	60	NA	110	116	112	NA	79	10.79	99	4	4.5	17	1	1	1	22	12516.2
62.1	2	NA	NA	58	62	56	NA	118	110	112	80	7.15	102	4.2	5.6	17	1	1	1	15	12063
46.7	2	NA	70	68	70	NA	112	118	116	NA	83	8.6	96	4	2.9	17	2	1	1	22	9680.35
78.5	2	NA	74	66	78	NA	118	112	118	NA	83	7.07	102	3.5	6.4	17	1	1	2	19	16824.8
80.9	2	NA	66	66	74	NA	116	120	112	NA	91	8.77	102	3.8	4	17	2	1	1	28	4149.74
98.3	2	NA	52	50	NA	36	118	114	NA	120	110	26.87	107	4	7.2	17	1	1	2	16	13120.5
55.5	2	NA	56	52	50	NA	124	120	124	NA	66	7.55	101	3.6	5.7	17	1	1	1	28	9247.82
86.6	2	NA	58	52	52	NA	128	124	116	NA	138	19.23	101	4.4	7.7	17	1	1	2	24	14100.7
64.3	2	NA	NA	52	50	48	NA	120	126	124	117	12.82	102	3.8	5.5	17	2	1	2	25	7946.32
72.1	2	NA	80	80	78	NA	124	130	126	NA	56	6.47	104	3.8	6	17	1	1	1	25	9294.85
49.4	1	2	52	52	56	NA	104	104	96	NA	81	7.32	104	3.8	4	17	2	1	2	24	10358.2
53.4	2	NA	70	NA	56	60	90	NA	94	88	76	9.2	101	3.7	3.8	18	2	1	2	28	7048.59
47.1	2	NA	68	70	72	NA	92	96	92	NA	98	8.97	102	3.8	3.3	18	2	1	2	15	8603.8
52.4	2	NA	62	66	60	NA	94	94	100	NA	61	5.85	103	4	4.6	18	2	1	2	24	10323
48.9	2	NA	60	58	64	NA	94	102	94	NA	86	8.12	101	4.5	3.8	18	2	1	1	17	8418.1
46	2	NA	50	52	NA	NA	100	98	NA	NA	82	6.24	100	4	5.8	18	1	1	2	25	8353.11
63.1	2	NA	74	76	70	NA	102	102	94	NA	73	11.91	103	4.8	4.4	18	1	1	2	17	8794.16
48.1	2	NA	58	60	58	NA	98	102	102	NA	113	10.5	104	4.2	4.1	18	2	1	2	17	12147.3
51.8	2	NA	58	NA	50	52	106	NA	98	98	100	9.79	104	3.9	4.6	18	2	1	1	15	8578.63
58.1	2	NA	60	74	68	NA	98	104	102	NA	122	10.8	106	4.1	4.7	18	2	1	2	27	13615.1
53.9	2	NA	70	76	80	NA	104	104	102	NA	89	10.49	102	4.1	3.6	18	2	1	2	15	8603.8
54.5	2	NA	60	70	68	NA	104	104	104	NA	60	10.27	104	4	3.9	18	2	1	2	24	17664.9
55.6	2	NA	62	62	66	NA	102	106	104	NA	122	18.18	104	4.1	4.4	18	2	1	2	19	16295
71.1	2	NA	60	58	66	NA	104	106	104	NA	66	17.92	106	3.8	4.9	18	2	1	1	25	8915.52
61	2	NA	58	60	60	NA	106	106	104	NA	108	7.36	102	4	4.1	18	2	1	1	17	7330.85
65.3	2	NA	64	56	58	NA	108	106	102	NA	125	6.59	101	3.8	6.1	18	1	1	2	19	17942.5
93.4	2	NA	80	80	80	NA	104	106	106	NA	74	36.73	104	4	6.5	18	2	1	2	15	8651.1
37.6	2	NA	NA	64	68	70	NA	102	106	110	91	11.74	104	3.9	4.2	18	2	1	2	17	7014.21
45.6	2	NA	NA	64	60	60	NA	104	104	110	99	12.03	104	4.2	4.5	18	2	1	2	28	7394.29
88	2	NA	76	70	70	NA	106	106	106	NA	96	15.8	100	3.9	7.4	18	1	1	1	22	13372.9
56.5	2	NA	68	70	70	NA	112	102	106	NA	54	9.9	103	3.9	3.1	18	2	1	2	23	16341.1
65.8	2	NA	56	50	48	NA	102	110	110	NA	131	11.46	104	3.8	3.8	18	2	1	1	15	8614.22
68.8	2	NA	42	46	44	NA	106	112	104	NA	156	9.91	107	4	3.2	18	2	1	1	28	7033.99
58.7	NA	NA	NA	54	54	NA	NA	110	106	NA	106	9.83	103	4.9	5.1	18	1	1	2	16	14852.9
69	2	NA	66	74	64	NA	104	106	114	NA	110	12.79	99	4.2	4.9	18	2	1	1	22	12054.7
74.2	2	NA	68	64	68	NA	114	106	104	NA	113	11.84	97	3.7	3.9	18	2	1	1	15	9672.84
80.1	2	NA	60	62	56	NA	110	108	108	NA	108	12.21	100	4.4	5.7	18	1	1	2	17	7950.84
66	NA	NA	42	NA	48	36	112	NA	110	106	83	8.79	102	3.9	5.2	18	1	1	2	28	8273.09
77.6	2	NA	60	70	68	NA	110	106	114	NA	169	21.35	102	4.4	4.5	18	2	1	2	15	8636.27
84.1	2	NA	60	58	NA	NA	110	110	NA	NA	120	12.07	99	4.3	5.9	18	1	1	1	15	11877.4
53.8	2	NA	58	48	NA	48	114	112	NA	106	87	9.47	100	3.9	3.8	18	2	1	1	15	10217.1
73	2	NA	60	58	58	NA	114	110	108	NA	99	10.51	100	3.7	5.2	18	1	1	1	17	8380.22
68.7	2	NA	54	54	52	NA	110	114	112	NA	57	12.99	101	3.9	5.3	18	1	1	2	15	11200.2
90.9	2	NA	56	58	64	NA	106	116	114	NA	108	11.4	102	4	6	18	2	1	2	25	6932.3
100	2	NA	62	56	58	NA	110	116	110	NA	97	17.82	104	3.9	4.9	18	2	1	2	25	9084.06
81.5	2	NA	62	50	50	NA	108	116	114	NA	113	16.58	97	4.3	6.4	18	1	1	1	17	8590.34
75.6	2	NA	62	72	80	NA	114	110	116	NA	132	7.08	100	4.5	7.7	18	1	1	2	24	17458.9
58.3	2	NA	NA	54	54	56	NA	116	112	114	79	8.45	103	3.6	5.2	18	2	1	1	15	10217.1
80.3	2	NA	64	70	66	NA	114	114	116	NA	123	16.52	99	3.6	7.5	18	1	1	2	28	7592.43
68.7	NA	NA	70	74	70	NA	110	120	116	NA	104	26.78	104	4.1	2.7	18	2	1	2	15	8683.81
68.9	2	NA	74	78	76	NA	116	116	120	NA	103	12.22	99	4.8	4.6	18	1	1	1	17	8172.63
56.2	2	NA	40	NA	34	40	120	NA	118	120	71	6.42	100	4.5	6	18	1	1	2	25	7589.4
51.1	2	NA	62	54	64	NA	128	118	114	NA	99	10.17	102	3.5	4.6	18	1	1	2	25	9216.85
95.3	2	NA	66	58	56	NA	120	122	122	NA	71	29.6	101	4.2	7.7	18	1	1	2	19	17180.4
88.7	2	NA	60	60	60	NA	124	122	120	NA	86	49.03	102	3.8	5.4	18	1	1	2	17	8964.46
171.5	2	NA	70	70	74	NA	126	128	126	NA	153	65.9	105	4	7.3	18	1	1	2	17	8321.26
95.9	1	2	NA	72	84	80	NA	124	118	116	124	23.23	103	4.2	6.1	18	1	1	1	15	9373.03
52.3	2	NA	58	52	48	NA	100	94	88	NA	70	12.12	106	3.5	4	19	2	1	1	17	7366.78
52.8	NA	NA	60	52	NA	62	96	94	NA	94	86	7.06	101	4.3	3.5	19	1	1	2	28	7894.41
42.6	2	NA	62	56	60	NA	100	102	100	NA	80	13.1	105	3.8	3.4	19	2	1	1	28	8381.59
54.3	2	NA	58	54	50	NA	98	102	106	NA	159	14.16	105	3.7	3.9	19	2	1	2	23	14396.3
58.9	2	NA	58	54	54	NA	112	100	100	NA	126	8.63	100	3.9	5.4	19	2	1	1	22	12379.3
52	9	NA	58	56	66	NA	108	108	104	NA	67	7.43	106	3.5	3.7	19	2	1	2	23	15082.2
62.6	2	NA	62	66	NA	64	110	104	NA	108	122	9.57	102	3.6	5.3	19	2	1	1	15	8578.63
82	NA	NA	64	54	60	NA	104	108	110	NA	94	10.18	99	4	4.4	19	2	1	1	17	6920.64
82.2	2	NA	64	NA	50	NA	112	NA	104	NA	87	26.49	106	3.9	5.5	19	2	1	1	15	8126.71
49.6	2	NA	72	NA	NA	68	106	NA	NA	112	89	10.52	105	3.4	3.1	19	2	1	1	25	14959.4
78.1	2	NA	66	62	62	NA	112	116	108	NA	87	16.67	103	3.7	3.9	19	2	1	2	19	15536.6
52.9	NA	NA	62	60	62	NA	118	110	112	NA	75	5	105	3.8	5.7	19	1	1	2	21	12152.2
61.5	2	NA	62	54	56	NA	116	114	112	NA	119	13.44	102	3.6	5.5	19	1	1	1	25	9352.03
62.4	NA	NA	NA	54	54	NA	NA	114	116	NA	95	19.2	101	3.7	4.7	19	1	1	2	16	13658.7
81.6	2	NA	44	48	50	NA	120	112	114	NA	116	10.04	99	3.6	6.5	19	1	1	2	19	17666.5
62.7	2	NA	80	70	80	NA	120	116	114	NA	86	9.65	104	3.7	5.3	19	1	1	1	17	7936.49
63.7	2	NA	54	58	NA	60	118	116	NA	122	107	6.13	101	3.8	7.3	19	1	1	2	19	18713.5
80	2	NA	56	60	54	NA	120	120	120	NA	86	27.7	102	3.8	6.7	19	1	1	2	15	11196.3
93.7	2	NA	70	78	84	NA	116	120	126	NA	84	13.41	104	4	7.4	19	1	1	2	24	16944.7
76.5	2	NA	54	60	66	NA	126	118	120	NA	91	10.47	101	3.9	5.3	19	1	1	1	22	12758.5
79	2	NA	74	60	64	NA	124	120	122	NA	129	8.34	100	4.2	7.5	19	1	1	1	22	15055.3
75.4	2	NA	74	64	70	NA	126	124	118	NA	93	11.43	101	4.1	5.1	19	1	1	1	17	7756.32
116.5	2	NA	80	72	80	NA	124	120	126	NA	167	32.89	105	4	8.9	19	1	1	2	15	9603.5
75.2	NA	NA	NA	62	NA	66	NA	128	NA	124	55	11.14	99	4.2	7.3	19	1	1	2	19	16729.7
137.9	2	NA	70	80	74	NA	140	130	128	NA	111	44.65	103	3.9	7.7	19	1	1	1	17	9328.16
56.2	2	NA	NA	NA	NA	NA	NA	NA	NA	NA	101	5.94	99	3.8	6.4	19	1	1	2	25	8489.38
57.6	2	NA	NA	NA	NA	NA	NA	NA	NA	NA	78	6.83	104	4	4.4	19	2	1	1	28	7975.82
71.2	2	NA	64	NA	72	64	90	NA	100	92	124	10.66	104	4.1	5.2	20	2	1	2	25	34880
47.5	2	NA	56	54	NA	NA	96	104	NA	NA	93	3.38	104	3.5	3.7	20	2	1	1	25	35399.3
58.4	2	NA	64	56	58	NA	102	104	94	NA	85	8.76	103	3.9	2.7	20	2	1	2	27	75170.7
50	2	NA	68	74	70	NA	104	98	104	NA	95	7.07	105	4	2.6	20	2	1	1	15	41970.2
52	2	NA	52	42	38	NA	106	104	102	NA	96	6.28	101	3.8	3.2	20	2	1	1	18	47850
50.5	2	NA	54	54	50	NA	110	102	102	NA	62	5.76	105	4.4	6.1	20	1	1	2	22	55996.8
57.2	2	NA	54	56	54	NA	108	106	106	NA	130	6.53	105	3.9	2.4	20	2	1	2	15	6213.16
88.5	2	NA	80	78	70	NA	110	106	104	NA	91	54.72	106	4	6.7	20	2	1	2	27	73935.3
58.2	2	NA	60	56	62	NA	110	110	108	NA	27	5.39	100	3.9	5.7	20	1	1	2	19	61221.3
64.7	2	NA	70	64	66	NA	114	110	106	NA	112	10.55	102	3.9	4.6	20	2	1	1	17	35851.8
65.3	2	NA	72	76	76	NA	110	112	112	NA	98	10.78	98	4.1	5.2	20	1	1	1	22	43597.7
83.5	NA	NA	52	56	NA	62	118	112	NA	116	87	21.75	99	4.1	6.1	20	1	1	2	25	39709.3
48.9	2	NA	72	NA	78	82	112	NA	118	120	81	14.29	105	3.6	3.6	20	2	1	1	25	40565.4
74.2	NA	NA	56	58	64	NA	124	122	122	NA	167	24.22	98	3.5	6.5	20	1	1	1	18	50070.3
75.7	NA	NA	70	76	80	NA	128	122	120	NA	77	5.96	103	4.3	7	20	1	1	2	19	62734.4
76.4	2	NA	66	68	66	NA	126	118	130	NA	170	11.04	106	3.4	5.4	20	1	1	2	17	38779
84.1	2	NA	62	64	64	NA	130	124	134	NA	96	7.62	100	3.7	7.1	20	1	1	1	28	37855.9
87.3	2	NA	54	58	60	NA	90	96	90	NA	151	34.19	100	4.1	3.3	21	2	1	2	20	18018.7
79.4	2	NA	52	46	40	NA	106	92	104	NA	186	9.59	106	3.9	4.7	21	2	1	2	22	12839.7
78.6	2	NA	62	NA	NA	70	106	NA	NA	106	94	20.89	104	4.6	5.8	21	2	1	1	25	40565.4
69.6	2	NA	54	52	50	NA	108	106	108	NA	52	10.28	104	4.3	5.7	21	1	1	2	22	45533.8
67.2	2	NA	68	66	68	NA	112	108	106	NA	95	9.96	104	4.2	5.3	21	1	1	2	22	58724.2
59	2	NA	50	42	38	NA	112	114	104	NA	74	6.18	103	3.9	4.9	21	2	1	1	22	49797.3
72.5	2	NA	62	60	NA	NA	112	110	NA	NA	105	18.67	108	4.2	6.3	21	2	1	2	22	54530
72.5	2	NA	64	58	NA	58	112	110	NA	112	123	10.77	103	3.4	3.9	21	2	1	1	28	3358.86
96.1	2	NA	64	64	70	NA	110	112	112	NA	123	24.11	103	3.8	4	21	2	1	2	24	13559.1
50.5	2	NA	66	66	72	NA	114	112	116	NA	80	11.82	102	3.5	3	21	2	1	1	22	48306.7
69.1	2	NA	62	54	52	NA	122	122	120	NA	125	17.3	102	3.3	7	21	1	1	2	25	38301.5
74.8	2	NA	NA	NA	NA	NA	NA	NA	NA	NA	67	12.09	103	3.9	3.7	21	2	1	1	15	43385.5
62.8	2	NA	40	42	50	NA	100	94	80	NA	194	11.43	106	3.8	2.4	22	2	1	2	17	7795.29
72.2	2	NA	NA	48	48	NA	NA	96	98	NA	135	8.92	108	3.8	2.8	22	2	1	2	16	55908.5
57	2	NA	NA	68	70	50	NA	100	102	100	102	6.45	99	3.8	5.3	22	2	1	2	25	33521.1
71.6	2	NA	64	NA	NA	60	104	NA	NA	102	94	21.58	103	4.2	3.9	22	2	1	1	18	47850
65.7	2	NA	60	60	58	NA	104	102	104	NA	79	12.27	107	4.5	3.9	22	2	1	2	15	47860.3
62.4	2	NA	62	62	62	NA	102	106	104	NA	141	4.33	107	4.4	5.1	22	2	1	2	22	9988.06
74.6	2	NA	64	68	60	NA	110	104	110	NA	84	11.52	102	4	3.1	22	2	1	2	24	12656.2
77	2	NA	44	46	42	NA	110	112	112	NA	103	13.28	103	4.3	5.6	22	1	1	2	25	38814.8
53.3	2	NA	62	56	58	NA	122	114	114	NA	166	6.58	102	3.9	7.4	22	1	1	2	15	44300.1
79.6	2	NA	72	74	74	NA	124	118	114	NA	101	19.63	104	4.1	7.8	22	1	1	1	25	43600
76.8	2	NA	60	54	52	NA	126	130	120	NA	129	11.47	104	3.6	5.6	22	1	1	2	17	40258.4
88.8	2	NA	50	54	NA	38	126	128	NA	126	98	20.82	105	3.7	6.4	22	1	1	1	25	41787.3
68.4	2	NA	66	70	72	NA	140	136	128	NA	112	14.76	107	4	6.8	22	1	1	1	15	40096.4
75.3	2	NA	NA	NA	NA	NA	NA	NA	NA	NA	162	6.27	106	4.2	3.3	22	2	1	2	16	57801
100.7	1	1	60	54	62	NA	114	114	110	NA	71	13.26	105	4.1	5	22	2	1	2	22	59972.5
56.5	2	NA	60	58	64	NA	102	100	102	NA	92	12.4	109	4	3	23	2	1	2	17	34124.2
66.7	2	NA	56	58	64	NA	106	104	110	NA	81	11.35	103	3.9	3.6	23	2	1	1	17	35851.8
52.7	2	NA	58	66	70	NA	108	112	102	NA	137	5.99	102	4.2	3.6	23	2	1	1	22	44144.2
70.1	2	NA	76	78	66	NA	106	112	106	NA	62	7.72	101	4.2	4	23	1	1	1	15	36578.3
78.8	2	NA	NA	78	72	78	NA	114	106	110	113	11.67	102	4	5.3	23	1	1	2	25	39492.1
58.4	2	NA	62	66	68	NA	112	114	110	NA	116	7.27	98	3.9	3.2	23	2	1	1	22	48306.7
50.9	2	NA	76	72	76	NA	114	114	114	NA	104	8.71	105	3.8	3.4	23	2	1	2	28	33994.3
74.7	2	NA	74	72	72	NA	116	112	114	NA	156	7.76	100	3.5	2.6	23	2	1	1	17	3708.38
69.3	2	NA	52	54	58	NA	116	112	118	NA	156	7.83	101	3.6	7.1	23	1	1	1	15	40384.7
67.5	NA	NA	74	72	72	NA	118	120	114	NA	97	11.54	98	4.8	8.1	23	1	1	2	19	64138.1
66.6	2	NA	52	54	52	NA	84	90	88	NA	132	7.63	107	3.8	3.2	24	2	1	1	25	8674.43
50.7	2	NA	60	58	54	NA	96	92	92	NA	97	7.5	99	4.5	3.5	24	2	1	2	19	68719.2
63.2	NA	NA	72	64	68	NA	110	96	90	NA	84	9.2	102	4.1	3.4	24	2	1	2	20	59983.6
70	2	NA	52	NA	56	NA	106	NA	104	NA	105	11.44	104	3.9	4.7	24	2	1	2	25	39864.4
66.6	2	NA	72	70	72	NA	110	106	106	NA	130	11.04	100	4	6	24	1	1	2	27	63189.3
69.1	NA	NA	62	66	64	NA	110	106	106	NA	72	10.46	101	4.2	6.8	24	1	1	2	15	42824.6
66.4	2	NA	56	54	NA	60	110	110	NA	108	82	5.52	102	4.1	7.6	24	1	1	1	25	36148.5
114.9	2	NA	68	NA	72	72	110	NA	110	112	96	7.16	105	3.7	7.6	24	1	1	1	19	65471.6
66.6	2	NA	80	74	76	NA	110	114	112	NA	89	10.84	102	4.8	7.8	24	1	1	2	22	55996.8
76.9	2	NA	NA	22	0	0	NA	112	114	116	165	16.55	104	4	3	24	2	1	2	25	4869.26
94.8	2	NA	66	66	78	NA	118	116	112	NA	113	12.79	103	4.2	8.1	24	1	1	1	15	36578.3
87.1	2	NA	74	76	80	NA	120	120	120	NA	121	6.14	100	3.9	6.4	24	2	1	1	17	44454.3
101.9	2	NA	78	78	78	NA	116	124	122	NA	106	12.34	102	3.9	6.6	24	1	1	1	17	33925.1
67.4	2	NA	NA	74	66	74	NA	134	130	130	107	6.75	101	3.8	5.9	24	1	1	1	15	40096.4
65.6	2	NA	NA	NA	NA	NA	NA	NA	NA	NA	84	9.41	102	4	4.1	24	1	1	1	22	48611.4
65.3	2	NA	54	52	56	NA	100	102	100	NA	100	10.34	100	3.7	3.2	25	2	1	1	17	35851.8
45.7	2	NA	64	66	66	NA	104	100	100	NA	107	3.88	101	3.8	3.8	25	2	1	1	17	37768.2
64.2	2	NA	58	48	58	NA	106	98	100	NA	151	7.07	106	4.1	3.7	25	2	1	1	25	4406.41
84	NA	NA	50	48	42	NA	104	106	102	NA	121	11.78	107	4.1	3.3	25	2	1	2	16	51616.3
69.5	2	NA	46	NA	58	NA	106	NA	110	NA	111	20.62	101	3.9	6.6	25	1	1	2	25	40562.2
64.9	2	NA	68	68	68	NA	110	110	108	NA	84	14.18	108	3.8	5.1	25	2	1	2	23	44738.4
66.3	NA	NA	68	64	64	NA	120	112	114	NA	116	6.24	99	3.9	5.5	25	1	1	1	15	40667.5
95.8	2	NA	72	78	80	NA	110	118	120	NA	88	34.15	99	4.2	4.8	25	1	1	1	17	34781.7
59.4	2	NA	76	78	78	NA	118	116	118	NA	64	10.72	100	3.9	5	25	1	1	2	27	38414
130.2	2	NA	64	72	70	NA	124	122	120	NA	154	18.67	104	4	6.8	25	1	1	2	24	46795.6
63.1	2	NA	82	76	62	NA	126	120	124	NA	123	8.01	104	4.2	5.1	25	1	1	2	19	70173.4
64.2	2	NA	NA	NA	82	90	NA	NA	132	134	97	3.93	104	4.3	5.7	25	1	1	2	23	44614.4
50.8	2	NA	44	44	46	NA	96	90	94	NA	131	2.71	102	3.7	2.8	26	2	1	1	25	41415.7
51.9	2	NA	62	68	70	NA	102	98	98	NA	64	14.92	106	4	3.6	26	2	1	2	28	35482.8
62.1	NA	NA	58	56	50	NA	100	106	108	NA	173	13.84	104	4.5	5.8	26	1	1	2	16	46209.1
78.5	2	NA	52	NA	NA	38	114	NA	NA	106	151	19.08	105	4	5.8	26	1	1	2	25	36475.7
99.2	2	NA	50	44	46	NA	110	114	108	NA	91	25.41	105	3.7	2.9	26	2	1	1	25	5186.48
46.4	2	NA	64	66	66	NA	112	112	112	NA	94	8.97	103	3.5	2.8	26	2	1	2	17	39114
65.3	2	NA	70	NA	66	62	114	NA	116	112	97	13.07	103	3.8	4.7	26	1	1	2	28	32989.2
82.5	2	NA	72	74	76	NA	116	116	120	NA	133	16.07	104	4.1	2.3	26	2	1	1	22	53388.5
85.8	2	NA	46	74	52	NA	116	120	116	NA	64	10.92	101	3.7	6.1	26	1	1	1	15	45489.8
60.5	2	NA	76	80	80	NA	122	118	114	NA	103	5.04	104	3.9	6.6	26	1	1	2	24	47068
101	2	NA	72	78	76	NA	126	124	122	NA	157	32.81	107	3.9	3.7	26	2	1	2	22	83914.3
84.7	2	NA	74	84	70	NA	134	128	128	NA	84	13.82	104	4.2	7.6	26	1	1	2	27	70035.3
55.2	2	NA	NA	NA	NA	NA	NA	NA	NA	NA	85	8.61	103	3.6	5.5	26	2	1	2	28	38035.4
91.5	1	2	70	74	70	NA	112	110	104	NA	134	15.62	104	4	4.9	26	2	1	1	17	38852.1
79.7	1	2	62	56	60	NA	110	112	116	NA	92	10.93	101	3.8	3.3	26	2	1	1	28	46232.3
91.3	1	1	NA	NA	90	98	NA	NA	146	138	95	9.21	105	3.8	4.1	26	2	1	2	25	41194.2
51.7	2	NA	70	70	70	NA	104	98	100	NA	131	7.58	104	3.8	5.6	27	2	1	2	15	49039.4
61.9	2	NA	70	70	NA	72	108	106	NA	106	87	11.14	104	3.9	5.6	27	2	1	1	25	35399.3
59.3	2	NA	70	72	70	NA	110	106	110	NA	114	12.13	103	3.8	4.2	27	2	1	1	15	38910.8
56.7	2	NA	NA	NA	82	70	NA	NA	108	112	125	10.18	107	3.9	4.9	27	2	1	2	17	34124.2
78.2	2	NA	84	72	76	NA	106	114	114	NA	157	30.13	102	3.9	6.7	27	1	1	2	27	61073.7
83.1	2	NA	70	70	76	NA	118	110	106	NA	173	14.76	104	3.4	4	27	2	1	1	15	4339.58
62.6	2	NA	74	66	70	NA	120	114	114	NA	112	7.2	102	3.8	2.9	27	2	1	2	27	12656.2
62.8	2	NA	84	NA	62	86	124	NA	122	116	161	13.83	104	4	6.7	27	1	1	2	17	32977
104.1	2	NA	54	52	46	NA	130	124	126	NA	91	18.37	103	3.9	4.9	27	2	1	1	17	7040.42
87.8	2	NA	84	80	84	NA	130	132	128	NA	134	14.94	105	4.4	5.7	27	2	1	2	17	44124.3
61.9	2	NA	NA	NA	NA	NA	NA	NA	NA	NA	71	8.66	101	4	2.8	27	2	1	2	28	5394.08
90.6	2	NA	NA	NA	NA	NA	NA	NA	NA	NA	118	10.55	103	4.1	5.3	27	2	1	2	28	33544.2
98.9	1	2	NA	72	NA	NA	NA	122	NA	NA	116	21.35	101	4.1	7.6	27	1	1	1	25	40860.1
64.5	2	NA	70	72	72	NA	106	108	104	NA	72	3.96	104	3.9	4.4	28	2	1	2	23	52942.3
63.7	NA	NA	62	60	NA	68	112	112	NA	108	114	10.64	101	5.1	3.4	28	1	1	2	16	46209.1
87.8	2	NA	60	60	58	NA	112	112	112	NA	63	11.7	101	3.8	4.9	28	2	1	1	17	4111.63
69.3	2	NA	64	62	NA	58	114	116	NA	110	106	5.98	104	3.9	7.3	28	1	1	2	23	44289
77.1	2	NA	80	80	80	NA	116	110	116	NA	155	7.01	102	4.2	5.9	28	1	1	2	15	40313.7
67.8	2	NA	66	64	64	NA	116	114	114	NA	157	11.42	104	3.7	4.9	28	2	1	1	17	4681.49
73.8	2	NA	64	66	60	NA	120	112	114	NA	117	13.84	102	4.1	6.2	28	1	1	2	22	47633.7
82.7	2	NA	42	40	40	NA	112	116	120	NA	133	11.8	106	3.9	6.9	28	1	1	2	17	36879.7
90.2	2	NA	78	64	NA	76	122	112	NA	116	177	7.85	103	4.7	5.3	28	1	1	2	16	46209.1
71	2	NA	66	70	66	NA	116	120	116	NA	120	9.27	101	3.8	5.3	28	1	1	1	17	33811.7
68.7	1	1	0	NA	NA	44	116	NA	NA	106	46	12.79	105	3.8	3.3	28	2	1	2	26	11403.4
96.9	2	NA	90	90	92	NA	122	112	106	NA	85	25.19	108	4.2	4.9	28	2	1	2	17	34979.3
77.2	2	NA	68	72	88	NA	140	142	154	NA	116	7.86	103	4.2	4.5	28	1	1	1	15	41819
49.1	NA	NA	46	50	56	NA	102	96	94	NA	128	6.14	103	4.7	3.4	29	1	1	2	16	57481.3
75	2	NA	56	62	64	NA	98	98	98	NA	84	21.9	100	4.4	4.5	29	2	1	2	25	41829.5
66.2	2	NA	64	74	70	NA	100	104	102	NA	104	10.39	106	3.8	4.4	29	2	1	2	28	42487
74.8	2	NA	70	64	66	NA	104	104	102	NA	91	8.59	103	4	5	29	1	1	1	22	45780
67.2	2	NA	56	60	60	NA	102	106	106	NA	104	6.12	105	3.6	3	29	2	1	2	17	5768.83
55.7	2	NA	58	NA	NA	NA	106	NA	NA	NA	85	10.79	102	3.9	4.4	29	2	1	2	16	51616.3
83.1	2	NA	70	76	76	NA	110	104	104	NA	119	10.8	105	4.3	6	29	1	1	2	27	62784.1
102.6	2	NA	76	76	72	NA	106	104	110	NA	149	14.16	100	3.8	7.4	29	1	1	1	26	61532.2
102.2	2	NA	64	58	64	NA	110	108	106	NA	152	18.1	99	3.9	5.3	29	2	1	1	17	40438.8
75.9	2	NA	NA	64	60	58	NA	112	108	108	59	8.91	104	3.8	4.2	29	2	1	1	15	43127.2
72.6	2	NA	80	84	82	NA	148	150	142	NA	122	7.01	103	4	5.5	29	1	1	2	20	49017.3
57.1	2	NA	60	64	62	NA	98	100	98	NA	105	6.36	101	4	3.4	30	2	1	2	25	33508.2
73.3	2	NA	72	68	68	NA	100	108	104	NA	133	8.91	104	3.8	4.5	30	2	1	2	17	39114
62.1	2	NA	78	NA	82	76	98	NA	110	106	115	8.5	97	3.8	5	30	2	1	1	15	48709
70.4	2	NA	66	66	70	NA	108	106	100	NA	78	10.35	103	4.5	5.4	30	2	1	2	15	53591
68.3	2	NA	70	70	74	NA	110	106	104	NA	85	8.93	105	4.1	4.9	30	2	1	2	24	57324
76.3	2	NA	68	70	68	NA	108	110	106	NA	135	8.68	104	4	4.7	30	1	1	2	17	32977
77.6	2	NA	68	64	60	NA	108	108	108	NA	124	9.8	104	3.6	3.5	30	2	1	2	25	6204.88
82.9	2	NA	64	60	58	NA	114	112	108	NA	98	17.56	103	4.5	5.6	30	1	1	1	28	33951.5
61.1	2	NA	68	70	70	NA	112	112	112	NA	92	6.02	102	4.2	5.4	30	1	1	1	15	43630.2
67.5	2	NA	50	42	38	NA	118	116	112	NA	86	5.32	101	4.3	5.2	30	1	1	1	28	33570.4
69.5	2	NA	56	50	46	NA	120	120	108	NA	130	6.15	100	4.1	5.2	30	1	1	1	17	33811.7
56.1	2	NA	NA	56	NA	NA	NA	118	NA	NA	105	4.24	101	3.8	5.7	30	1	1	1	15	39461.6
50.7	2	NA	86	78	80	NA	122	116	126	NA	109	7.09	103	4.4	5.9	30	1	1	2	27	73437.3
72.9	NA	NA	70	NA	64	72	132	NA	130	132	94	7.9	100	3.8	5.9	30	1	1	1	25	43505.7
66.6	1	1	62	66	66	NA	98	104	104	NA	87	8.19	101	4.2	3.2	30	2	1	2	25	36269.2
109.3	1	2	62	64	66	NA	112	118	122	NA	121	26.09	104	4.1	5.9	30	1	1	1	15	38497.8
51.1	2	NA	60	60	64	NA	94	96	96	NA	122	5.2	103	4.1	2.3	31	2	1	2	25	35824.4
58.2	2	NA	62	NA	64	60	100	NA	98	102	161	6.44	105	3.7	4	31	2	1	2	17	34124.2
64.5	2	NA	54	60	46	NA	104	100	100	NA	156	6.08	102	3.9	3.5	31	2	1	2	25	40570
69.1	2	NA	50	60	54	NA	104	106	106	NA	131	8.03	102	3.5	5.3	31	2	1	1	17	3970.6
109.6	2	NA	64	62	60	NA	106	110	106	NA	109	31.08	105	3.8	2.9	31	2	1	2	27	10325
71.9	2	NA	68	76	76	NA	112	110	104	NA	108	10	99	3.7	3.1	31	2	1	1	22	53234.1
52.5	2	NA	62	NA	68	74	112	NA	114	112	115	5.68	104	4.1	2	31	2	1	2	25	32129.5
91.9	2	NA	86	86	90	NA	114	116	118	NA	49	16.23	103	3.8	4.9	31	1	1	2	28	38822
58.3	2	NA	NA	56	54	58	NA	128	124	120	71	15.09	101	3.8	3.7	31	2	1	2	25	32129.5
101.7	2	NA	74	58	NA	70	134	122	NA	126	137	32.91	102	3.9	8.5	31	1	1	2	25	36834.6
83.3	2	NA	88	82	76	NA	134	136	146	NA	144	27.1	104	3.7	5.8	31	1	1	1	15	34834.6
83.2	2	NA	NA	84	74	66	NA	152	142	150	141	11.51	100	4	6.8	31	1	1	2	28	37937.2
57.4	2	NA	52	56	58	NA	94	96	92	NA	80	5.96	106	4.1	3.4	32	2	1	1	15	38558.4
98.2	2	NA	72	72	76	NA	110	110	110	NA	80	15.68	102	4.3	4.7	32	2	1	1	22	49577.1
80.6	2	NA	66	NA	NA	76	110	NA	NA	112	113	8.91	103	4	4.6	32	1	1	1	28	34889.6
72.5	2	NA	76	68	70	NA	118	112	110	NA	136	8.23	108	4	7.8	32	1	1	2	22	52478.6
64.5	NA	NA	70	78	70	NA	130	122	112	NA	129	13.54	105	4.3	6	32	1	1	1	17	30227.4
74.5	2	NA	70	66	60	NA	102	98	100	NA	52	15.05	105	4.6	4.2	33	2	1	1	17	34982.3
101	2	NA	58	56	58	NA	112	102	104	NA	86	11	104	4.1	4.5	33	2	1	1	15	55630.8
90.9	2	NA	70	68	72	NA	108	110	110	NA	117	11.68	106	4.4	4.9	33	1	1	2	22	52784.1
98.4	2	NA	58	60	56	NA	106	114	112	NA	92	17.26	103	3.9	3.6	33	2	1	2	19	15428.6
86.5	2	NA	74	74	NA	70	116	112	NA	108	109	12.54	102	4.2	5.6	33	1	1	2	25	33512.5
88.5	2	NA	68	70	66	NA	116	118	114	NA	105	8.19	104	4.1	6.1	33	1	1	2	28	40821.3
89.7	2	NA	80	66	68	NA	126	120	124	NA	193	7.62	105	4.5	5.6	33	2	1	2	27	12975.8
80.8	2	NA	82	74	72	NA	126	128	130	NA	144	12.54	105	4.2	4.8	33	1	1	2	17	33831.9
69.2	2	NA	50	54	56	NA	94	94	94	NA	126	15.18	106	4.3	3.5	34	2	1	2	22	58299.3
71.2	2	NA	60	56	48	NA	100	102	92	NA	159	11.59	103	4	2.9	34	2	1	2	17	8486.34
56.3	2	NA	64	66	66	NA	98	100	100	NA	38	6.24	103	4	5.2	34	1	1	2	27	78885.4
67.2	2	NA	62	74	64	NA	104	104	98	NA	165	18.58	106	3.8	5.9	34	1	1	1	15	39281.2
78.9	2	NA	70	72	76	NA	106	102	110	NA	72	37.27	107	4.4	4.6	34	2	1	2	26	49777.8
90.2	2	NA	NA	72	66	NA	NA	108	108	NA	162	14.15	105	4.3	6.6	34	1	1	2	17	40258.4
59.5	2	NA	80	76	80	NA	106	110	114	NA	122	5.72	103	4.5	4.7	34	2	1	1	22	47320.6
78.6	2	NA	60	NA	50	NA	112	NA	112	NA	179	7.64	99	3.6	7.1	34	1	1	2	25	36834.6
81.1	2	NA	64	68	NA	80	120	116	NA	118	170	16.07	102	4.1	6.9	34	1	1	2	25	39492.1
82.7	2	NA	82	86	84	NA	124	122	120	NA	130	17.7	102	4.3	4.5	34	1	1	1	17	35680.2
68.9	2	NA	86	84	82	NA	116	108	108	NA	170	14.58	104	4	6.9	35	1	1	2	26	47826.3
61.7	2	NA	80	76	78	NA	120	114	114	NA	124	6.37	101	3.8	2.9	35	2	1	1	22	46033.4
90.1	2	NA	72	68	64	NA	116	118	118	NA	68	11.92	102	3.6	3.8	35	2	1	1	28	40882.9
78.9	2	NA	74	78	68	NA	122	116	118	NA	92	8.81	103	3.9	4.6	35	1	1	2	17	38862.3
63.6	2	NA	76	80	84	NA	126	118	114	NA	82	8.41	102	3.7	6.3	35	1	1	2	19	69189.9
84.7	1	2	74	76	82	NA	124	124	120	NA	119	36.89	107	3.9	4.4	35	2	1	2	17	48130.6
86.1	2	NA	74	72	NA	70	146	142	NA	140	174	12.32	102	4.3	4.9	35	1	1	1	15	40910.2
65	2	NA	64	64	62	NA	94	94	98	NA	102	8.39	103	3.9	5.9	36	1	1	2	22	48517.9
88.6	2	NA	54	60	NA	56	98	100	NA	96	118	11.6	107	4.2	5.2	36	1	1	2	23	48311.8
114.6	2	NA	46	50	46	NA	114	112	110	NA	110	9.73	102	3.8	3.8	36	2	1	1	17	7043.12
82.6	2	NA	68	62	NA	60	114	118	NA	108	144	18.25	101	4.1	6.3	36	1	1	2	25	35936.9
65.4	2	NA	66	76	66	NA	116	116	112	NA	73	7.88	106	3.7	4.4	36	2	1	1	15	44196.7
114.5	2	NA	58	58	62	NA	116	116	114	NA	65	40.32	104	3.9	4.8	36	2	1	1	25	34478.4
72.6	2	NA	74	70	68	NA	124	120	122	NA	109	12.76	105	3.9	4.4	36	2	1	2	25	41941
81.4	2	NA	76	60	66	NA	138	130	126	NA	138	12.1	101	4.5	5.4	36	1	1	1	22	53252.3
53.2	2	NA	70	70	72	NA	104	98	106	NA	118	5.93	99	4	3.2	37	2	1	1	22	43367.8
70.3	2	NA	70	62	64	NA	104	110	104	NA	205	10.05	103	3.9	3.2	37	2	1	1	22	53754.3
111.2	2	NA	58	NA	60	68	120	NA	116	116	77	20.1	100	4	3.6	37	2	1	1	28	45659.3
67.4	2	NA	74	66	76	NA	124	116	116	NA	117	33.57	101	3.4	5.4	37	2	1	2	25	35824.4
127.1	2	NA	84	86	82	NA	120	114	124	NA	130	49.96	102	3.8	8.3	37	1	1	2	24	44345
97.7	2	NA	74	72	76	NA	122	126	124	NA	123	25.41	105	3.9	5	37	1	1	2	22	51369.2
85.7	2	NA	84	86	88	NA	130	124	134	NA	304	9.53	102	3.8	6.3	37	1	1	1	22	54605.9
71	2	NA	74	72	68	NA	110	106	108	NA	112	9.51	107	4.1	2.7	38	2	1	2	22	62665.1
55.9	2	NA	74	70	70	NA	114	118	108	NA	132	9.33	105	4.1	3.7	38	2	1	2	22	63797.8
41.2	2	NA	76	82	72	NA	144	146	138	NA	86	3.94	103	4.1	4.5	38	2	1	1	16	53898.1
91.3	2	NA	86	80	80	NA	146	146	142	NA	138	12.75	97	4.7	6.3	38	1	1	1	22	50183.1
58.6	2	NA	66	56	62	NA	110	102	104	NA	113	7.06	104	4	3.3	39	2	1	2	22	60272.7
74	2	NA	78	78	78	NA	104	106	106	NA	102	12.2	105	3.8	4.7	39	2	1	2	17	38962.9
52.5	2	NA	74	70	62	NA	126	116	112	NA	96	7.12	101	3.5	2.9	39	2	1	2	25	39478.5
93	2	NA	70	72	70	NA	116	118	124	NA	117	11.86	101	4.2	5.4	39	1	1	2	17	38862.3
100.4	2	NA	66	66	72	NA	120	120	120	NA	131	16.31	102	4.3	6.6	39	1	1	1	22	47845
86.8	2	NA	78	82	80	NA	122	120	126	NA	117	11.16	103	4.5	6.1	39	1	1	1	25	41610.7
111.9	1	1	NA	82	74	NA	NA	116	112	NA	132	15.94	103	3.9	5.4	39	2	1	2	19	73532.1
56.8	2	NA	70	64	68	NA	96	96	98	NA	106	4.96	103	3.9	6	40	2	1	2	26	21115.8
104.8	2	NA	60	58	52	NA	108	102	100	NA	93	18.29	103	4	5.2	40	2	1	1	22	23280.2
82.6	2	NA	78	78	78	NA	118	110	104	NA	92	17.22	105	4	4.2	40	2	1	2	23	28760
53.1	2	NA	60	66	64	NA	114	112	112	NA	130	8.95	105	3.7	4.1	40	2	1	2	20	27876
59.2	2	NA	80	74	78	NA	118	116	106	NA	98	12.01	103	3.8	4.2	40	2	1	2	17	19354.8
66.4	2	NA	70	80	78	NA	120	130	126	NA	119	14.97	104	4.4	5.2	40	2	1	2	15	25086.3
68.2	1	2	86	84	86	NA	126	126	122	NA	146	10.48	106	3.7	2.8	40	2	1	2	25	15329.7
70.3	2	NA	50	NA	0	0	150	NA	144	144	118	16.63	103	3.9	4.9	40	1	1	2	17	24926.7
72	2	NA	58	58	62	NA	96	94	92	NA	118	10.39	106	4	4.6	41	1	1	1	15	26344.8
70.3	2	NA	60	52	58	NA	104	106	102	NA	85	14.78	104	3.9	5.2	41	2	1	2	17	19554.1
61.8	2	NA	78	82	80	NA	104	110	110	NA	162	7.86	98	3.7	3.5	41	2	1	1	22	19597.1
83	2	NA	86	NA	90	84	110	NA	116	118	159	14.56	101	4.2	6	41	1	1	2	25	22180
66.8	2	NA	92	88	88	NA	124	126	120	NA	204	11.27	102	3.8	6.3	41	1	1	2	28	20531.3
67.8	2	NA	68	76	72	NA	130	126	124	NA	133	10.17	104	4.5	5.8	41	2	1	2	17	24131.3
81.1	2	NA	80	82	82	NA	136	130	126	NA	88	33.31	103	3.9	4.7	41	2	1	2	25	19258.7
104.1	2	NA	NA	NA	NA	NA	NA	NA	NA	NA	110	14.44	102	3.8	4.9	41	2	1	1	15	26072.8
86.2	2	NA	90	90	90	NA	130	130	122	NA	151	11.39	103	4	6.8	41	1	1	2	15	27345.2
90.1	2	NA	94	90	92	NA	128	128	126	NA	170	53.82	105	4.3	6.9	41	1	1	1	15	28250.4
79.8	2	NA	78	80	74	NA	138	146	140	NA	159	7.6	101	3.9	4.4	41	1	1	1	22	30344.5
76.8	2	NA	60	64	62	NA	98	92	94	NA	138	7.06	103	4	4.8	42	1	1	2	22	38918.8
66	2	NA	68	68	70	NA	100	100	98	NA	115	10.52	100	4	3.7	42	2	1	2	24	32863
74.2	2	NA	62	62	NA	NA	104	102	NA	NA	115	12.52	105	3.7	3.5	42	2	1	2	28	19485.8
68.1	2	NA	70	64	66	NA	112	110	106	NA	141	8.92	101	4.2	3	42	2	1	1	22	24219.8
110.1	2	NA	90	86	86	NA	120	122	126	NA	104	29.21	103	3.6	7.4	42	1	1	2	15	32964.5
52.4	2	NA	86	88	82	NA	128	126	126	NA	97	8.71	104	3.5	3.6	42	2	1	2	27	35097.4
83.2	2	NA	NA	84	NA	88	NA	128	NA	132	171	14.17	100	4.5	6.8	42	1	1	2	25	21963.9
81.6	2	NA	68	68	70	NA	144	132	132	NA	118	6.22	110	3.8	5.4	42	1	1	2	23	34385.4
80.8	1	1	74	62	60	NA	108	114	112	NA	96	7.71	97	3.9	5.4	42	1	1	2	25	22544.1
109.4	1	2	NA	76	72	76	NA	116	112	126	163	17.3	104	4.4	4.9	42	2	1	1	19	32021.8
77.1	2	NA	64	70	70	NA	94	100	104	NA	167	8.54	103	4.2	4.1	43	2	1	1	22	24889.4
60.2	2	NA	70	70	70	NA	104	98	106	NA	82	13.79	104	4	4.6	43	2	1	2	15	35459.1
97.5	2	NA	74	68	NA	78	112	112	NA	100	129	7.1	100	3.7	6.4	43	1	1	2	19	44525.5
112.3	2	NA	82	86	84	NA	122	122	118	NA	107	27.59	107	4	4	43	2	1	2	17	20379.4
58.9	2	NA	76	76	76	NA	134	124	122	NA	175	6.36	100	4.2	6.7	43	2	1	2	25	16299
70.9	2	NA	90	88	90	NA	136	138	140	NA	104	20.25	100	4.6	7.5	43	1	1	2	24	34843.7
49.1	1	2	92	94	NA	86	114	112	NA	116	101	4.04	105	4.2	6.3	43	1	1	2	23	30569.3
59.5	1	2	80	80	84	NA	142	136	136	NA	142	10.7	106	4	3.9	43	2	1	1	25	19571.4
82.1	2	NA	60	64	66	NA	94	98	94	NA	97	10.15	104	3.9	5.5	44	2	1	2	27	32526.6
78.6	2	NA	64	70	70	NA	100	96	98	NA	99	4.8	109	4.1	6.2	44	1	1	2	15	30100
50	2	NA	80	80	76	NA	104	100	102	NA	146	3.75	103	4	4.4	44	2	1	2	24	30684.2
74.8	2	NA	80	78	86	NA	108	112	104	NA	110	8.9	105	4	5.4	44	1	1	2	23	29696.9
58.7	2	NA	80	76	72	NA	122	120	110	NA	101	16.79	102	4.2	5.6	44	2	1	2	27	31374.4
101.9	2	NA	78	86	74	NA	118	130	120	NA	88	9.78	100	3.8	3.8	44	2	1	1	15	33135.7
91.6	2	NA	68	66	NA	74	122	128	NA	124	117	15.13	104	4.5	7.8	44	1	1	1	19	34474.8
86.6	2	NA	90	NA	80	94	128	NA	122	130	147	7.32	103	4.6	7	44	1	1	2	26	27781.6
114.6	2	NA	NA	NA	NA	NA	NA	NA	NA	NA	124	55.48	102	3.8	8.5	44	1	1	1	28	25827.6
73.7	1	2	84	86	NA	NA	126	126	NA	NA	135	16.82	102	4.1	3.7	44	2	1	1	28	26331.6
89.2	2	NA	64	64	70	NA	90	92	96	NA	119	7.83	107	3.9	3.9	45	2	1	1	22	24219.8
78.5	2	NA	66	70	70	NA	102	98	104	NA	148	8.3	109	4.5	5.2	45	1	1	2	17	25632
73.3	2	NA	64	70	68	NA	104	106	104	NA	108	10.53	105	3.7	4.1	45	2	1	2	25	15390.3
62.8	2	NA	72	64	70	NA	106	108	108	NA	109	11.99	99	4.2	4.4	45	2	1	1	28	22589
61.8	2	NA	66	70	58	NA	110	112	110	NA	153	7.6	102	3.5	6.3	45	1	1	1	25	25250.3
92.2	2	NA	72	72	70	NA	116	114	110	NA	97	16.15	104	4	5.1	45	1	1	2	22	38630.3
59.5	2	NA	76	78	74	NA	114	118	116	NA	151	10.62	105	4.1	4.3	45	2	1	2	27	31374.4
91.1	2	NA	68	70	70	NA	116	116	120	NA	124	9.53	104	3.3	5.5	45	2	1	1	22	24290.1
96.7	2	NA	84	86	90	NA	124	124	126	NA	136	5.18	103	4.4	7	45	1	1	1	17	26655.3
91.4	2	NA	82	84	90	NA	128	126	124	NA	137	21.49	107	3.9	7.2	45	1	1	2	24	28806.5
84.3	2	NA	86	84	NA	80	132	126	NA	124	126	18.8	103	4.1	5.7	45	1	1	1	25	23960.1
91.2	2	NA	88	84	78	NA	136	142	136	NA	157	16.27	101	4.2	6.4	45	1	1	1	22	28387.3
92.2	1	2	84	80	78	NA	134	136	118	NA	137	30.92	101	3.6	7.8	45	1	1	1	22	32885.6
70.4	2	NA	100	90	100	NA	150	138	146	NA	127	11.11	107	4.1	4.5	45	1	1	2	17	24106.8
77.2	1	1	80	80	76	NA	140	158	156	NA	151	17.66	99	4.1	5	45	2	1	1	17	20288.1
57.8	2	NA	60	70	62	NA	114	112	110	NA	119	10.62	99	4.2	2.9	46	1	1	2	25	21052.1
73.1	2	NA	74	80	74	NA	100	118	120	NA	141	8.95	99	3.8	5.6	46	1	1	1	22	25386.2
76.1	2	NA	78	78	82	NA	114	116	114	NA	105	15.18	100	3.5	5.3	46	1	1	2	20	34829.4
75.9	2	NA	60	64	56	NA	120	114	126	NA	131	11.54	102	4.2	4.9	46	1	1	1	22	35160.9
88.8	2	NA	74	72	74	NA	134	120	114	NA	103	15.54	108	3.9	4	46	2	1	1	17	24924.4
79.5	2	NA	76	80	76	NA	124	124	134	NA	181	20.22	101	4.4	5.4	46	1	1	2	19	39086.5
100.7	2	NA	84	90	88	NA	132	124	130	NA	121	19.87	100	3.7	6.4	46	1	1	2	19	37882.3
174.1	1	1	NA	NA	NA	NA	NA	NA	NA	NA	109	47.06	101	3.7	6.6	46	1	1	2	28	27272.9
71.3	2	NA	64	70	70	NA	96	104	100	NA	109	13.58	104	4	4	47	2	1	1	17	23245.5
58.9	2	NA	NA	76	NA	72	NA	104	NA	104	98	7.37	103	4	4.1	47	2	1	1	28	17317.5
79.9	2	NA	80	78	72	NA	114	102	108	NA	159	17.46	109	4.3	5.4	47	1	1	2	17	25260.4
81.7	2	NA	72	76	74	NA	116	114	102	NA	90	9	108	3.8	4.9	47	2	1	2	22	35134.7
112.3	2	NA	64	70	64	NA	112	114	106	NA	124	23.4	100	4.2	5.8	47	1	1	1	17	23895.4
76.4	2	NA	74	78	NA	NA	138	124	NA	NA	123	6.22	105	3.9	3.3	47	2	1	1	19	27046.1
57.2	2	NA	94	70	76	NA	140	134	136	NA	135	9.24	104	4.2	3.8	47	2	1	1	28	14643.5
83.6	2	NA	NA	NA	NA	NA	NA	NA	NA	NA	61	24.02	109	4.2	10.2	47	1	1	1	28	20976.1
82.2	1	1	66	70	66	NA	110	106	98	NA	64	12.34	105	4.3	5.6	47	2	1	2	17	22795.7
72.4	1	2	NA	68	68	66	NA	128	124	122	110	9.28	102	4.1	3.7	47	2	1	2	28	20518.7
152.4	1	1	94	96	90	NA	144	146	142	NA	61	165.64	107	4.6	6.1	47	2	1	2	28	26331.6
90.2	2	NA	70	78	NA	82	162	166	NA	162	136	30.97	105	4.2	5.2	47	2	1	2	28	22033.8
61.3	2	NA	74	78	70	NA	112	116	106	NA	111	5.42	105	4.2	5.1	48	1	1	1	25	20863.2
110.8	2	NA	92	82	84	NA	114	114	110	NA	106	18.42	97	3.7	4.5	48	2	1	2	25	18020.5
82.6	2	NA	78	90	88	NA	128	128	128	NA	113	14.53	104	4.3	4.2	48	2	1	1	15	27194.5
65.1	2	NA	70	66	70	NA	114	110	110	NA	56	4.8	103	3.9	3.8	49	2	1	2	28	24615.8
83.2	2	NA	70	76	70	NA	120	114	114	NA	127	18.77	100	4.1	4.3	49	2	1	1	22	19730.9
93.3	NA	NA	70	68	66	NA	102	124	126	NA	68	7.4	105	3.8	4.8	49	2	1	2	22	31087.4
64.8	2	NA	72	NA	74	72	122	NA	124	118	143	10.19	101	3.9	4.3	49	1	1	1	15	24121.7
79.9	NA	NA	NA	NA	NA	NA	NA	NA	NA	NA	104	12.13	102	3.7	5.1	49	1	1	2	28	18670
65.5	1	2	70	72	72	NA	164	158	154	NA	100	7.36	104	4	4.3	49	2	1	2	19	28366.4
106.9	1	1	78	92	NA	NA	152	166	NA	NA	71	33.1	104	4	7.3	49	1	1	2	28	31006.4
70.2	2	NA	88	90	90	NA	138	138	144	NA	216	9.06	108	4.3	3.8	50	1	1	2	17	23474.9
75.1	1	1	74	66	64	NA	162	146	146	NA	119	22.2	109	5.7	10.4	50	1	1	2	15	29406.9
77	2	NA	72	72	76	NA	120	108	114	NA	113	11.06	106	4.2	5	51	2	1	1	15	33135.7
85.4	2	NA	68	72	76	NA	114	120	122	NA	92	16	104	4.3	5.7	51	2	1	1	15	27954.1
62.2	2	NA	74	NA	66	68	126	NA	124	118	123	7.61	100	3.9	5.6	51	1	1	1	15	26158.6
108.2	2	NA	NA	78	68	76	NA	126	118	128	97	17.6	103	4.5	7.7	51	1	1	2	28	26751.5
80.2	2	NA	78	82	78	NA	134	146	130	NA	148	10.15	102	3.7	7.7	51	1	1	2	25	21042.6
61.6	1	2	90	90	90	NA	152	144	148	NA	136	11.07	103	4	5.4	51	2	1	2	15	27145.5
65.5	2	NA	74	76	NA	74	166	170	NA	158	103	8.02	103	3.9	7.4	51	2	1	2	17	22256.4
88.1	1	2	80	82	78	NA	178	168	168	NA	90	23.8	102	4	6.8	51	1	1	2	17	24181.8
59.1	2	NA	74	70	70	NA	112	104	104	NA	73	4.89	104	4.1	3.6	52	2	1	2	27	30338.7
90.5	2	NA	70	70	68	NA	112	112	110	NA	109	20.47	107	4.2	5.3	52	2	1	2	17	21930.2
92.3	2	NA	76	74	80	NA	114	112	112	NA	93	53.04	104	4	5.2	52	2	1	2	15	25086.3
98.9	2	NA	78	70	78	NA	140	134	142	NA	144	21.09	98	4.1	3.6	52	2	1	1	22	29502.9
67.9	1	1	92	86	86	NA	158	154	140	NA	163	7.22	107	4	5.5	52	1	1	2	22	41326.8
100.1	2	NA	72	76	72	NA	96	100	104	NA	167	11.24	100	3.8	4.8	53	1	1	1	15	25260.9
84.2	2	NA	68	70	74	NA	110	106	106	NA	139	5.71	103	4.4	4.6	53	1	1	1	28	22036.9
98.8	1	2	72	78	74	NA	122	124	126	NA	94	11.52	104	4.1	5.5	53	2	1	2	17	27652.5
81.1	2	NA	76	74	78	NA	120	120	116	NA	120	9.38	107	4.4	4.6	54	1	1	2	27	36236.1
118.3	2	NA	NA	NA	NA	NA	NA	NA	NA	NA	97	29.49	99	4.1	5.9	54	1	1	1	15	27648.9
90.6	1	1	80	74	74	NA	104	102	108	NA	72	17.91	108	4.2	8.6	54	1	1	2	17	28681.2
65.3	2	NA	74	78	74	NA	108	106	112	NA	149	4.45	103	4	6.7	55	2	1	2	23	32346.7
77.1	1	1	80	76	74	NA	124	124	112	NA	142	14.79	101	4	5.5	55	2	1	2	27	28740.8
71.5	2	NA	76	78	80	NA	132	132	124	NA	169	7.69	92	4.3	3.5	56	1	1	1	15	34650.5
91.7	2	NA	70	70	NA	72	142	138	NA	134	142	13.73	107	4.1	5.3	56	2	1	2	17	23074.4
62.1	2	NA	82	84	88	NA	154	150	148	NA	136	7.17	103	3.7	3.8	56	2	1	2	23	28887.7
53.5	1	1	NA	NA	NA	NA	NA	NA	NA	NA	109	6.78	106	4.4	4.3	56	2	1	2	27	30298.3
77.3	2	NA	78	86	80	NA	120	124	122	NA	147	9.03	102	4	5.6	57	1	1	2	25	20455.4
135.9	2	NA	NA	84	88	NA	NA	138	136	NA	116	21.16	100	4.3	5.3	57	1	1	1	15	28962.8
57.6	1	1	80	NA	82	84	128	NA	124	130	119	5.39	103	4.3	4.1	57	1	1	1	15	28404
114	1	1	70	68	78	NA	144	140	140	NA	153	48.09	100	3.9	6.6	57	1	1	2	17	23830.5
93.3	2	NA	76	80	74	NA	104	112	106	NA	132	38.86	101	3.1	9.5	58	1	1	2	27	34843.7
84.6	1	2	78	78	NA	NA	192	172	NA	NA	126	14.37	101	4.2	9.1	58	1	1	2	25	20700
94.7	2	NA	84	86	78	NA	134	134	132	NA	98	14.23	106	3.8	6	59	1	1	2	22	34751.2
62.3	2	NA	60	56	48	NA	122	114	118	NA	153	9.4	104	3.8	2.6	60	2	1	1	17	9434.09
51.9	2	NA	80	70	74	NA	136	132	130	NA	138	11.38	106	3.6	4.3	60	2	1	2	15	13006
82	1	1	88	86	82	NA	162	164	154	NA	159	46.61	101	3.8	6.2	60	2	1	1	28	8657.83
86	1	1	NA	80	82	NA	NA	162	164	NA	155	21.09	102	4.1	5.7	60	1	1	2	28	6901.22
73.1	2	NA	76	68	76	NA	120	114	114	NA	151	11.27	102	3.8	5.6	61	1	1	2	24	10715.2
116.3	1	2	56	NA	NA	NA	122	NA	NA	NA	154	28.55	101	4.6	5.3	61	2	1	2	28	7395.78
105.6	1	1	56	60	54	NA	124	126	124	NA	141	19.69	103	4	6.7	61	1	1	2	17	9566.09
56.7	1	1	72	74	74	NA	136	136	132	NA	89	16.9	101	3.8	6.4	61	2	1	2	17	8043.58
110.9	1	1	74	NA	76	70	140	NA	138	132	125	22.04	101	3.9	5.1	61	1	1	1	28	6815.47
80.4	1	1	80	80	76	NA	146	134	134	NA	75	9.16	104	4.1	3.8	61	2	1	1	22	15642.7
63.1	2	NA	76	NA	NA	70	158	NA	NA	150	119	16.26	99	3.9	4.5	61	2	1	2	17	10764.4
120.9	2	NA	78	74	76	NA	114	106	104	NA	122	6.44	102	3.7	4.3	62	1	1	2	24	19012.3
61.3	2	NA	NA	70	76	72	NA	118	116	102	154	9.96	102	3.8	5.3	62	2	1	1	15	9759.4
92.6	2	NA	70	66	70	NA	124	114	114	NA	158	9.73	105	4.3	4.1	62	1	1	2	17	9908.91
87.8	1	1	66	66	60	NA	114	110	112	NA	130	16.21	105	3.9	4.2	62	1	1	1	28	5592.07
86.6	1	1	70	70	68	NA	116	118	118	NA	83	9.66	101	4.5	5.2	62	2	1	1	28	7222.39
89.2	1	1	66	70	70	NA	126	134	132	NA	142	16.05	99	4.2	9.9	62	2	1	2	27	21141.2
83.9	1	2	88	88	86	NA	152	154	142	NA	130	8.21	100	3.8	4.8	62	1	1	1	17	6306
77.8	2	NA	82	84	NA	NA	156	152	NA	NA	84	21.29	104	4.6	5.3	62	2	1	2	17	7511.57
105.2	1	1	90	100	90	NA	162	146	154	NA	108	17.59	101	4	7.4	62	1	1	1	22	11577.2
60.5	NA	NA	70	66	68	NA	98	112	106	NA	105	4.81	104	4.5	5.1	63	1	1	2	27	17071
64.9	2	NA	74	72	70	NA	100	108	116	NA	104	4.58	101	4.4	6.7	63	2	1	2	24	16318.6
82	2	NA	80	80	NA	84	130	130	NA	128	164	12.1	102	4	4.8	63	1	1	2	25	4234.73
74.2	1	1	76	70	64	NA	174	180	166	NA	95	13.71	96	4.1	4.2	63	2	1	2	27	20712.4
61.5	1	1	94	94	90	NA	186	176	180	NA	127	6.46	102	3.8	2.9	63	2	1	2	27	21141.2
83.5	2	NA	54	50	54	NA	104	98	92	NA	112	7.54	103	4.9	4.3	64	1	1	2	22	19385.8
62.9	2	NA	70	64	66	NA	126	122	122	NA	121	6.19	100	3.9	3.8	64	2	1	1	22	11110.5
78.3	2	NA	66	70	66	NA	132	128	134	NA	128	10.21	101	4.2	6.3	64	1	1	1	22	21349.8
66	2	NA	NA	NA	NA	NA	NA	NA	NA	NA	143	9.07	103	3.9	4.7	64	2	1	1	15	8817.52
67	1	1	78	70	74	NA	112	114	96	NA	103	24.25	105	4.2	6.1	64	2	1	2	27	11919.1
74.2	2	NA	92	88	88	NA	144	144	148	NA	146	17.34	106	4.2	4.9	64	1	1	2	15	8761.53
102	1	1	76	80	84	NA	150	146	140	NA	111	9.02	105	4.4	4.7	64	1	1	2	23	13263.4
55.6	2	NA	82	80	74	NA	162	154	146	NA	121	6.67	106	4	3.8	64	2	1	1	17	5651.24
78.2	2	NA	72	84	NA	68	166	160	NA	160	135	15.34	103	3.8	5.6	64	1	1	2	25	10706.5
78.9	1	2	NA	90	88	84	NA	182	172	176	121	9.26	104	3.8	4.6	64	1	1	1	25	9198.62
36.9	2	NA	60	NA	56	NA	124	NA	112	NA	129	5.23	106	4.1	4.4	65	2	1	1	28	7650.49
97.6	2	NA	78	74	72	NA	120	126	118	NA	105	17.87	105	4	5.9	65	2	1	1	22	8519.38
72.2	2	NA	64	66	66	NA	140	132	124	NA	177	9.89	101	4.1	5.1	65	1	1	2	27	18178.3
63	1	1	72	74	70	NA	134	140	132	NA	164	8.68	97	3.7	5.1	65	2	1	1	22	9109.03
62.8	1	1	84	78	86	NA	166	158	158	NA	143	14.01	102	3.6	6.6	65	2	1	2	17	7238.84
75	2	NA	70	70	72	NA	134	140	128	NA	89	29.65	104	4	3.7	66	2	1	2	27	14028.3
69.5	1	1	60	60	66	NA	128	134	124	NA	119	6.62	106	5.1	4.6	66	2	1	2	28	8592.44
68.6	1	1	50	52	NA	NA	130	132	NA	NA	129	14.98	105	3.5	5.2	66	2	1	2	25	7683.52
82.3	1	1	80	80	78	NA	142	132	134	NA	126	17.15	103	4.3	8.2	66	2	1	2	27	12310.9
88.6	1	2	68	70	70	NA	144	130	134	NA	115	12.87	100	4.1	6.6	66	1	1	2	17	4819.67
59.5	1	1	62	72	NA	66	154	150	NA	144	80	16.16	101	3.7	5.9	66	2	1	2	23	14577.8
81.7	1	1	76	76	76	NA	166	160	156	NA	165	20.75	105	4.3	4.6	66	2	1	2	28	10100.5
64.8	NA	NA	58	70	70	NA	118	118	118	NA	107	5.32	105	4.1	6.8	67	1	1	1	15	7016.51
87.2	2	NA	70	60	60	NA	120	124	112	NA	148	18	104	4.3	4.8	67	2	1	2	27	11377
54	1	1	70	70	74	NA	124	118	116	NA	114	14.5	103	3.8	5.7	67	2	1	2	27	13762.4
68.4	1	1	38	58	NA	36	138	130	NA	128	113	7.81	108	3.8	6.3	67	1	1	1	25	4525.25
65.2	2	NA	NA	0	0	NA	NA	92	102	NA	132	8.2	101	3.8	4.3	68	2	1	1	15	8956.6
58.6	2	NA	62	NA	78	66	136	NA	118	122	90	9.33	103	4	3.2	68	2	1	2	23	12394.5
114.6	2	NA	66	NA	68	68	136	NA	140	138	174	20.7	101	4.1	5.9	68	1	1	1	15	10717.1
78.4	2	NA	NA	NA	NA	NA	NA	NA	NA	NA	175	31.16	99	3.9	3.9	68	2	1	1	28	10628.3
89.6	1	1	62	60	60	NA	126	122	118	NA	122	7.63	100	4.2	5.5	68	1	1	1	28	11532
93.4	1	1	NA	70	66	68	NA	126	126	120	93	20.63	101	4.2	10.3	68	1	1	2	28	5529.56
74.7	1	1	76	NA	74	72	140	NA	122	124	92	18.43	103	3.6	6.7	68	2	1	2	17	6584.67
70	1	1	70	74	68	NA	146	124	134	NA	118	19.51	101	4	7	68	2	1	2	27	17145.6
70.3	2	NA	80	74	76	NA	148	140	132	NA	183	10.88	103	3.8	4.1	68	1	1	1	15	7081.35
82.1	2	NA	76	80	78	NA	126	150	148	NA	105	19.6	101	3.8	5.6	68	1	1	1	15	8308.29
87.2	1	1	68	64	58	NA	158	156	150	NA	84	9.2	102	4.2	5.5	68	2	1	2	15	12447
75.4	2	NA	92	90	90	NA	164	164	162	NA	157	8.71	102	5.1	5.7	68	1	1	2	17	4670.68
76.5	2	NA	82	78	72	NA	174	164	166	NA	108	10.42	102	5	4.3	68	1	1	1	15	5642.42
122.8	1	1	80	76	78	NA	142	138	154	NA	33	16.82	100	4.2	5.7	69	1	1	1	17	17110.1
51.9	2	NA	76	72	76	NA	144	156	144	NA	106	13.47	101	3.8	5.8	69	2	1	2	27	14176.8
48.1	2	NA	90	90	90	NA	204	192	184	NA	103	6.74	100	3.4	2.8	69	2	1	2	15	6393
62.9	2	NA	64	66	66	NA	130	124	126	NA	174	5.18	97	3.6	5.2	70	1	1	1	22	12183.4
66.3	1	1	74	68	68	NA	116	112	108	NA	125	18.6	107	4.1	6.2	70	2	1	2	22	25046.1
78.7	2	NA	60	64	66	NA	154	146	154	NA	131	10.93	105	3.6	8.1	70	1	1	2	27	10985.8
66.4	1	1	90	90	80	NA	164	154	156	NA	63	8.06	103	4.1	3.8	70	2	1	2	17	7570.4
55.8	2	NA	58	62	58	NA	104	108	104	NA	116	6.72	98	4.2	5.8	71	2	1	2	27	11201.8
64.7	2	NA	NA	NA	NA	NA	NA	NA	NA	NA	139	7.97	103	5.1	4.1	71	2	1	1	28	6674.5
47.9	2	NA	78	74	74	NA	142	146	142	NA	214	6.32	102	4.6	6.8	71	2	1	2	27	13588.8
108.1	2	NA	80	76	72	NA	122	118	116	NA	139	40.44	95	3.8	5.1	72	1	1	1	28	4925.29
65.3	2	NA	68	58	56	NA	124	118	118	NA	99	8.46	95	3.9	6.6	72	1	1	1	28	4885.17
66	2	NA	88	90	90	NA	128	126	124	NA	133	3.44	106	3.9	4.4	72	1	1	2	27	16422.1
66	2	NA	50	50	52	NA	134	136	134	NA	114	6.86	105	5.2	6.1	72	1	1	2	28	10079.1
63.1	1	1	64	72	NA	66	160	160	NA	154	127	11.17	104	4.4	6.3	72	2	1	1	28	10508.2
64.7	2	NA	60	64	62	NA	124	130	122	NA	89	20.23	104	3.9	6.7	73	1	1	2	15	8788.34
89.9	2	NA	70	68	70	NA	132	124	134	NA	124	19.11	101	4	6.3	73	1	1	1	28	4710.77
82.3	1	1	64	60	62	NA	120	114	116	NA	66	31.18	101	4.2	4.4	73	1	1	1	15	10107.1
69.9	2	NA	NA	66	76	70	NA	170	162	154	148	14.41	103	3.8	4.5	73	2	1	2	28	5376.03
57.1	1	1	92	96	NA	86	188	186	NA	180	149	5.46	101	4	4.6	73	2	1	2	25	5463.01
57.3	2	NA	70	74	76	NA	120	114	118	NA	163	7.31	99	3.7	4.6	74	2	1	1	17	5404.9
61.8	2	NA	68	64	60	NA	136	132	132	NA	88	5.28	97	3.6	3.2	74	1	1	2	23	11409.9
68.9	2	NA	86	90	90	NA	130	130	142	NA	215	18.84	103	4	4.1	74	2	1	2	27	11484.6
103.4	1	1	76	76	76	NA	110	116	106	NA	156	12.11	100	4.2	7.4	74	1	1	2	27	15910.6
65	1	1	56	54	60	NA	130	122	120	NA	121	8.59	106	4.3	5	74	1	1	2	17	11025.7
105.6	2	NA	82	80	76	NA	150	138	144	NA	65	24.89	103	4.2	5.5	74	1	1	2	28	5794.23
89.2	1	1	84	84	80	NA	144	146	148	NA	107	12.63	104	3.8	5.9	74	2	1	2	27	11658.2
91.8	2	NA	64	68	NA	60	168	172	NA	154	94	14.51	104	4	4.7	74	2	1	1	28	5380.22
93.5	2	NA	70	70	64	NA	114	114	112	NA	97	11.37	104	4.8	8	75	1	1	2	17	9484.58
62.1	2	NA	68	74	64	NA	136	138	136	NA	142	6.38	102	3.8	4.7	75	2	1	2	17	7655.15
91.2	1	1	60	72	70	NA	156	144	148	NA	104	36.96	101	4	6	76	1	1	1	15	13452.7
57.4	1	1	74	74	76	NA	154	156	150	NA	124	16.34	103	3.3	2.7	76	2	1	2	17	9341.66
75.5	1	1	80	80	80	NA	190	178	174	NA	46	5.17	101	4.6	5.8	77	1	1	2	17	8703.25
70.4	1	1	98	98	100	NA	204	204	196	NA	151	17.56	109	3.7	6.4	77	2	1	2	17	7238.84
62.3	2	NA	32	38	40	NA	120	104	106	NA	113	5.68	101	3.9	6.7	80	1	1	2	20	20288.2
81.1	1	1	60	56	60	NA	146	140	136	NA	154	19.32	98	5.3	3.7	80	1	1	1	17	5747.99
80.1	2	NA	70	66	NA	58	158	158	NA	148	99	15.93	102	3.6	7.5	80	1	1	2	28	7158.72
70.3	1	1	90	86	80	NA	164	156	156	NA	97	7.75	107	4	5.2	80	1	1	2	15	12320.4
79.1	1	1	NA	70	NA	NA	NA	164	NA	NA	48	9.29	107	4.5	5.6	80	1	1	2	17	7938.51
67.7	1	1	62	58	52	NA	114	108	116	NA	106	10.74	101	4.3	6.3	81	2	1	2	15	14299.5
90.2	1	2	64	64	60	NA	166	162	160	NA	75	24.38	107	4	4.7	82	2	1	1	17	5746.22
49.1	2	NA	94	92	84	NA	206	200	196	NA	167	10.41	98	4.4	5.2	83	2	1	2	27	11007.9
67	2	NA	52	58	42	NA	156	152	140	NA	148	13.27	100	4.2	4.6	84	2	1	2	27	14083.9
64	1	2	62	58	60	NA	116	112	110	NA	92	14.6	104	4.1	5.2	85	2	1	2	15	16370.8
68.5	1	1	60	60	62	NA	146	148	148	NA	62	7.86	102	5.3	8.1	85	1	1	1	22	16038.8
56.5	2	NA	66	62	64	NA	150	144	150	NA	160	21.46	103	4.2	5.2	85	1	1	2	17	8054.45
56.2	2	NA	50	50	46	NA	156	152	142	NA	170	8.22	103	4.5	5.9	85	2	1	2	27	14028.3
50.1	1	1	NA	84	78	86	NA	180	160	186	62	9	105	4.1	3.9	85	2	1	2	17	9492.98
76.8	2	NA	56	50	46	NA	190	196	190	NA	134	7.19	105	4.7	6	85	1	1	1	20	18178.3
35.8	NA	NA	NA	60	66	62	NA	92	92	90	63	3.95	99	3.5	4.3	12	1	1	1	39	9286.94
37.5	NA	NA	64	NA	60	68	94	NA	94	90	79	8.45	104	4.5	3.5	12	1	1	1	42	7806.13
36.8	NA	NA	54	48	52	NA	96	94	94	NA	60	9.36	105	4.3	3.3	12	1	1	1	40	14529.7
70.2	NA	NA	56	NA	NA	NA	96	NA	NA	NA	87	20.31	102	4.1	3.9	12	2	1	1	43	14166.7
37.5	NA	NA	62	68	68	NA	98	102	104	NA	94	14.24	104	4	3	12	2	1	2	42	12729.9
38.6	NA	NA	56	58	52	NA	104	100	100	NA	67	8.47	105	4.2	5.5	12	1	1	1	39	9485.91
63.8	NA	NA	60	58	54	NA	104	104	100	NA	93	11.56	107	3.8	4.1	12	2	1	2	30	14932.4
44.7	NA	NA	66	64	NA	NA	106	102	NA	NA	71	7.1	101	3.7	3.7	12	1	1	1	34	8258.81
52.2	NA	NA	NA	NA	58	NA	NA	NA	104	NA	58	10.68	105	3.6	5.2	12	1	1	1	34	0
52.4	NA	NA	60	54	64	NA	106	104	104	NA	90	7.53	103	4.9	5.4	12	1	1	2	43	10407.2
42.8	NA	NA	32	38	NA	26	108	106	NA	106	69	6.15	102	4.2	4.3	12	1	1	2	43	15456.8
53.6	NA	NA	54	60	62	NA	108	106	106	NA	78	21.69	108	4.2	4.2	12	2	1	2	33	16799.6
67.6	NA	NA	34	NA	NA	NA	108	NA	NA	NA	99	21.09	105	4	5.1	12	1	1	2	42	13363.3
77.2	NA	NA	56	60	58	NA	110	106	108	NA	95	37.39	104	3.5	4.3	12	1	1	2	42	10310.9
41.5	NA	NA	62	NA	NA	NA	110	NA	NA	NA	92	5.7	103	3.8	6.3	12	1	1	1	43	10407.2
56.8	NA	NA	60	64	68	NA	116	110	106	NA	68	23.08	105	4	5.2	12	1	1	2	40	12767
58.7	NA	NA	30	40	42	NA	110	114	110	NA	96	10.47	101	4.2	5	12	1	1	1	43	11339.3
43.4	NA	NA	60	66	68	NA	120	108	108	NA	144	16.83	104	3.9	3.1	12	2	1	1	34	9791.02
58.3	NA	NA	32	NA	NA	NA	112	NA	NA	NA	117	15.83	105	4.1	4.4	12	2	1	1	34	12225.4
62.7	NA	NA	54	NA	54	NA	108	NA	116	NA	117	6.33	105	4	6.6	12	2	1	2	39	17228
42.4	NA	NA	50	66	72	NA	110	114	114	NA	74	8.01	106	3.8	5.5	12	2	1	1	31	17882.9
54.1	NA	NA	68	56	50	NA	114	110	114	NA	107	18.53	103	4	5.4	12	1	1	2	42	0
44.7	NA	NA	NA	62	NA	NA	NA	114	NA	NA	64	3.88	101	3.9	3.9	12	1	1	1	43	14871.6
76.2	NA	NA	52	50	68	NA	118	120	108	NA	88	49.3	106	3.9	4.2	12	2	1	1	42	0
90.1	NA	NA	36	36	36	NA	128	112	106	NA	83	21.57	107	4.1	6.3	12	2	1	1	43	11973.2
49.2	NA	NA	40	38	42	NA	118	112	122	NA	36	10.33	106	3.5	3.7	12	2	1	2	40	8792.62
52.1	NA	NA	74	76	76	NA	116	122	114	NA	146	17.88	102	3.7	4.1	12	2	1	2	40	8880.21
47.6	NA	NA	54	NA	40	NA	122	NA	114	NA	73	7.25	103	3.8	4.1	12	1	1	2	38	21293.2
63.4	NA	NA	52	56	56	NA	118	126	124	NA	55	7.27	103	4	5.9	12	1	1	1	43	10395.8
62.2	NA	NA	76	NA	72	76	124	NA	132	130	94	18.91	103	4	4.2	12	2	1	1	38	17230.7
45.5	NA	NA	NA	NA	NA	NA	NA	NA	NA	NA	71	1.82	105	4	6.6	12	1	1	1	33	13666.7
56.9	NA	NA	60	62	NA	58	84	90	NA	86	93	20.43	105	4.3	5.7	13	2	1	1	38	13678.6
65.9	NA	NA	48	44	52	NA	84	94	86	NA	87	10.64	103	4.2	6.7	13	1	1	1	43	10304.5
35.5	NA	NA	56	50	54	NA	92	94	96	NA	62	3.36	105	4.1	3.3	13	1	1	1	34	11896.5
43.4	NA	NA	NA	40	42	40	NA	96	98	88	77	8.75	107	4.2	4.5	13	2	1	1	32	18869
44	NA	NA	NA	68	NA	70	NA	96	NA	92	70	5.31	103	4.1	4.8	13	1	1	1	42	7806.13
50.4	NA	NA	66	60	60	NA	98	94	90	NA	74	17.98	106	4.4	4.1	13	2	1	1	40	10626.7
46.2	NA	NA	56	64	NA	64	94	96	NA	98	67	7.69	105	4.5	4.2	13	2	1	2	38	19323.4
40.1	NA	NA	64	NA	62	NA	96	NA	98	NA	82	3.39	107	4	6	13	1	1	2	38	14195.5
46.1	NA	NA	58	58	62	NA	102	96	96	NA	93	6.43	103	4.2	3.7	13	1	1	2	38	13775.8
47.8	NA	NA	52	54	54	NA	98	100	98	NA	94	9.92	103	3.7	4.5	13	2	1	1	43	10970.6
65.4	NA	NA	28	46	28	NA	104	98	96	NA	67	5.26	105	4.2	5.4	13	1	1	1	34	11896.5
68.8	NA	NA	48	50	50	NA	100	102	98	NA	71	13.74	103	4	5	13	2	1	1	39	12926.8
48.9	NA	NA	62	70	70	NA	98	104	100	NA	91	21.29	105	4	2.8	13	2	1	1	38	17079.5
79.5	NA	NA	66	60	54	NA	100	100	102	NA	104	23.77	104	4.1	4.1	13	2	1	1	43	15792.6
46.9	NA	NA	52	56	42	NA	98	104	102	NA	67	5.74	104	4.1	3.3	13	2	1	1	39	10088
62.7	NA	NA	62	62	60	NA	96	106	102	NA	80	8.24	105	4.2	6.5	13	1	1	1	34	11896.5
49.7	NA	NA	66	70	62	NA	102	104	100	NA	111	11.2	100	3.9	4.5	13	2	1	2	40	8617.65
50.5	NA	NA	44	NA	NA	42	102	NA	NA	102	85	4.17	106	4.3	4.4	13	1	1	1	43	0
51.6	NA	NA	46	52	48	NA	102	106	102	NA	115	5.02	105	4.1	5.5	13	1	1	1	35	13992.1
54.2	NA	NA	62	66	72	NA	102	108	100	NA	56	5.31	105	4.1	3.6	13	2	1	1	43	10982.6
48.4	NA	NA	64	NA	54	62	106	NA	108	104	82	5.27	104	4	3.9	13	2	1	1	42	17275.4
57.1	NA	NA	58	48	44	NA	102	108	110	NA	105	6.71	107	3.6	6.3	13	1	1	2	30	12732.9
50.5	NA	NA	62	62	64	NA	106	108	108	NA	95	8.91	103	4	4	13	1	1	2	38	13775.8
77.5	NA	NA	60	64	58	NA	112	104	106	NA	133	25.31	107	4.4	6.5	13	2	1	1	34	15113.6
43.3	NA	NA	54	54	48	NA	112	110	102	NA	76	10.43	105	4	4.1	13	1	1	1	34	11483.1
58.6	NA	NA	68	64	64	NA	108	110	108	NA	97	27.74	103	3.9	4.2	13	2	1	2	38	19323.4
50.9	NA	NA	NA	NA	NA	50	NA	NA	NA	110	87	5.95	106	3.7	5.2	13	2	1	1	31	21577.1
46.4	NA	NA	88	NA	80	84	114	NA	108	110	83	8.19	104	3.7	3.3	13	2	1	1	39	12912.6
63.8	NA	NA	NA	76	70	66	NA	116	108	108	90	18.04	105	3.9	4.8	13	2	1	2	37	18314.4
103	NA	NA	62	60	62	NA	110	112	112	NA	93	24.92	103	4.2	7	13	1	1	1	41	8781.55
59.8	NA	NA	56	58	54	NA	110	108	122	NA	81	10.71	107	4.3	5.1	13	1	1	1	34	11483.1
69.7	NA	NA	56	NA	82	80	114	NA	114	116	105	3.7	107	4.1	4.8	13	1	1	2	32	11452.3
69.2	NA	NA	56	46	NA	48	116	118	NA	112	103	29.35	104	4.3	5.6	13	1	1	1	43	15593.7
62	NA	NA	56	62	NA	56	118	116	NA	114	96	10.48	103	4	5.8	13	1	1	1	39	13675.1
79.4	NA	NA	NA	NA	NA	66	NA	NA	NA	116	116	54.11	105	4.2	5.3	13	1	1	2	39	15187.4
58.4	NA	NA	68	70	60	NA	110	120	120	NA	61	13.9	106	3.7	3.6	13	2	1	2	40	8792.62
72.4	NA	NA	42	40	44	NA	122	118	110	NA	96	21.74	105	4.4	6.6	13	1	1	1	40	9883.13
78.1	NA	NA	60	60	62	NA	122	114	120	NA	66	15.39	102	4.1	4.7	13	1	1	1	42	12170
56.6	NA	NA	56	54	56	NA	118	120	126	NA	70	10.7	104	3.8	6.8	13	1	1	2	39	15187.4
57.5	NA	NA	68	68	68	NA	90	100	92	NA	63	4.04	102	3.9	6.1	14	1	1	1	40	9883.13
52.3	NA	NA	62	62	58	NA	96	102	88	NA	105	2.52	105	4.1	4.7	14	1	1	1	34	16636
45.2	NA	NA	56	56	58	NA	98	100	98	NA	47	5.64	106	4.1	3.2	14	2	1	2	38	14980.4
61.8	NA	NA	48	48	50	NA	98	102	96	NA	103	3.87	103	4	5.3	14	1	1	1	34	11483.1
52.8	NA	NA	66	74	64	NA	104	100	96	NA	67	7.95	103	4	5.8	14	1	1	2	30	12732.9
49.4	NA	NA	44	42	42	NA	98	102	102	NA	63	7.23	105	4.1	5	14	1	1	1	34	11483.1
45.8	NA	NA	50	54	48	NA	100	102	102	NA	85	2.76	105	3.6	4.6	14	2	1	1	33	15520.1
52.7	NA	NA	70	62	60	NA	104	102	100	NA	76	6.43	105	3.5	5.1	14	2	1	1	42	11056.3
64	NA	NA	64	60	56	NA	104	102	102	NA	140	21.22	109	4	6.2	14	2	1	1	41	9442.28
55.2	NA	NA	52	54	52	NA	100	108	102	NA	70	3.48	104	3.9	4.6	14	2	1	2	40	8880.21
47	NA	NA	60	NA	NA	NA	104	NA	NA	NA	113	5.65	103	3.5	5.6	14	2	1	2	43	12216.3
54.7	NA	NA	56	54	48	NA	106	104	104	NA	111	7.7	104	4	5.3	14	2	1	1	33	15674.7
41.9	NA	NA	68	68	72	NA	112	104	100	NA	58	8.31	105	3.8	3.9	14	2	1	1	34	15113.6
50.8	NA	NA	62	56	58	NA	116	98	104	NA	90	7.44	105	3.8	3.9	14	2	1	1	34	12225.4
59.9	NA	NA	NA	NA	84	80	NA	NA	104	112	101	4.39	104	4.4	5.5	14	1	1	1	31	19684.3
71.9	NA	NA	62	58	48	NA	108	106	110	NA	100	25.04	106	4.3	5	14	1	1	1	34	11896.5
61.2	NA	NA	62	62	60	NA	114	110	102	NA	93	11.85	106	3.8	4.8	14	2	1	1	34	12665.4
49.9	NA	NA	60	68	72	NA	108	112	112	NA	70	11.01	106	3.7	3.7	14	2	1	2	40	10828.4
73.5	NA	NA	42	40	42	NA	114	112	110	NA	107	75.39	106	4.3	5.4	14	2	1	2	43	0
116.6	NA	NA	74	NA	NA	NA	112	NA	NA	NA	85	79.98	104	4.6	5.1	14	2	1	2	42	10977.3
48	NA	NA	52	54	54	NA	118	110	110	NA	103	8.48	105	4	7	14	1	1	2	40	8258.81
41.4	NA	NA	NA	NA	60	66	NA	NA	116	110	94	10.79	106	4.3	5	14	2	1	2	38	15096.4
112.6	NA	NA	66	70	68	NA	114	116	110	NA	135	35.47	105	3.8	4.8	14	2	1	1	34	16829.8
54.1	NA	NA	0	0	NA	34	116	110	NA	116	75	8.64	105	4.1	4.6	14	1	1	2	43	15456.8
74.5	NA	NA	62	62	62	NA	116	116	112	NA	105	35.37	105	4	6.7	14	2	1	2	43	10313
55.6	NA	NA	66	64	72	NA	118	116	112	NA	57	12.77	106	3.7	3.2	14	2	1	1	40	0
72.9	NA	NA	70	70	76	NA	116	116	116	NA	109	22.47	104	4.3	5.4	14	1	1	1	40	9981.58
61	NA	NA	50	50	48	NA	122	114	114	NA	71	4.56	104	3.2	4.2	14	2	1	2	38	12225.4
69.2	NA	NA	82	78	NA	NA	114	120	NA	NA	98	14.38	104	3.7	3.4	14	2	1	2	38	15096.4
68.1	NA	NA	46	48	54	NA	132	120	112	NA	92	12.63	101	3.9	6.6	14	1	1	1	43	10395.8
68.2	NA	NA	44	52	48	NA	118	120	126	NA	93	10.76	109	4.3	5.1	14	1	1	1	34	16636
52.3	NA	NA	NA	46	NA	NA	NA	124	NA	NA	77	25.31	102	4.2	6.2	14	1	1	2	34	17254.6
51.4	NA	NA	68	62	NA	50	138	134	NA	134	70	5.34	101	4.2	6.3	14	1	1	2	35	14067
62	NA	NA	NA	NA	NA	NA	NA	NA	NA	NA	105	13.25	105	4.5	6.7	14	1	1	1	40	9970.62
43.1	NA	NA	68	62	60	NA	90	86	82	NA	73	4.5	105	4.7	5.6	15	1	1	1	40	14972.4
47.2	NA	NA	46	40	44	NA	90	92	86	NA	87	1.42	104	3.8	3.4	15	2	1	1	31	17261.7
52.8	NA	NA	58	64	62	NA	90	94	92	NA	111	3.83	106	4.1	4.6	15	2	1	2	38	19174.9
49.9	NA	NA	52	50	46	NA	90	96	92	NA	50	4.66	102	4.2	4.4	15	1	1	1	43	15610.8
75.7	NA	NA	NA	NA	70	72	NA	NA	98	90	72	11.88	104	4.3	5.1	15	1	1	1	42	12170
58.1	NA	NA	NA	60	NA	NA	NA	96	NA	NA	102	37.3	109	3.9	3.7	15	2	1	1	34	12225.4
59.6	NA	NA	64	66	64	NA	100	94	96	NA	58	3.54	103	4.1	5.4	15	1	1	1	39	9286.94
63.7	NA	NA	70	74	NA	NA	94	100	NA	NA	90	17.99	105	4	6.5	15	1	1	1	41	12673.6
73.1	NA	NA	60	NA	56	52	98	NA	98	98	99	14.2	106	4.3	7	15	1	1	1	31	19684.3
54.6	NA	NA	50	52	46	NA	106	98	98	NA	79	6.17	107	4.1	3.3	15	2	1	1	42	11056.3
70	NA	NA	56	56	56	NA	106	102	96	NA	88	11.88	105	3.9	5.1	15	1	1	1	34	11483.1
44.4	NA	NA	54	66	62	NA	104	102	102	NA	67	6.31	106	3.5	7	15	2	1	1	34	15113.6
90.6	NA	NA	66	58	58	NA	104	100	106	NA	91	24.76	105	4.1	4.5	15	2	1	2	40	9888.56
49.5	NA	NA	54	NA	46	NA	104	NA	104	NA	61	7.94	103	4.3	5.5	15	1	1	1	31	19000.4
66.5	NA	NA	76	NA	80	74	108	NA	110	102	93	3.96	109	4.6	4.3	15	2	1	2	32	13005.4
63.3	NA	NA	40	46	40	NA	104	108	110	NA	69	7.55	105	4.3	6.3	15	1	1	1	40	14972.4
53.5	NA	NA	58	64	NA	50	106	112	NA	106	71	8.66	103	4.6	4.5	15	1	1	1	43	15593.7
63.2	NA	NA	60	NA	70	62	108	NA	110	106	99	9.72	102	4.5	6.4	15	1	1	2	35	14750
65.1	NA	NA	40	46	36	NA	106	112	106	NA	57	28.69	105	4.3	6.6	15	1	1	1	31	19684.3
68.9	NA	NA	NA	72	NA	70	NA	110	NA	106	93	9.74	102	3.9	7.2	15	1	1	2	37	16127.3
43.9	NA	NA	NA	76	84	70	NA	110	108	108	77	4.86	104	4	2.6	15	2	1	1	38	17230.7
43.8	NA	NA	NA	56	NA	NA	NA	110	NA	NA	58	2.96	105	4.2	5.2	15	1	1	1	43	15456.8
50.6	NA	NA	68	68	68	NA	112	108	110	NA	134	3.04	105	3.4	5.3	15	2	1	2	38	14666.1
78.9	NA	NA	62	62	NA	56	112	108	NA	110	105	5.07	103	3.9	5.2	15	1	1	2	38	13523.3
66.5	NA	NA	60	NA	52	56	112	NA	104	116	99	12.8	106	3.9	5.7	15	2	1	1	42	8637.72
95	NA	NA	66	74	74	NA	112	120	106	NA	114	29.1	103	3.9	6.3	15	1	1	1	34	17234.8
65.3	NA	NA	56	62	60	NA	114	112	118	NA	100	13.68	103	4.1	6.2	15	2	1	1	34	12665.4
59.1	NA	NA	58	56	58	NA	118	116	112	NA	74	8.8	104	3.9	3.9	15	2	1	1	34	15113.6
62.5	NA	NA	NA	76	72	78	NA	116	114	120	58	20	102	3.9	4	15	2	1	1	38	17230.7
63.7	NA	NA	48	54	56	NA	120	114	116	NA	118	6.94	106	3.9	6.6	15	1	1	1	34	11483.1
55.5	NA	NA	66	NA	70	70	120	NA	118	118	75	12.29	103	4.2	3.8	15	2	1	1	37	17787.5
66	NA	NA	60	58	54	NA	124	114	118	NA	62	12.03	106	4.7	5.4	15	1	1	1	34	17234.8
71.7	NA	NA	40	36	44	NA	120	114	124	NA	81	24.96	105	3.8	6.5	15	1	1	1	34	17234.8
55.9	NA	NA	50	62	NA	38	120	124	NA	118	74	7.3	100	4.1	5.2	15	1	1	2	35	14067
79.3	NA	NA	68	68	60	NA	124	122	118	NA	96	19.06	102	4.1	6	15	1	1	1	42	11927.8
82.5	NA	NA	46	42	54	NA	124	122	120	NA	116	14.9	104	3.9	7.1	15	1	1	1	40	14972.4
107.3	NA	NA	56	NA	NA	NA	128	NA	NA	NA	124	27.27	100	3.9	8.8	15	1	1	1	31	19000.4
74.1	NA	NA	84	80	NA	NA	138	132	NA	NA	123	15.03	101	4.5	6.7	15	1	1	1	43	10395.8
52.3	2	NA	58	62	68	NA	94	90	90	NA	81	14.95	108	4.1	3.6	16	2	1	1	34	13994.1
52.3	2	NA	46	44	46	NA	96	92	94	NA	72	7.13	103	3.5	5	16	2	1	2	40	8880.21
67.1	2	NA	54	62	58	NA	96	96	96	NA	105	10.76	103	4.1	4.7	16	2	1	2	42	9868.77
58.5	2	NA	54	50	46	NA	96	104	90	NA	87	6.3	101	4	5.2	16	2	1	2	43	10752.3
53.8	2	NA	54	58	56	NA	96	98	98	NA	83	6.36	104	3.7	3.6	16	2	1	1	34	8792.62
58.3	NA	NA	66	68	58	NA	88	104	102	NA	89	5.4	100	4.3	7.7	16	1	1	1	40	9970.62
56.1	2	NA	56	52	52	NA	100	98	98	NA	73	5.02	108	4.1	5.4	16	2	1	1	34	13994.1
46.9	2	NA	60	NA	62	NA	102	NA	100	NA	54	10.22	99	4.7	4.1	16	2	1	1	43	8119.42
61.8	2	NA	68	54	62	NA	102	104	100	NA	43	7.05	105	4	4.2	16	2	1	1	36	17208
44.2	2	NA	58	60	60	NA	106	102	102	NA	76	11.73	107	4	3.6	16	2	1	1	31	21577.1
80	2	NA	38	46	38	NA	104	102	104	NA	90	7.72	103	4.3	5.7	16	1	1	2	40	9713.35
53.5	2	NA	60	62	62	NA	104	104	108	NA	66	8.81	106	4.2	4.3	16	2	1	2	38	15113
47.6	2	NA	42	NA	NA	NA	106	NA	NA	NA	140	5.76	104	4.1	7.1	16	1	1	1	34	11896.5
58.7	2	NA	NA	NA	NA	54	NA	NA	NA	106	59	7.25	103	3.9	3.5	16	2	1	2	36	21601
65.2	2	NA	48	44	NA	NA	104	108	NA	NA	106	10.8	106	4	7.5	16	1	1	1	33	13666.7
69.5	2	NA	52	52	50	NA	112	104	102	NA	81	9.85	106	3.9	5.9	16	1	1	2	33	14793.4
85.5	2	NA	50	58	44	NA	106	106	106	NA	172	8.62	101	3.9	6.8	16	1	1	1	39	11471.3
74.5	2	NA	48	62	60	NA	104	112	104	NA	88	7.49	105	4.3	5.7	16	1	1	1	34	11483.1
57.7	2	NA	54	50	42	NA	106	114	104	NA	57	6.77	108	3.8	5.3	16	1	1	1	34	11483.1
47.7	2	NA	54	54	56	NA	106	110	110	NA	78	22.88	105	3.4	3.2	16	2	1	2	40	0
79.9	2	NA	68	66	66	NA	108	110	108	NA	78	13.78	107	4.1	4.5	16	2	1	2	43	10752.3
84.1	2	NA	58	50	54	NA	106	108	114	NA	86	10.91	103	3.8	5.9	16	1	1	2	42	9351.69
102.7	2	NA	64	70	72	NA	108	110	110	NA	86	8.05	105	4.3	6.1	16	1	1	1	34	13308.8
47.8	2	NA	72	72	NA	78	112	112	NA	106	103	14.22	105	3.8	5.5	16	2	1	2	38	15113
62	2	NA	52	56	58	NA	114	106	112	NA	72	8.2	108	3.9	2.6	16	2	1	1	34	13994.1
122.2	2	NA	68	70	76	NA	110	116	108	NA	79	7.74	103	4.2	6.5	16	1	1	1	40	11964.8
63.8	2	NA	38	NA	34	NA	112	NA	112	NA	75	9.84	106	4.4	5.2	16	1	1	2	40	8258.81
53.4	2	NA	50	52	44	NA	116	114	108	NA	73	18.1	102	3.7	6.1	16	1	1	2	42	11111.3
62.2	2	NA	NA	48	58	NA	NA	116	112	NA	94	6.44	100	4.1	5.5	16	1	1	2	32	12379
65	2	NA	84	78	76	NA	112	112	120	NA	97	4.1	99	3.9	5.4	16	1	1	2	38	14070.9
59.2	2	NA	54	40	42	NA	118	110	118	NA	95	17.63	105	3.8	6.1	16	1	1	2	40	8258.81
83.6	2	NA	36	36	30	NA	116	118	112	NA	95	8.28	102	3.8	5.6	16	1	1	1	40	11977.9
70.5	2	NA	54	48	48	NA	118	116	120	NA	123	18.72	106	4.1	5	16	2	1	2	40	8802.28
64.5	2	NA	56	70	76	NA	114	128	116	NA	62	12.13	102	4.2	6.4	16	1	1	1	43	10304.5
62.8	2	NA	66	66	64	NA	118	118	124	NA	144	9.69	104	3.7	3.7	16	2	1	2	40	8880.21
60.5	2	NA	66	68	60	NA	126	138	138	NA	153	10.47	104	3.6	6.6	16	1	1	1	40	9883.13
137.7	2	NA	84	80	NA	80	142	140	NA	136	107	54.03	105	4	6.8	16	1	1	2	43	11588.9
67.6	2	NA	NA	NA	NA	NA	NA	NA	NA	NA	72	31.37	102	4.6	4.7	16	2	1	1	42	10237.3
70.3	2	NA	NA	NA	NA	NA	NA	NA	NA	NA	85	10.53	105	4.2	7	16	1	1	1	41	9789.44
96.5	1	2	48	NA	NA	NA	128	NA	NA	NA	86	28.03	103	4	5.2	16	1	1	1	40	9508.93
51.9	2	NA	40	40	42	NA	96	96	94	NA	115	8.14	105	3.8	4.1	17	2	1	2	42	15175.5
59.2	2	NA	56	60	62	NA	94	94	98	NA	84	6.37	108	3.5	3.1	17	2	1	2	38	15096.4
64.4	2	NA	58	56	56	NA	94	100	94	NA	80	8.53	103	4.3	6.1	17	1	1	2	38	14195.5
61.8	NA	NA	60	68	68	NA	98	106	96	NA	85	7.66	104	4	6.2	17	1	1	1	31	19000.4
72.3	2	NA	46	48	58	NA	100	104	98	NA	113	9.25	101	4.1	5.8	17	1	1	1	39	10341.5
53	2	NA	NA	68	68	NA	NA	100	102	NA	76	2.42	104	4.1	3.5	17	2	1	1	43	10970.6
99.8	2	NA	76	80	70	NA	106	100	98	NA	104	12.25	99	4	6.7	17	1	1	1	40	9893.99
53.8	2	NA	70	66	60	NA	102	102	102	NA	64	6.19	103	3.8	4.2	17	2	1	1	34	0
79.7	2	NA	56	58	56	NA	104	106	104	NA	92	11.2	106	3.9	4.8	17	2	1	2	40	12232.5
76.7	2	NA	NA	NA	NA	78	NA	NA	NA	106	88	7.45	101	4.1	4.2	17	2	1	2	43	10410.3
78.9	2	NA	58	50	52	NA	108	110	102	NA	85	20.11	107	3.6	3.8	17	2	1	1	33	17435.4
58.2	2	NA	68	72	74	NA	108	110	110	NA	98	7.31	105	4.3	3.6	17	2	1	1	31	21577.1
62.5	2	NA	70	70	NA	NA	118	104	NA	NA	85	9.43	101	4	4.5	17	1	1	2	35	14766.2
62.6	2	NA	62	66	NA	64	112	114	NA	108	116	2.79	102	3.5	3.4	17	2	1	2	38	14666.1
84.3	2	NA	66	66	64	NA	112	112	110	NA	106	17.54	103	3.8	6.8	17	2	1	2	38	16810.6
46.4	2	NA	64	54	52	NA	114	112	110	NA	83	21.99	108	3.8	3.8	17	2	1	1	34	12665.4
85.3	2	NA	68	72	74	NA	110	112	114	NA	86	8.98	105	4	5.1	17	1	1	1	38	15056.4
91.9	2	NA	70	72	76	NA	110	114	118	NA	98	24.32	105	3.9	4.8	17	2	1	1	40	10615.1
81.4	2	NA	NA	NA	42	NA	NA	NA	116	NA	71	7.51	103	4.2	5.9	17	1	1	1	38	12031.9
138.8	2	NA	58	58	NA	NA	120	114	NA	NA	104	7.35	103	4.3	5.6	17	1	1	2	38	15058.9
88.6	NA	NA	68	62	66	NA	118	116	118	NA	111	3.79	103	3.9	6.9	17	1	1	1	34	11483.1
73.4	2	NA	70	NA	78	NA	122	NA	116	NA	111	19.71	105	3.9	4.9	17	2	1	1	42	16931.7
80.5	2	NA	NA	64	70	NA	NA	122	116	NA	86	6.48	106	4	4.4	17	2	1	2	32	13005.4
82.4	2	NA	62	62	66	NA	122	116	120	NA	157	12.77	105	3.8	4.8	17	1	1	1	34	11489.8
59.4	NA	NA	62	NA	62	62	124	NA	120	118	63	4.45	103	3.9	4.4	17	1	1	1	34	0
63.2	2	NA	62	70	70	NA	124	122	120	NA	90	2	103	3.8	5.3	17	1	1	1	40	9981.58
101.8	2	NA	52	52	54	NA	128	128	130	NA	96	22.43	103	4.4	7.2	17	1	1	1	34	11489.8
79.4	2	NA	70	70	56	NA	134	134	124	NA	86	2.21	105	3.9	5.5	17	1	1	1	34	11090.7
55.3	NA	NA	NA	NA	NA	NA	NA	NA	NA	NA	105	7.96	107	4.5	3.3	17	2	1	1	34	12225.4
71.4	1	2	52	50	56	NA	122	124	118	NA	53	10.74	103	4.4	5.6	17	1	1	1	40	9508.93
148.6	1	1	80	76	80	NA	136	134	134	NA	121	29.94	100	3.9	7	17	2	1	1	34	13798.6
106.2	2	NA	50	54	50	NA	100	96	94	NA	113	5.62	105	4	4	18	2	1	2	40	4634.45
46.3	2	NA	64	62	58	NA	96	100	98	NA	130	13.47	105	3.8	3	18	2	1	2	40	10739.5
54.3	2	NA	56	62	68	NA	98	98	100	NA	106	5.18	101	4	5	18	2	1	2	40	8459.72
57.4	2	NA	52	48	50	NA	100	100	96	NA	106	8.09	103	4	3.6	18	2	1	1	43	11067.7
68.5	2	NA	60	56	56	NA	100	100	96	NA	74	10.71	104	4.2	5.7	18	1	1	2	43	11452.3
61.3	2	NA	62	70	56	NA	106	98	94	NA	86	5.04	103	4.4	5	18	1	1	1	31	19000.4
54.6	2	NA	64	62	60	NA	104	102	98	NA	133	6.6	106	3.8	5.1	18	2	1	1	32	18869
84.3	2	NA	64	66	62	NA	102	102	100	NA	72	21.21	107	4	5	18	2	1	1	34	11807.5
56.9	NA	NA	52	56	60	NA	102	104	102	NA	102	24.07	104	4.6	4	18	2	1	2	42	15175.5
75.1	2	NA	64	62	66	NA	92	114	106	NA	116	20.86	103	4	6.1	18	1	1	2	40	8258.81
52.9	2	NA	70	70	68	NA	112	100	104	NA	94	4.71	102	4.3	4.6	18	2	1	2	42	11786.9
52.1	2	NA	62	NA	NA	52	106	NA	NA	106	86	11.73	102	3.7	4.4	18	2	1	2	43	10752.3
58.5	2	NA	NA	60	NA	60	NA	108	NA	104	64	14.08	105	4	5.8	18	1	1	2	43	0
61.3	2	NA	58	56	56	NA	106	110	102	NA	50	7.78	107	3.8	2.8	18	2	1	2	38	12665.4
60.8	2	NA	56	58	56	NA	108	106	108	NA	118	3.59	105	4.2	4.8	18	1	1	1	43	10395.8
81.6	2	NA	NA	46	46	40	NA	108	106	108	82	5.68	105	3.8	3.4	18	2	1	1	42	8465.82
64	2	NA	62	62	64	NA	112	106	108	NA	117	6.07	103	3.5	5.7	18	1	1	1	40	9981.58
90.7	2	NA	54	58	NA	56	110	108	NA	108	87	39.4	104	3.8	5.1	18	2	1	2	38	16681.4
65.4	2	NA	64	NA	68	76	110	NA	106	112	145	5.84	103	3.7	5.9	18	1	1	2	39	12030.1
81.8	2	NA	56	60	72	NA	112	116	110	NA	79	5.77	108	4	5.6	18	1	1	1	34	11090.7
55.1	2	NA	72	74	68	NA	108	112	120	NA	53	2.46	98	4.3	5.6	18	1	1	1	31	15200.3
68.5	2	NA	52	48	54	NA	114	114	118	NA	161	2.57	106	4	6.4	18	2	1	2	38	15096.4
83	2	NA	78	72	78	NA	116	114	116	NA	121	17.81	101	3.9	6.6	18	1	1	1	31	19000.4
55.9	2	NA	NA	82	84	70	NA	122	116	110	71	4.19	100	4.3	7.4	18	1	1	2	38	14179.9
60.1	2	NA	NA	46	46	NA	NA	116	116	NA	81	5.11	105	4.5	4.4	18	1	1	1	43	10304.5
60.1	2	NA	80	76	72	NA	116	118	120	NA	79	4.29	105	3.9	4.4	18	2	1	2	40	14208.3
83.7	2	NA	66	70	70	NA	116	120	118	NA	90	14.39	105	4.6	5.8	18	1	1	2	43	9161.83
57.6	2	NA	54	58	54	NA	124	116	116	NA	113	11.25	100	3.9	6.4	18	1	1	1	43	10315.9
123.6	2	NA	NA	NA	74	NA	NA	NA	120	NA	87	26.42	104	4.2	6.5	18	2	1	1	42	19258.2
66.8	2	NA	54	NA	48	46	122	NA	122	118	52	9.91	102	4.1	5.3	18	1	1	1	38	0
60.1	NA	NA	62	NA	62	NA	126	NA	118	NA	113	5.33	102	4.3	6.2	18	1	1	2	35	11800
60.4	2	NA	70	64	72	NA	122	122	122	NA	89	4.99	104	4.3	4.3	18	1	1	1	34	13787.8
102.3	2	NA	46	48	46	NA	124	122	122	NA	79	39.9	99	3.9	6.3	18	1	1	1	43	7626.48
64.4	2	NA	60	68	62	NA	130	132	124	NA	213	13.61	104	4.3	8.7	18	1	1	2	40	8267.89
83.8	2	NA	60	54	NA	62	126	140	NA	130	88	13	100	3.6	5.9	18	1	1	2	35	14766.2
72.5	1	2	60	NA	62	60	108	NA	102	108	114	6.4	106	4	5.4	18	1	1	2	43	7559.56
55.1	2	NA	NA	20	28	26	NA	90	100	102	174	5.24	104	4.6	4.4	19	2	1	2	43	23750.5
80.7	9	NA	NA	70	68	66	NA	98	94	100	45	35.42	102	3.8	4	19	2	1	1	43	11067.7
44.4	2	NA	62	60	62	NA	100	100	100	NA	90	5.18	100	4	4.2	19	2	1	2	36	21601
60.3	2	NA	62	64	60	NA	102	106	94	NA	101	1.12	102	4	4.9	19	1	1	1	31	0
42.5	2	NA	72	78	72	NA	108	100	96	NA	83	4.94	105	3.7	3.8	19	2	1	1	39	10088
49.7	2	NA	44	50	48	NA	100	102	102	NA	118	20.49	103	4.2	3.8	19	2	1	2	42	16898.7
65.5	2	NA	64	66	70	NA	98	104	102	NA	120	14.64	106	3.4	3.3	19	2	1	1	34	12665.4
65.7	NA	NA	64	64	NA	58	102	94	NA	110	96	36.36	104	3.8	4.6	19	2	1	1	34	14980.4
62.8	2	NA	60	54	58	NA	104	100	108	NA	164	6.42	104	3.9	3.5	19	2	1	2	38	14666.1
78.2	2	NA	54	50	NA	48	106	102	NA	104	67	26.14	103	4.6	4.3	19	2	1	1	31	16558.3
63.5	2	NA	56	56	56	NA	106	102	106	NA	119	9.15	108	3.8	4.6	19	2	1	2	40	8459.72
55.7	2	NA	54	NA	NA	NA	106	NA	NA	NA	84	4.15	101	4.2	6.1	19	1	1	2	43	10304.5
63.8	2	NA	60	58	56	NA	106	108	104	NA	90	3.7	104	3.6	5	19	2	1	1	40	10626.7
52.8	2	NA	60	62	62	NA	110	106	106	NA	73	10.26	108	4	3.6	19	2	1	1	40	10521.9
76.7	2	NA	50	56	44	NA	102	114	108	NA	87	4.4	103	3.9	5.3	19	1	1	2	35	14067
62.8	NA	NA	52	44	46	NA	110	108	108	NA	146	11.7	99	4	7.5	19	1	1	1	31	15200.3
68.1	2	NA	58	58	74	NA	106	108	112	NA	108	12.07	107	4.3	4.9	19	2	1	2	42	9956.13
68.2	2	NA	60	58	NA	68	112	106	NA	110	84	13.22	103	3.7	3	19	2	1	2	38	15113
74.3	2	NA	NA	58	54	58	NA	110	114	104	92	10.55	103	4	6.1	19	1	1	1	39	11471.3
126.6	2	NA	82	74	80	NA	110	110	110	NA	115	23	104	4	7.1	19	2	1	2	42	10977.3
115.8	2	NA	NA	NA	68	66	NA	NA	112	112	80	33.39	103	3.9	6.1	19	1	1	2	40	12511.6
88.1	2	NA	56	62	80	NA	112	116	110	NA	36	5.48	102	4	5.8	19	1	1	2	40	10202.4
61.7	2	NA	62	78	76	NA	114	116	110	NA	78	6.12	103	4.1	6	19	1	1	1	34	11896.5
49	2	NA	60	NA	58	62	120	NA	108	114	68	9.22	100	3.7	2.9	19	2	1	2	38	14963.9
87.7	2	NA	52	56	50	NA	114	114	116	NA	113	18.25	101	4	6.6	19	1	1	1	40	9981.58
74.5	NA	NA	NA	34	36	32	NA	118	110	118	108	8.75	101	4.1	5.7	19	1	1	2	43	7409.12
90.5	2	NA	72	66	66	NA	122	112	112	NA	121	17.49	102	3.7	6.8	19	1	1	1	40	11977.9
79	2	NA	0	0	0	NA	112	118	118	NA	71	7.78	106	3.5	4.5	19	2	1	2	40	8617.65
95.5	2	NA	70	70	NA	NA	112	120	NA	NA	52	7.14	103	4.1	6.2	19	1	1	2	40	10202.4
57.9	2	NA	NA	46	50	NA	NA	122	118	NA	105	13.95	107	4	6.2	19	1	1	2	39	0
90.9	2	NA	66	60	56	NA	130	122	124	NA	97	16.62	108	4.3	6.3	19	1	1	2	38	11896.5
77.6	2	NA	56	58	NA	NA	128	124	NA	NA	96	13.82	101	3.9	4.7	19	1	1	2	38	15807.4
99	2	NA	48	68	58	NA	132	128	128	NA	104	12.39	100	4.4	5.8	19	1	1	2	38	15807.4
98.9	2	NA	84	76	76	NA	132	132	134	NA	92	9.77	109	4.4	7	19	1	1	1	39	11090.7
52.6	2	NA	NA	NA	NA	NA	NA	NA	NA	NA	60	6.34	105	3.9	4.9	19	2	1	1	42	17294.4
59.4	2	NA	NA	NA	NA	NA	NA	NA	NA	NA	114	16.21	108	3.8	4	19	2	1	2	40	11719.8
66.4	1	2	NA	NA	78	60	NA	NA	118	118	77	4.58	101	3.8	4.7	19	2	1	2	30	17727.8
103.6	1	2	78	80	78	NA	136	126	130	NA	73	13.39	101	4	4.6	19	1	1	1	42	0
51.5	2	NA	68	74	72	NA	100	104	106	NA	74	7.31	102	3.8	4.7	20	2	1	1	31	112585
65.4	2	NA	NA	68	64	62	NA	106	102	102	96	13.48	106	4	2.7	20	2	1	2	37	95030.2
56.8	2	NA	40	NA	46	48	112	NA	104	104	69	2.25	107	4.5	4.9	20	1	1	2	39	0
116.3	2	NA	54	54	62	NA	104	114	106	NA	108	42.03	106	3.6	5.1	20	2	1	2	40	0
74.9	2	NA	64	72	NA	68	114	112	NA	106	47	14.08	101	3.7	5	20	2	1	1	43	0
84.8	2	NA	58	NA	NA	54	110	NA	NA	112	140	11.18	105	4.2	5.4	20	2	1	2	39	96778.9
57.3	NA	NA	62	NA	56	NA	114	NA	112	NA	113	5.17	104	4.2	5.5	20	1	1	2	39	76632
66.6	NA	NA	NA	50	54	NA	NA	114	114	NA	55	2.75	104	4.4	7.9	20	1	1	1	42	13939.3
67.9	2	NA	66	64	NA	60	114	116	NA	116	78	3.82	104	4.1	3.5	20	1	1	2	43	58010.3
118.4	2	NA	68	78	72	NA	122	128	122	NA	94	20.66	105	3.9	6.9	20	1	1	1	40	74957.7
49.8	2	NA	42	NA	34	36	92	NA	90	90	131	2.54	107	3.7	3.3	21	2	1	2	43	11070.7
60.3	2	NA	66	60	62	NA	94	98	96	NA	79	2.23	104	3.6	4.7	21	2	1	2	40	76241.9
59.8	2	NA	NA	NA	66	70	NA	NA	110	104	73	15.78	105	3.9	4	21	2	1	2	43	69786.7
45.8	2	NA	64	NA	NA	NA	108	NA	NA	NA	98	3.75	103	3.7	3.6	21	2	1	2	43	9304.18
67.4	2	NA	52	50	56	NA	114	106	106	NA	96	4.45	106	4.1	5.7	21	1	1	2	40	63376.2
97.8	2	NA	50	50	48	NA	108	110	110	NA	86	12.14	101	3.9	5.8	21	1	1	2	42	70500.4
68.2	2	NA	70	NA	54	72	116	NA	116	124	98	3.96	104	4.1	6.2	21	1	1	1	31	100554
75.5	2	NA	52	42	38	NA	122	122	120	NA	107	15.41	109	3.7	3.1	21	2	1	2	40	8927.14
85.2	2	NA	NA	NA	68	68	NA	NA	124	128	123	18.85	104	4.6	6.6	21	1	1	2	43	74850.5
73.6	2	NA	58	58	58	NA	128	124	130	NA	115	15.7	108	3.9	4.4	21	2	1	2	40	6878.8
69.2	2	NA	60	NA	52	NA	130	NA	126	NA	78	15.53	99	3.8	4	21	1	1	1	31	0
64.4	2	NA	26	NA	NA	NA	78	NA	NA	NA	151	18.61	101	4.3	3.7	22	2	1	1	42	17914.1
56.3	2	NA	NA	62	58	NA	NA	94	96	NA	73	6.51	105	4.1	3.8	22	2	1	2	43	67744.9
72.8	2	NA	NA	62	NA	52	NA	108	NA	110	132	11.28	104	4	4.1	22	2	1	1	39	82681.5
82	2	NA	52	54	54	NA	108	112	110	NA	73	9.65	104	3.9	6.5	22	1	1	2	40	0
94.8	2	NA	86	82	80	NA	108	120	104	NA	113	19.09	102	3.8	6.3	22	1	1	2	40	61270.9
68.7	2	NA	86	NA	NA	82	114	NA	NA	110	142	11.8	104	3.8	5.3	22	1	1	2	38	104275
104.1	2	NA	58	56	NA	72	116	120	NA	114	101	12.68	104	3.7	6.4	22	1	1	2	38	99421.9
65.6	2	NA	84	NA	80	80	112	NA	112	108	166	6.6	108	3.6	5.7	23	2	1	2	41	20776.1
77.2	2	NA	80	76	84	NA	114	110	112	NA	97	15.67	105	3.9	4.3	23	1	1	1	38	74097.8
77.4	2	NA	84	68	70	NA	118	126	128	NA	123	40.42	102	3.9	5.6	23	1	1	1	39	70025.2
68.6	2	NA	NA	NA	NA	NA	NA	NA	NA	NA	110	14.45	104	4	5.1	23	2	1	1	38	92561.4
72.6	2	NA	NA	NA	NA	NA	NA	NA	NA	NA	94	6.98	105	3.9	5.1	23	1	1	1	43	55866.1
88	1	2	60	60	64	NA	116	110	114	NA	143	9.99	102	4.1	6.5	23	1	1	2	40	63764.1
101.5	1	1	82	84	86	NA	114	116	112	NA	141	10.62	106	4.2	7.1	23	1	1	1	40	73037.6
96.3	2	NA	60	60	60	NA	106	102	102	NA	165	9.83	106	3.8	3.6	24	2	1	1	34	9377.93
44.6	2	NA	68	70	76	NA	104	106	106	NA	102	2.17	105	3.8	3.7	24	2	1	2	40	76241.9
59.6	2	NA	42	46	46	NA	104	106	108	NA	90	3.95	103	3.6	3.3	24	2	1	1	40	9020.23
89	2	NA	54	58	58	NA	108	110	106	NA	85	9.91	105	4	6.1	24	1	1	2	36	95229.1
70.3	2	NA	60	56	58	NA	112	112	108	NA	111	8.91	106	3.8	3.6	24	2	1	2	40	74218.3
72.5	2	NA	74	68	64	NA	112	110	112	NA	72	7.32	106	4.2	3.7	24	2	1	1	38	83630.9
64.1	2	NA	NA	84	NA	NA	NA	128	NA	NA	131	7.04	101	3.7	6.4	24	1	1	2	40	61270.9
70.4	1	2	54	50	50	NA	94	96	92	NA	70	10.62	108	3.9	3.7	24	2	1	1	31	104103
80.9	1	2	52	44	42	NA	142	146	144	NA	50	10.11	104	4	6.3	24	1	1	2	40	0
62.2	2	NA	58	54	50	NA	108	100	102	NA	86	12.59	109	3	3.8	25	2	1	1	34	13182.6
80.7	2	NA	70	62	60	NA	104	104	104	NA	78	12.97	106	3.9	4.4	25	2	1	1	33	81898.3
61	2	NA	46	NA	NA	NA	106	NA	NA	NA	124	8.08	101	4.2	5.6	25	1	1	2	37	81374.9
92.4	2	NA	56	62	62	NA	110	110	110	NA	72	12.97	107	4.1	4.7	25	2	1	1	31	106839
100.5	2	NA	66	68	70	NA	112	110	110	NA	105	35.58	108	4	6	25	2	1	2	38	100113
61	2	NA	NA	NA	NA	NA	NA	NA	NA	NA	95	3.53	105	4.1	4.2	25	2	1	1	38	89853.2
79.4	2	NA	58	56	60	NA	104	106	104	NA	50	7.25	103	3.8	5.4	26	1	1	2	42	68694.5
71.3	2	NA	78	66	62	NA	108	110	108	NA	123	4.73	107	4	5	26	2	1	1	34	98506.4
89.3	2	NA	78	74	70	NA	122	116	118	NA	122	6.94	105	3.8	6.3	26	1	1	2	38	91093.3
82.9	2	NA	68	64	60	NA	128	126	126	NA	97	5.92	102	3.9	6.6	26	1	1	2	38	91093.3
101	2	NA	82	74	74	NA	136	132	130	NA	121	10.92	103	3.8	7.5	26	1	1	1	34	90065.6
56.8	2	NA	NA	NA	NA	NA	NA	NA	NA	NA	102	7.88	102	3.9	2.5	26	2	1	1	31	21611.3
112.8	2	NA	92	90	94	NA	132	130	128	NA	71	29.22	107	4.4	3.9	26	1	1	1	38	96600.9
64.5	2	NA	70	76	80	NA	102	100	102	NA	149	5.94	104	3.6	4.6	27	2	1	2	38	97548.5
112.9	2	NA	68	66	68	NA	118	118	118	NA	108	28.5	104	4.4	8.3	27	1	1	2	42	70484
74.2	2	NA	70	72	76	NA	120	124	124	NA	162	4.29	106	3.8	6.1	27	2	1	1	34	12608.2
65.4	NA	NA	58	60	58	NA	102	96	94	NA	145	3.67	102	4.4	5.9	28	1	1	2	42	70779.7
76.1	2	NA	NA	NA	56	NA	NA	NA	104	NA	105	9.3	105	4	5.2	28	2	1	1	43	13138.1
74	2	NA	56	62	58	NA	102	108	104	NA	133	6.93	106	3.9	4.2	28	2	1	2	38	11661.5
67.2	2	NA	NA	50	50	58	NA	106	106	104	55	19.56	106	4	5	28	1	1	2	37	0
126.7	2	NA	74	68	66	NA	110	106	106	NA	118	28.77	107	4	6.7	28	2	1	2	40	76169.4
85.8	2	NA	NA	74	80	84	NA	108	110	108	75	16.79	106	5	6.5	28	1	1	1	31	100554
84.9	2	NA	74	74	72	NA	114	112	116	NA	112	8.19	103	3.9	6.5	28	1	1	1	40	74133.5
74.7	2	NA	70	64	72	NA	114	112	118	NA	175	11.98	105	3.7	5.4	28	1	1	1	34	91093.3
96.8	2	NA	68	82	68	NA	120	120	112	NA	102	11.18	105	3.7	6.6	28	1	1	1	34	90065.6
72.7	2	NA	70	56	60	NA	118	116	120	NA	111	5.22	102	3.7	4.6	28	1	1	2	42	70779.7
84	2	NA	68	68	68	NA	120	118	118	NA	113	9.18	109	4.1	7.4	28	2	1	1	34	96448
93.4	2	NA	76	88	NA	NA	122	116	NA	NA	162	8.79	103	4.1	6.7	28	1	1	1	38	74385.9
53.3	2	NA	NA	NA	74	84	NA	NA	120	120	93	5.91	103	3.5	5.1	28	2	1	2	35	90602.2
86.8	2	NA	66	76	74	NA	124	122	116	NA	130	10.34	103	3.5	5.8	28	1	1	2	42	66998.6
81.6	2	NA	NA	NA	NA	NA	NA	NA	NA	NA	136	9.38	104	4	6.1	28	1	1	2	35	72829.7
57.5	2	NA	54	54	52	NA	92	92	90	NA	117	0.71	103	3.9	3.4	29	2	1	2	40	0
59.6	2	NA	50	56	52	NA	92	94	94	NA	96	8.01	106	4	4.3	29	2	1	1	43	6405.86
75.8	2	NA	54	44	48	NA	104	102	106	NA	113	14.11	107	3.5	3.8	29	2	1	2	42	82012.1
[truncated: 21,630 more rows]
